# Supplementary material for: Genome-Wide Association Studies Detect Multiple QTLs for Productivity in Mesoamerican Diversity Panel of Common Bean Under Drought Stress
Source: Front Plant Sci. 2020 Nov 12;11:574674. doi: 10.3389/fpls.2020.574674 (PMC7738703; doi:10.3389/fpls.2020.574674)
Supplement: Supplementary file 3 [file Table_1.xlsx]

## Sheet: ST1
Supplementary Table 1. Information on 339 common bean genotypes used in the molecular characterization.
ID Embrapa Germplasm Bank	Access	Germplasm type	Grain color	GW (100 gr)§	Seed size	Country	Brazilian regions	Structure
BGF0011763	CF800016	Landrace	Mulatinho	21.85	S	Brazil	Southeast region	ADM
BGF0011764	CF800017	Landrace	Brown	19.63	S	Brazil	Southeast region	ADM
BGF0011772	CF800025	Landrace	Purple	17.07	S	Brazil	Southeast region	ADM
BGF0011774	CF800027	Landrace	Purple	17.16	S	Brazil	Southeast region	ADM
BGF0011779	CF800032	Landrace	Carioca**	25.25	M	Brazil	Southeast region	ADM
BGF0011835	CF800088	Landrace	Yellow	29.75	M	Brazil	North region	ADM
BGF0011839	CF800093	Landrace	Yellow	26.1	M	Brazil	North region	ADM
BGF0011883	CF800139	Landrace	Preto	16.34	S	Brazil	South region	ADM
BGF0011927	CF800188	Landrace	Black	18.36	S	Brazil	South region	ADM
BGF0011937	CF800198	Landrace	Brown	19.75	S	Brazil	Southeast region	ADM
BGF0012054	CF800318	Landrace	Brown	20.95	S	Brazil	Southeast region	ADM
BGF0012094	CF800361	Landrace	Brown	17.88	S	Brazil	South region	ADM
BGF0012122	CF800392	Landrace	White	26.48	M	Brazil	South region	ADM
BGF0012454	CF810241	Landrace	Brown	22.08	S	Brazil	Northeast regions	ADM
BGF0012469	CF810256	Landrace	Mulatinho	17.84	S	Brazil	Northeast regions	ADM
BGF0012685	CF810472	Landrace	Brown	18.39	S	Brazil	Northeast regions	ADM
BGF0012734	CF830015	Landrace	Striped	16.52	S	Brazil	South region	ADM
BGF0012848	CF830129	Landrace	Carioca	22.93	S	Brazil	South region	ADM
BGF0012904	CF830185	Landrace	Black	20.77	S	Brazil	South region	ADM
BGF0012955	CF830236	Landrace	White	25.6	M	Brazil	Northeast regions	ADM
BGF0012993	CF830274	Landrace	Brown	23.9	S	Brazil	Southeast region	ADM
BGF0013301	CF840018	Landrace	Brown	30.61	M	Brazil	South region	ADM
BGF0013306	CF840023	Landrace	White	32.18	M	Brazil	South region	ADM
BGF0013307	CF840024	Landrace	Brown	39.79	M	Brazil	South region	ADM
BGF0013323	CF840040	Landrace	Brown	23.23	S	Brazil	South region	ADM
BGF0013330	CF840047	Landrace	Mulatinho	22.41	S	Brazil	South region	ADM
BGF0013336	CF840053	Landrace	Mulatinho	18.61	S	Brazil	South region	ADM
BGF0013340	CF840057	Landrace	Brown	16.36	S	Brazil	South region	ADM
BGF0013516	CF840233	Landrace	Pink	27.69	M	Brazil	South region	ADM
BGF0013522	CF840239	Landrace	Black	15.63	S	Brazil	South region	ADM
BGF0013558	CF840275	Landrace	White	24.1	S	Brazil	South region	ADM
BGF0013560	CF840277	Landrace	Mulatinho	30.08	M	Brazil	South region	ADM
BGF0013561	CF840278	Landrace	Brown	23.63	S	Brazil	South region	ADM
BGF0013611	CF840328	Landrace	Black	13.73	S	Brazil	South region	ADM
BGF0013859	CF840584	Landrace	Black	16.08	S	Brazil	Southeast region	ADM
BGF0013870	CF840595	Landrace	Mulatinho	24.29	S	Brazil	Southeast region	ADM
BGF0013882	CF840607	Landrace	Red	18.71	S	Brazil	Southeast region	ADM
BGF0013931	CF840656	Landrace	Brown	16.41	S	Brazil	Southeast region	ADM
BGF0014299	CF841024	Landrace	Yellow	17.56	S	Brazil	Southeast region	ADM
BGF0014582	CF841307	Landrace	Brown	19.08	S	Brazil	Central-West region	ADM
BGF0014723	CF860105	Landrace	Carioca	17.12	S	Brazil	North region	ADM
BGF0015442	CF871172	Landrace	Brown	30.51	M	Brazil	Southeast region	ADM
BGF0015605	CF880067	Landrace	White	21.14	S	Brazil	Northeast regions	ADM
BGF0015655	CF880117	Landrace	White	20.06	S	Brazil	Northeast regions	ADM
BGF0015804	CF890110	Landrace	Brown	19.09	S	Brazil	Southeast region	ADM
BGF0015864	CF890170	Landrace	Mulatinho	20.29	S	Brazil	Central-West region	ADM
BGF0015873	CF890179	Landrace	Striped	22.66	S	Brazil	Central-West region	ADM
BGF0015900	CF890206	Landrace	Yellow	16.16	S	Brazil	Central-West region	ADM
BGF0015917	CF890223	Landrace	Brown	17.97	S	Brazil	Central-West region	ADM
BGF0015997	CF200005	Landrace	Striped	29.36	M	Brazil	North region	ADM
BGF0015998	CF200006	Landrace	Red	25.8	M	Brazil	Southeast region	ADM
BGF0015999	CF200007	Landrace	Carioca	19.02	S	Brazil	Central-West region	ADM
BGF0016002	CF200010	Landrace	Pink	15.62	S	Brazil	South region	ADM
BGF0016004	CF200012	Landrace	Black	19.98	S	Brazil	South region	ADM
BGF0016007	CF200015	Landrace	Black	19.04	S	Brazil	South region	ADM
BGF0016010	CF200018	Landrace	Black	20.5	S	Brazil	South region	ADM
BGF0016035	CF200043	Landrace	Striped	17.63	S	Brazil	South region	ADM
BGF0016062	CF200070	Landrace	Brown	21.11	S	Brazil	South region	ADM
BGF0016063	CF200071	Landrace	Black	21.45	S	Brazil	South region	ADM
BGF0016064	CF200072	Landrace	Carioca	23.62	S	Brazil	South region	ADM
BGF0016065	CF200073	Landrace	Brown	33.18	M	Brazil	South region	ADM
BGF0016066	CF200074	Landrace	Brown	17.84	S	Brazil	South region	ADM
BGF0016067	CF200075	Landrace	Brown	15.39	S	Brazil	South region	ADM
BGF0016074	CF200082	Landrace	Red	21.6	S	Brazil	South region	ADM
BGF0016084	CF210002	Landrace	Brown	19.7	S	Brazil	Southeast region	ADM
BGF0016090	CF220277	Landrace	Red	20.64	S	Brazil	Southeast region	ADM
BGF0016092	CF220279	Landrace	Black	18.44	S	Brazil	Southeast region	ADM
BGF0016130	CF240004	Landrace	Red	26.96	M	Brazil	Southeast region	ADM
BGF0016131	CF240005	Landrace	Carioca	25.22	M	Brazil	Southeast region	ADM
BGF0016139	CF240013	Landrace	Brown	24.65	S	Brazil	Southeast region	ADM
BGF0016158	CF240032	Landrace	Black	38.3	M	Brazil	Southeast region	ADM
BGF0016210	CF240080	Landrace	Brown	27.39	M	Brazil	Southeast region	ADM
BGF0016214	CF240084	Landrace	Red	22.12	S	Brazil	Southeast region	ADM
BGF0016277	CF250033	Landrace	Yellow	21.53	S	Brazil	South region	ADM
BGF0011748	CF800001	Landrace	Mulatinho*	20.7	S	Brazil	Southeast region	ADM***
BGF0011750	CF800003	Landrace	Mulatinho	16.4	S	Brazil	Southeast region	M1
BGF0011789	CF800042	Landrace	Black	20.1	S	Brazil	Southeast region	M1
BGF0011843	CF800099	Landrace	Black	15.2	S	Brazil	South region	M1
BGF0011854	CF800110	Landrace	Black	16.75	S	Brazil	South region	M1
BGF0011856	CF800112	Landrace	Black	22.46	S	Brazil	South region	M1
BGF0011862	CF800118	Landrace	Black	20.5	S	Brazil	South region	M1
BGF0011867	CF800123	Landrace	Mulatinho	17.81	S	Brazil	South region	M1
BGF0011874	CF800130	Landrace	Black	19.1215	S	Brazil	South region	M1
BGF0011987	CF800250	Landrace	Brown	18.84	S	Brazil	Southeast region	M1
BGF0012265	CF810052	Landrace	Brown	17.48	S	Brazil	Central-West region	M1
BGF0012448	CF810235	Landrace	Black	18.3799	S	Brazil	not available	M1
BGF0012803	CF830084	Landrace	Carioca	21.64	S	Brazil	South region	M1
BGF0012950	CF830231	Landrace	Black	22.8	S	Brazil	Northeast regions	M1
BGF0013010	CF830291	Landrace	Black	19.9	S	Brazil	Southeast region	M1
BGF0013021	CF830302	Landrace	Black	15.75	S	Brazil	Southeast region	M1
BGF0013401	CF840118	Landrace	White	16.22	S	Brazil	South region	M1
BGF0013505	CF840222	Landrace	Pink	22.8	S	Brazil	South region	M1
BGF0013867	CF840592	Landrace	Brown	21.6234	S	Brazil	Southeast region	M1
BGF0013928	CF840653	Landrace	Black	17.75	S	Brazil	Southeast region	M1
BGF0015555	CF880017	Landrace	Mulatinho	19.45	S	Brazil	Northeast regions	M1
BGF0015657	CF880119	Landrace	Black	17.78	S	Brazil	Northeast regions	M1
BGF0015682	CF880144	Landrace	Black	21.29	S	Brazil	Northeast regions	M1
BGF0016005	CF200013	Landrace	Black	20.36	S	Brazil	South region	M1
BGF0016029	CF200037	Landrace	Black	16.59	S	Brazil	South region	M1
BGF0016034	CF200042	Landrace	Black	41.07	L	Brazil	South region	M1
BGF0016081	CF200089	Landrace	Black	15.96	S	Brazil	Southeast region	M1
BGF0016082	CF200090	Landrace	Dark brown	24.08	S	Brazil	Southeast region	M1
BGF0016123	CF230028	Landrace	Black	15.87	S	Brazil	Central-West region	M1
BGF0016138	CF240012	Landrace	Black	20.02	S	Brazil	Southeast region	M1
BGF0016142	CF240016	Landrace	Black	22.56	S	Brazil	Southeast region	M1
BGF0016165	CF240039	Landrace	Black	22.91	S	Brazil	Southeast region	M1
BGF0016177	CF240051	Landrace	Black	20.02	S	Brazil	South region	M1
BGF0016182	CF240056	Landrace	Black	20.41	S	Brazil	South region	M1
BGF0016209	CF240079	Landrace	Black	19.8	S	Brazil	Southeast region	M1
BGF0012528	CF810315	Landrace	Striped	33.66	M	Brazil	Northeast regions	M2
BGF0013901	CF840626	Landrace	Pink	14.02	S	Brazil	Southeast region	M2
BGF0013906	CF840631	Landrace	Carioca	37.26	M	Brazil	Southeast region	M2
BGF0014678	CF860060	Landrace	Yellow	28.63	M	Brazil	Central-West region	M2
BGF0016246	CF250002	Landrace	Brown-black striped	37.22	M	Brazil	South region	M2
BGF0011751	CF800004	Landrace	Purple	21.2	S	Brazil	Southeast region	M3
BGF0011753	CF800006	Landrace	Brown	25.51	M	Brazil	Southeast region	M3
BGF0011757	CF800010	Landrace	Mulatinho	21.15	S	Brazil	Southeast region	M3
BGF0011762	CF800015	Landrace	Light brown	16.76	S	Brazil	Southeast region	M3
BGF0011778	CF800031	Landrace	Carioca	21.24	S	Brazil	Southeast region	M3
BGF0011780	CF800033	Landrace	Brown	21.3	S	Brazil	Southeast region	M3
BGF0011782	CF800035	Landrace	Purple	26.82	M	Brazil	Southeast region	M3
BGF0011840	CF800096	Landrace	Brown	25	M	Brazil	South region	M3
BGF0011855	CF800111	Landrace	Pink	15.07	S	Brazil	South region	M3
BGF0011857	CF800113	Landrace	Brown	16.48	S	Brazil	South region	M3
BGF0011859	CF800115	Landrace	Purple	14.34	S	Brazil	South region	M3
BGF0011861	CF800117	Landrace	Mulatinho	21.6	S	Brazil	South region	M3
BGF0011863	CF800119	Landrace	Carioca	20.11	S	Brazil	South region	M3
BGF0011865	CF800121	Landrace	Brown	22.21	S	Brazil	South region	M3
BGF0011932	CF800193	Landrace	Brown	18.37	S	Brazil	Southeast region	M3
BGF0011966	CF800229	Landrace	Black	32.99	M	Brazil	Southeast region	M3
BGF0012051	CF800315	Landrace	Purple	16.62	S	Brazil	Southeast region	M3
BGF0012141	CF800414	Landrace	Mulatinho	16.38	S	Brazil	Northeast regions	M3
BGF0012148	CF800421	Landrace	Pink	16.67	S	Brazil	Southeast region	M3
BGF0012150	CF800423	Landrace	Mulatinho	18.1	S	Brazil	Northeast regions	M3
BGF0012220	CF810007	Landrace	Yellow	23.26	S	Brazil	Central-West region	M3
BGF0012231	CF810018	Landrace	Purple	17.48	S	Brazil	Central-West region	M3
BGF0012247	CF810034	Landrace	Pink	20.94	S	Brazil	Central-West region	M3
BGF0012279	CF810066	Landrace	Yellow	20.06	S	Brazil	Central-West region	M3
BGF0012282	CF810069	Landrace	Purple	20.37	S	Brazil	Central-West region	M3
BGF0012293	CF810080	Landrace	Mulatinho	20.84	S	Brazil	Central-West region	M3
BGF0012301	CF810088	Landrace	Mulatinho	15.37	S	Brazil	Central-West region	M3
BGF0012347	CF810134	Landrace	Mulatinho	17.5	S	Brazil	Central-West region	M3
BGF0012425	CF810212	Landrace	Yellow	19.74	S	Brazil	Central-West region	M3
BGF0012459	CF810246	Landrace	Mulatinho	22.41	S	Brazil	Northeast regions	M3
BGF0012526	CF810313	Landrace	Brown	24.3	S	Brazil	Northeast regions	M3
BGF0012533	CF810320	Landrace	Mulatinho	28.66	M	Brazil	Northeast regions	M3
BGF0012538	CF810325	Landrace	Striped	19.62	S	Brazil	Northeast regions	M3
BGF0012563	CF810350	Landrace	Mulatinho	38.25	M	Brazil	Northeast regions	M3
BGF0012584	CF810371	Landrace	Carioca	21.03	S	Brazil	Northeast regions	M3
BGF0012753	CF830034	Landrace	Mulatinho	26.24	M	Brazil	South region	M3
BGF0012774	CF830055	Landrace	Mulatinho	23.46	S	Brazil	South region	M3
BGF0012791	CF830072	Landrace	Purple	18.71	S	Brazil	South region	M3
BGF0012817	CF830098	Landrace	Brown	21.75	S	Brazil	South region	M3
BGF0012945	CF830226	Landrace	Mulatinho	24	S	Brazil	Northeast regions	M3
BGF0012951	CF830232	Landrace	Yellow	15.33	S	Brazil	Northeast regions	M3
BGF0012956	CF830237	Landrace	Brown	20.6	S	Brazil	Northeast regions	M3
BGF0013003	CF830284	Landrace	Yellow	16.21	S	Brazil	Southeast region	M3
BGF0013047	CF830328	Landrace	Brown	25.1	M	Brazil	Southeast region	M3
BGF0013294	CF840011	Landrace	Black	14.68	S	Brazil	South region	M3
BGF0013343	CF840060	Landrace	Pink	18.75	S	Brazil	South region	M3
BGF0013344	CF840061	Landrace	Brown	17.35	S	Brazil	South region	M3
BGF0013346	CF840063	Landrace	Carioca	24.77	S	Brazil	South region	M3
BGF0013355	CF840072	Landrace	Carioca	18.17	S	Brazil	South region	M3
BGF0013372	CF840089	Landrace	Purple	27.72	M	Brazil	South region	M3
BGF0013491	CF840208	Landrace	Pink	25.34	M	Brazil	South region	M3
BGF0013536	CF840253	Landrace	Striped	14.74	S	Brazil	South region	M3
BGF0013542	CF840259	Landrace	Brown	17.88	S	Brazil	South region	M3
BGF0013544	CF840261	Landrace	Striped	17.48	S	Brazil	South region	M3
BGF0013575	CF840292	Landrace	Brown	27.61	M	Brazil	South region	M3
BGF0013687	CF840404	Landrace	Cream-colored striped	18.86	S	Brazil	Northeast regions	M3
BGF0013734	CF840451	Landrace	Carioca	24.58	S	Brazil	Northeast regions	M3
BGF0013759	CF840476	Landrace	Brown	24.13	S	Brazil	Northeast regions	M3
BGF0013826	CF840543	Landrace	Purple	17.62	S	Brazil	Northeast regions	M3
BGF0013861	CF840586	Landrace	Purple	16.52	S	Brazil	Southeast region	M3
BGF0013875	CF840600	Landrace	Red-beige striped	24.78	S	Brazil	South region	M3
BGF0013920	CF840645	Landrace	Red	20.15	S	Brazil	Southeast region	M3
BGF0013955	CF840680	Landrace	Carioca	16.8	S	Brazil	Southeast region	M3
BGF0014022	CF840747	Landrace	Mulatinho	15.68	S	Brazil	Southeast region	M3
BGF0014086	CF840811	Landrace	Pink	12.48	S	Brazil	Southeast region	M3
BGF0014413	CF841138	Landrace	Carioca	23.12	S	Brazil	Southeast region	M3
BGF0014502	CF841226	Landrace	Yellow	20.64	S	Brazil	Southeast region	M3
BGF0014697	CF860079	Landrace	Yellow	17.29	S	Brazil	Southeast region	M3
BGF0014722	CF860104	Landrace	Yellow	17.42	S	Brazil	North region	M3
BGF0014773	CF870030	Landrace	Pink	23.3	S	Brazil	Southeast region	M3
BGF0014864	CF870147	Landrace	Striped	18.33	S	Brazil	Southeast region	M3
BGF0014865	CF870148	Landrace	Brown	22.99	S	Brazil	Southeast region	M3
BGF0015009	CF870398	Landrace	Carioca	19.83	S	Brazil	Southeast region	M3
BGF0015036	CF870447	Landrace	Red	17.34	S	Brazil	Southeast region	M3
BGF0015397	CF871127	Landrace	Pink	23.05	S	Brazil	Southeast region	M3
BGF0015405	CF871135	Landrace	Mulatinho	25.06	M	Brazil	Southeast region	M3
BGF0015473	CF871203	Landrace	Pink	18.28	S	Brazil	Central-West region	M3
BGF0015477	CF871207	Landrace	Carioca	19.79	S	Brazil	Central-West region	M3
BGF0015492	CF871222	Landrace	Brown	21.53	S	Brazil	Central-West region	M3
BGF0015494	CF871224	Landrace	Light brown	21.34	S	Brazil	Central-West region	M3
BGF0015496	CF871226	Landrace	Pink	21.08	S	Brazil	Central-West region	M3
BGF0015532	CF871262	Landrace	Carioca	19.16	S	Brazil	Central-West region	M3
BGF0015540	CF880002	Landrace	Mulatinho	17.03	S	Brazil	Northeast regions	M3
BGF0015542	CF880004	Landrace	Mulatinho	24.47	S	Brazil	Northeast regions	M3
BGF0015549	CF880011	Landrace	Pink	17.6	S	Brazil	Northeast regions	M3
BGF0015566	CF880028	Landrace	Mulatinho	22.08	S	Brazil	Northeast regions	M3
BGF0015601	CF880063	Landrace	Mulatinho	20.3	S	Brazil	Northeast regions	M3
BGF0015609	CF880071	Landrace	Carioca	22.28	S	Brazil	Northeast regions	M3
BGF0015667	CF880129	Landrace	Mulatinho	20.7	S	Brazil	Northeast regions	M3
BGF0015857	CF890163	Landrace	Carioca	20.23	S	Brazil	Central-West region	M3
BGF0015887	CF890193	Landrace	Carioca	18.34	S	Brazil	Central-West region	M3
BGF0015893	CF890199	Landrace	Carioca	19.16	S	Brazil	Central-West region	M3
BGF0015908	CF890214	Landrace	Pink	18.17	S	Brazil	Central-West region	M3
BGF0015931	CF890237	Landrace	Mulatinho	18.88	S	Brazil	Northeast regions	M3
BGF0015933	CF890239	Landrace	Mulatinho	23.18	S	Brazil	Northeast regions	M3
BGF0015954	CF950003	Landrace	Yellow	15.7	S	Brazil	Central-West region	M3
BGF0015995	CF200003	Landrace	Yellow	29.1	M	Brazil	North region	M3
BGF0016069	CF200077	Landrace	Carioca	22.68	S	Brazil	Southeast region	M3
BGF0016078	CF200086	Landrace	Pink	21.19	S	Brazil	South region	M3
BGF0016089	CF220276	Landrace	Carioca	24.76	S	Brazil	Central-West region	M3
BGF0016124	CF230029	Landrace	Yellow	19.16	S	Brazil	Central-West region	M3
BGF0016125	CF230030	Landrace	Purple	21.09	S	Brazil	Central-West region	M3
BGF0016128	CF240002	Landrace	Pink	18.13	S	Brazil	North region	M3
BGF0016134	CF240008	Landrace	Carioca	26.28	M	Brazil	Southeast region	M3
BGF0016146	CF240020	Landrace	Mulatinho	24.32	S	Brazil	Southeast region	M3
BGF0016174	CF240048	Landrace	Pink	29.7	M	Brazil	Southeast region	M3
BGF0016204	CF240074	Landrace	Pink	23.64	S	Brazil	Southeast region	M3
BGF0016217	CF240087	Landrace	Pink	23.56	S	Brazil	Southeast region	M3
BGF0016220	CF240090	Landrace	Purple	20.78	S	Brazil	Southeast region	M3
BGF0016227	CF240097	Landrace	Red	21.4947	S	Brazil	Southeast region	M3
BGF0000158	CNF000158	Cultivar/Line	Black	16.7194	S	Brazil		ADM
BGF0000480	CNF000480	Cultivar/Line	Black	25.3175	M	Honduras		ADM
BGF0001115	CNF001115	Cultivar/Line	Mulatinho	16.2596	S	Brazil		ADM
BGF0002147	CNF002147	Cultivar/Line	Mulatinho	26.0835	M	Colombia		ADM
BGF0003225	CNF003225	Cultivar/Line	Carioca	23.27	S	Brazil		ADM
BGF0004108	CNF004108	Cultivar/Line	Carioca	23.38	S	Colombia		ADM
BGF0004108	Ruda	Cultivar/Line	Carioca	23.18	S	Colombia		ADM
BGF0004856	CNF004856	Cultivar/Line	Pink	16.8566	S	Brazil		ADM
BGF0005042	CNF005042	Cultivar/Line	Purple	17.7613	S	Brazil		ADM
BGF0005494	CNF005494	Cultivar/Line	Black	26.8615	M	Brazil		ADM
BGF0005520	CNF005520	Cultivar/Line	Mulatinho	27.0915	M	Brazil		ADM
BGF0005533	CNF005533	Cultivar/Line	Mulatinho	20.95	S	Colombia		ADM
BGF0005613	CNF005613	Cultivar/Line	Carioca	25.3133	M	Brazil		ADM
BGF0005645	CNF005645	Cultivar/Line	Beige-brown striped	22.8024	S	USA		ADM
BGF0005824	CNF005824	Cultivar/Line	Carioca	20.9489	S	Brazil		ADM
BGF0005887	CNF005887	Cultivar/Line	Carioca	24.1891	S	Brazil		ADM
BGF0006475	CNF006475	Cultivar/Line	Cream-colored striped	23.3228	S	Kenya		ADM
BGF0006514	CNF006514	Cultivar/Line	Purple	22.1916	S	USA		ADM
BGF0006662	CNF006662	Cultivar/Line	Striped	34.8133	M	Chile		ADM
BGF0006737	CNF006737	Cultivar/Line	Beige/Yellow	20.9861	S	Portugal		ADM
BGF0006772	CNF006772	Cultivar/Line	Carioca	24.4802	S	Brazil		ADM
BGF0006958	CNF006958	Cultivar/Line	Purple	20.5	S	Brazil		ADM
BGF0007098	CNF007098	Cultivar/Line	Carioca	28.7902	M	Brazil		ADM
BGF0007131	CNF007131	Cultivar/Line	Carioca	23.2089	S	Brazil		ADM
BGF0007135	CNF007135	Cultivar/Line	Mulatinho	27.4549	M	Brazil		ADM
BGF0007533	CNF007533	Cultivar/Line	Black	26.3472	M	Brazil		ADM
BGF0007552	CNF007552	Cultivar/Line	Pink	21.5654	S	Brazil		ADM
BGF0007770	CNF007770	Cultivar/Line	White	29.0345	M	Mexico		ADM
BGF0007806	CNF007806	Cultivar/Line	Carioca	23.7191	S	Brazil		ADM
BGF0007813	CNF007813	Cultivar/Line	Carioca	22.4371	S	Brazil		ADM
BGF0007844	CNF007844	Cultivar/Line	Carioca	22	S	Brazil		ADM
BGF0007845	CNF007845	Cultivar/Line	Carioca	22.9096	S	Brazil		ADM
BGF0007893	CNF007893	Cultivar/Line	Mulatinho	24.5641	S	Brazil		ADM
BGF0008202	CNF008202	Cultivar/Line	Carioca	23.4102	S	Brazil		ADM
BGF0008803	CNF008803	Cultivar/Line	White	39.9059	M	Colombia		ADM
BGF0008845	CNF008845	Cultivar/Line	Black	28.87	M	Colombia		ADM
BGF0009595	CNF009595	Cultivar/Line	Carioca	17.5182	S	Brazil		ADM
BGF0010013	CNF010013	Cultivar/Line	Carioca	25.87	M	Brazil		ADM
BGF0010324	CNF010324	Cultivar/Line	Carioca	20.4426	S	Brazil		ADM
BGF0011035	CNF011035	Cultivar/Line	Dark brown	18.4658	S	Honduras		ADM
BGF0011036	CNF011036	Cultivar/Line	Brown	28.4336	M	Japan		ADM
BGF0011273	CNF011274	Cultivar/Line	White	22.5451	S	Spain		ADM
BGF0011347	CNF011348	Cultivar/Line	Brown	27.86	M	Colombia		ADM
BGF0011360	CNF011361	Cultivar/Line	Red	27.3921	M	Colombia		ADM
BGF0011486	CNF011487	Cultivar/Line	Striped	30	M	Colombia		ADM
BGF0011495	CNF011496	Cultivar/Line	White	21.68	S	Colombia		ADM
BGF0018670	BRS Cometa	Cultivar/Line	Carioca	24.296	S	Brazil		ADM
BGF0018672	BRS Estilo	Cultivar/Line	Carioca	26	M	Brazil		ADM
BGF0018679	CNFC10408	Cultivar/Line	Carioca	25.3	M	Brazil		ADM
BGF0018683	GUARÁ	Cultivar/Line	Carioca	30.55	M	Brazil		ADM
BGF0019706	CNF008075	Cultivar/Line	Carioca	27.03	M	Brazil		ADM
BGF0019708	CNFC7827	Cultivar/Line	Carioca	26.77	M	Brazil		ADM
BGF0019709	CNFC9518	Cultivar/Line	Carioca	22.27	S	Brazil		ADM
BGF0000544	CNF000544	Cultivar/Line	Carioca	-	-	Brazil		M1
BGF0000835	CNF000835	Cultivar/Line	Black	16.4209	S	Colombia		M1
BGF0000842	CNF000842	Cultivar/Line	Black	22.7257	S	Colombia		M1
BGF0001555	CNF001555	Cultivar/Line	Purple	18.8386	S	Colombia		M1
BGF0001562	CNF001562	Cultivar/Line	Black	24.1039	S	El Salvador		M1
BGF0001569	CNF001569	Cultivar/Line	Black	26.2136	M	Guatemala		M1
BGF0001591	CNF001591	Cultivar/Line	Black	20.9659	S	Germany		M1
BGF0002035	CNF002035	Cultivar/Line	Black	18.674	S	Brazil		M1
BGF0004121	CNF004121	Cultivar/Line	Black	24.34	S	Colombia		M1
BGF0004514	CNF004514	Cultivar/Line	Black	26.4743	M	Colombia		M1
BGF0004582	CNF004582	Cultivar/Line	Black	19.2297	S	Brazil		M1
BGF0004640	CNF004640	Cultivar/Line	Black	23.0962	S	Brazil		M1
BGF0004681	CNF004681	Cultivar/Line	Black	21.7511	S	Colombia		M1
BGF0004903	CNF004903	Cultivar/Line	Red	16.5024	S	Colombia		M1
BGF0005455	CNF005455	Cultivar/Line	Mulatinho	21.0693	S	Brazil		M1
BGF0005482	CNF005482	Cultivar/Line	Black	19.6205	S	Brazil		M1
BGF0005484	CNF005484	Cultivar/Line	Black	13.9117	S	Colombia		M1
BGF0005493	CNF005493	Cultivar/Line	Black	20.29	S	Colombia		M1
BGF0005598	CNF005598	Cultivar/Line	Black	17.4766	S	Brazil		M1
BGF0005601	CNF005601	Cultivar/Line	Mulatinho	15.8481	S	Brazil		M1
BGF0005605	CNF005605	Cultivar/Line	Black	22.5516	S	Brazil		M1
BGF0005606	CNF005606	Cultivar/Line	Black	16.7805	S	Brazil		M1
BGF0005609	CNF005609	Cultivar/Line	Mulatinho	12.8013	S	Brazil		M1
BGF0005823	CNF005823	Cultivar/Line	Striped	27.7817	M	Brazil		M1
BGF0005923	CNF005923	Cultivar/Line	Black	20.658	S	Brazil		M1
BGF0005929	CNF005929	Cultivar/Line	Black	19.3229	S	Brazil		M1
BGF0006122	CNF006122	Cultivar/Line	Black	25.9	M	Colombia		M1
BGF0006604	CNF006604	Cultivar/Line	Black	21.48	S	Brazil		M1
BGF0006760	CNF006760	Cultivar/Line	Mulatinho	18.8624	S	Brazil		M1
BGF0006872	CNF006872	Cultivar/Line	Black	19.6593	S	Brazil		M1
BGF0007057	CNF007057	Cultivar/Line	Black	20.4865	S	Brazil		M1
BGF0007090	CNF007090	Cultivar/Line	Black	18.2828	S	Brazil		M1
BGF0007133	CNF007133	Cultivar/Line	Carioca	28	M	Brazil		M1
BGF0007143	CNF007143	Cultivar/Line	Black	24.3053	S	Brazil		M1
BGF0007359	CNF007359	Cultivar/Line	Black	16.1708	S	Brazil		M1
BGF0007382	CNF007382	Cultivar/Line	Black	21.2227	S	Brazil		M1
BGF0007559	CNF007559	Cultivar/Line	Mulatinho	22	S	Brazil		M1
BGF0007560	CNF007560	Cultivar/Line	Black	22.0286	S	Brazil		M1
BGF0007560	BRSValente	Cultivar/Line	Black	22.0286	S	Brazil		M1
BGF0007800	CNF007800	Cultivar/Line	Black	20.425	S	Colombia		M1
BGF0007866	CNF007866	Cultivar/Line	Purple	22.2516	S	Brazil		M1
BGF0007907	CNF007907	Cultivar/Line	Black	16.9083	S	Brazil		M1
BGF0008104	CNF008104	Cultivar/Line	Black	25.1091	M	Brazil		M1
BGF0008193	CNF008193	Cultivar/Line	Carioca	25.3	M	Colombia		M1
BGF0008944	CNF008944	Cultivar/Line	Carioca	27.18	M	Brazil		M1
BGF0009165	CNF009165	Cultivar/Line	Black	-	-	Brazil		M1
BGF0010003	CNF010003	Cultivar/Line	Black	24.8324	S	Brazil		M1
BGF0010015	BRSMG Talismã	Cultivar/Line	Carioca	20.9769	S	Brazil		M1
BGF0010316	CNF010316	Cultivar/Line	Mulatinho	22.1252	S	Colombia		M1
BGF0011743	CNF011743	Cultivar/Line	Black	16.2474	S	Brazil		M1
BGF0019696	IAC Diplomata	Cultivar/Line	Black	21.06	S	Brazil		M1
BGF0019707	CNFC10280	Cultivar/Line	Carioca	24	S	Brazil		M1
BGF0019710	CNFP7777	Cultivar/Line	Black	19.2	S	Brazil		M1
BGF0019711	CNFP8096	Cultivar/Line	Black	23.12	S	Brazil		M1
BGF0006497	CNF006497	Cultivar/Line	Striped	41.6428	L	Zambia		M2
BGF0011254	CNF011257	Cultivar/Line	Light pink	47	L	Colombia		M2
BGF0006777	CNF006777	Cultivar/Line	Others	21.3932	S	Brazil		M3
BGF0007050	CNF007050	Cultivar/Line	Purple	26.0937	M	Brazil		M3
BGF0007137	CNF007137	Cultivar/Line	Carioca	24.0475	S	Brazil		M3
BGF0007569	CNF007569	Cultivar/Line	Carioca	19.0407	S	Brazil		M3
BGF0007904	CNF007904	Cultivar/Line	Carioca	19.051	S	Brazil		M3
BGF0007905	CNF007905	Cultivar/Line	Mulatinho	28.375	M	Mexico		M3
§ <25 g 100-seed weight−1: Small size; 25–40 g 100-seed weight−1: Medium size; >40 g 100-seed weight−1: Large size
*Mulatinho: cream-colored; **Carioca: beige with brown stripes; ***ADM: admixture
