# Supplementary material for: Genome-Wide Association Studies Detect Multiple QTLs for Productivity in Mesoamerican Diversity Panel of Common Bean Under Drought Stress
Source: Front Plant Sci. 2020 Nov 12;11:574674. doi: 10.3389/fpls.2020.574674 (PMC7738703; doi:10.3389/fpls.2020.574674)
Supplement: Supplementary file 10 [file Table_8.xlsx]

## Sheet: Plan3
Supplementary Table 8. Single-model SNP GWAS with significant markers associated with seed yield under drought and irrigation conditions for all experiments and joint analysis.
Trait	Marker ID	Marker type	Chr	Position	p-value	BONF	FDR_BH	Marker R2 (%)1	Alleles2	MAF3	Effect4
YIELD_DROUGHT_SINGLE_SNP_2016	¥S01_1572065	Capture-SNP	1	1572065	2.30993e-06	0.0114137	0.0114137	11.5576	A/G	0.0747664	-327.213
YIELD_DROUGHT_SINGLE_SNP_JOINT	3374398	Dart-probe	7	9164388	8.82e-05	0.435796	0.0482242	4.99684	G/A	0.0630915	-88.5404
YIELD_DROUGHT_SINGLE_SNP_JOINT	&3370686_F_0_22_G_C	Dart-SNP	11	53396750	9.76e-05	0.482242	0.0482242	5.90183	C/G	0.0576324	-252.423
YIELD_DROUGHT_SINGLE_SNP_JOINT	&3371424	Dart-probe	8	60713295	1.56e-05	0.0770796	0.0319518	6.05121	G/A	0.120253	65.0485
YIELD_DROUGHT_SINGLE_SNP_JOINT	*3383065_F_0_30_T_C	Dart-SNP	7	28254457	4.54e-05	0.224321	0.0373869	6.40763	C/T	0.376947	-222.775
YIELD_DROUGHT_SINGLE_SNP_JOINT	*3383887_F_0_14_C_T	Dart-SNP	10	42372603	1.94e-05	0.0958554	0.0319518	5.83958	C/T	0.0560748	-94.19
YIELD_DROUGHT_SINGLE_SNP_JOINT	*3383892_F_0_67_T_G	Dart-SNP	2	34986412	6.16e-05	0.304366	0.0434808	6.20575	T/G	0.378505	-276.184
YIELD_DROUGHT_SINGLE_SNP_JOINT	3383920_F_0_18_C_T	Dart-SNP	11	468512	3.87e-05	0.191217	0.0373869	6.51285	C/T	0.0747664	-14.5418
YIELD_DROUGHT_SINGLE_SNP_JOINT	*3384331_F_0_44_T_A	Dart-SNP	6	3414375	8.04e-05	0.397256	0.0482242	6.02977	T/A	0.394081	73.0157
YIELD_DROUGHT_SINGLE_SNP_JOINT	¥S01_1572065	Capture-SNP	1	1572065	7.34e-07	0.00362669	0.00362669	7.92542	A/G	0.0761246	-96.1665
YIELD_DROUGHT_SINGLE_SNP_JOINT	S11_51896602	Capture-SNP	11	51896602	3.4e-05	0.167994	0.0373869	5.48738	A/G	0.168224	-43.736
YIELD_IRRIGATED_SINGLE_SNP_2016	*3369849	Dart-probe	4	8250640	2.74e-05	0.135383	0.0451278	9.22927	G/A	0.0696517	505.24
YIELD_IRRIGATED_SINGLE_SNP_2016	8215509	Dart-probe	11	49365724	1.04e-06	0.00513864	0.00513864	12.9515	G/A	0.230392	-382.047
YIELD_IRRIGATED_SINGLE_SNP_2016	¥*3378800_F_0_41_G_A	Dart-SNP	3	48279384	4.61e-05	0.22778	0.045556	10.4104	G/A	0.278049	-809.558
YIELD_IRRIGATED_SINGLE_SNP_2016	3383931_F_0_55_C_G	Dart-SNP	11	51536991	5.85e-05	0.289048	0.0481748	8.35746	C/G	0.229268	-316.533
YIELD_IRRIGATED_SINGLE_SNP_2016	S08_61898258	Capture-SNP	8	61898258	1.84e-05	0.0909144	0.0451278	9.55121	T/G	0.390244	-326.447
YIELD_IRRIGATED_SINGLE_SNP_2016	S11_51740353	Capture-SNP	11	51740353	3.73e-05	0.184299	0.045556	10.6439	C/T	0.234146	164.48
YIELD_IRRIGATED_SINGLE_SNP_JOINT	*3367237	Dart-probe	8	60836738	4.79e-06	0.0236674	0.018677	6.78735	G/A	0.419048	95.1292
YIELD_IRRIGATED_SINGLE_SNP_JOINT	*3369459	Dart-probe	9	19542649	7.5e-05	0.370575	0.041175	4.99551	G/A	0.128527	118.389
YIELD_IRRIGATED_SINGLE_SNP_JOINT	3372534	Dart-probe	4	46983227	0.00012	0.59292	0.0455092	4.62227	G/A	0.095679	140.418
YIELD_IRRIGATED_SINGLE_SNP_JOINT	8207790	Dart-probe	8	9871104	2.86e-05	0.141313	0.0235521	5.61337	G/A	0.084375	-145.237
YIELD_IRRIGATED_SINGLE_SNP_JOINT	8214236	Dart-probe	4	46259791	0.000175	0.864675	0.0455092	4.48322	G/A	0.150943	-104.041
YIELD_IRRIGATED_SINGLE_SNP_JOINT	*13121017	Dart-probe	11	30419852	1.89e-05	0.0933849	0.018677	5.94394	G/A	0.0716511	-157.825
YIELD_IRRIGATED_SINGLE_SNP_JOINT	&3370686_F_0_22_G_C	Dart-SNP	11	53396750	9.18e-05	0.453584	0.0453584	5.82507	C/G	0.0582822	-462.073
YIELD_IRRIGATED_SINGLE_SNP_JOINT	&3371424	Dart-probe	8	60713295	1.02e-05	0.0503982	0.018677	6.19508	G/A	0.11838	135.086
YIELD_IRRIGATED_SINGLE_SNP_JOINT	¥*3378800_F_0_41_G_A	Dart-SNP	3	48279384	0.000121	0.597861	0.0455092	5.64835	G/A	0.292945	-301.42
YIELD_IRRIGATED_SINGLE_SNP_JOINT	3365860_F_0_54_T_C	Dart-SNP	2	27684053	0.000152	0.751032	0.0455092	4.47246	T/C	0.128834	124.16
YIELD_IRRIGATED_SINGLE_SNP_JOINT	3367382_F_0_60_G_A	Dart-SNP	8	2353738	6.24e-05	0.308318	0.041175	5.00957	G/A	0.0797546	-132.253
YIELD_IRRIGATED_SINGLE_SNP_JOINT	3378681_F_0_7_A_T	Dart-SNP	4	3906978	0.000172	0.849852	0.0455092	5.42252	A/T	0.27454	-99.9248
YIELD_IRRIGATED_SINGLE_SNP_JOINT	3379595_F_0_41_C_A	Dart-SNP	9	1145006	6.83e-05	0.33747	0.041175	4.95429	C/A	0.0521472	-156.974
YIELD_IRRIGATED_SINGLE_SNP_JOINT	3381766_F_0_44_T_G	Dart-SNP	2	581839	1.64e-05	0.0810324	0.018677	5.82672	T/G	0.0613497	-173.384
YIELD_IRRIGATED_SINGLE_SNP_JOINT	3382718_F_0_36_C_T	Dart-SNP	4	5831756	0.000138	0.681858	0.0455092	5.56109	C/T	0.102761	-531.951
YIELD_IRRIGATED_SINGLE_SNP_JOINT	3383203_F_0_31_G_A	Dart-SNP	4	19977945	0.000169	0.835029	0.0455092	5.43135	G/A	0.131902	0.131902
YIELD_IRRIGATED_SINGLE_SNP_JOINT	8214143_F_0_9_A_T	Dart-SNP	2	27534499	0.000157	0.775737	0.0455092	5.47956	T/A	0.108896	-63.9868
YIELD_IRRIGATED_SINGLE_SNP_JOINT	S04_4150451	Capture-SNP	4	4150451	0.000167	0.825147	0.0455092	4.41737	T/C	0.374233	-76.38
YIELD_IRRIGATED_SINGLE_SNP_JOINT	S08_45846990	Capture-SNP	8	45846990	0.000191	0.943731	0.0471866	5.35433	T/A	0.185583	17.35
YIELD_IRRIGATED_SINGLE_SNP_JOINT	S08_60778741	Capture-SNP	8	60778741	1.57e-05	0.0775737	0.018677	5.85342	A/G	0.466258	-95.0799
& common markres between irrigated and drought single-SNP model GWAS
* common between single-model SNP GWAS and segment-based GWAS analysis
¥ common within analysis (data analysed separated by year and joint-GWAS)
1R2 (%): Phenotypic variance explained.
2 Alleles: Major/Minor allele.
3MAF: Minor allele frequency.
4Effect: Major allele effect.
