# Supplementary material for: Genome-Wide Association Studies Detect Multiple QTLs for Productivity in Mesoamerican Diversity Panel of Common Bean Under Drought Stress
Source: Front Plant Sci. 2020 Nov 12;11:574674. doi: 10.3389/fpls.2020.574674 (PMC7738703; doi:10.3389/fpls.2020.574674)
Supplement: Supplementary file 13 [file Table_11.xlsx]

## Sheet: Plan1
Supplementary Table 11. Gene-based GWAS with signincant genes associated with 100-seed weight under drought and irrigation conditions for all experiments and joint analysis.
Trait	Gene	Chr	Gene_Start	Gene_End	No.SNPs	SNP_start	SNP_end	Gene_p-value	Gene_BONF	Gene_FDR_BH	TopSNP.Pvalue	TopSNP_ID	TopSNP_Start	TopSNP_End	Chisq(Obs)	Marker R2 (%)1	Pfam	Panther	KOG	ec	KO	GO	Best-hit-arabi-name	arabi-symbol	arabi-defline
SW_Drought_Gene_2014	Phvul.007G016500	7	1122192	1134167	3	3380130_F_0_66_G_A	8210783	1.51014e-05	0.153476	0.00444538	2.36e-07	S07_1139472	1110675	1177914	40.6818	26.9944	PF07714	PTHR23257,PTHR23257:SF347	KOG0192	2.7.12.1	0	GO:0006468,GO:0004672	AT4G38470.1	0	ACT-like protein tyrosine kinase family protein
SW_Drought_Gene_2014	Phvul.007G016600	7	1140970	1145070	3	3380130_F_0_66_G_A	8210783	1.51014e-05	0.153476	0.00444538	2.36e-07	S07_1139472	1110675	1177914	40.6818	26.9944	PF00924	PTHR31618,PTHR31618:SF1	0	0	0	GO:0055085,GO:0016020	AT1G78610.1	MSL6	mechanosensitive channel of small conductance-like 6
SW_Drought_Gene_2014	Phvul.007G016700	7	1145801	1146587	3	3380130_F_0_66_G_A	8210783	1.51014e-05	0.153476	0.00444538	2.36e-07	S07_1139472	1110675	1177914	40.6818	26.9944	PF01494	PTHR13789,PTHR13789:SF185	0	0	0	GO:0071949	AT5G05320.1	0	FAD/NAD(P)-binding oxidoreductase family protein
SW_Drought_Gene_2014	Phvul.007G016800	7	1147702	1151254	3	3380130_F_0_66_G_A	8210783	1.51014e-05	0.153476	0.00444538	2.36e-07	S07_1139472	1110675	1177914	40.6818	26.9944	0	0	0	2.7.11.1	0	0	AT5G40820.1	ATATR,ATR,ATRAD3	Ataxia telangiectasia-mutated and RAD3-related
SW_Drought_Gene_2014	Phvul.007G016900	7	1151027	1151257	3	3380130_F_0_66_G_A	8210783	1.51014e-05	0.153476	0.00444538	2.36e-07	S07_1139472	1110675	1177914	40.6818	26.9944	0	0	0	2.7.11.1	0	0	AT5G40820.1	ATATR,ATR,ATRAD3	Ataxia telangiectasia-mutated and RAD3-related
SW_Drought_Gene_2014	Phvul.007G017000	7	1151731	1160689	3	3380130_F_0_66_G_A	8210783	1.51014e-05	0.153476	0.00444538	2.36e-07	S07_1139472	1110675	1177914	40.6818	26.9944	PF02260,PF08064,PF00454,PF02259	PTHR11139,PTHR11139:SF69	0	2.7.11.1	K06640	GO:0005515,GO:0004674,GO:0016773	AT5G40820.1	ATATR,ATR,ATRAD3	Ataxia telangiectasia-mutated and RAD3-related
SW_Drought_Gene_2014	Phvul.007G017100	7	1159699	1162079	3	3380130_F_0_66_G_A	8210783	1.51014e-05	0.153476	0.00444538	2.36e-07	S07_1139472	1110675	1177914	40.6818	26.9944	PF01494	PTHR13789,PTHR13789:SF185	KOG2614	0	0	GO:0071949	AT5G05320.1	0	FAD/NAD(P)-binding oxidoreductase family protein
SW_Drought_Gene_2014	Phvul.006G188700	6	28897165	28902481	2	3378581_F_0_36_C_A	S06_28934587	1.42065e-05	0.144381	0.00444538	3.22e-05	3378581_F_0_36_C_A	28912493	28934587	33.3361	26.1102	0	PTHR31008,PTHR31008:SF6	0	0	0	0	AT1G61100.1	0	disease resistance protein (TIR class), putative
SW_Drought_Gene_2014	Phvul.006G188800	6	28914378	28915025	2	3378581_F_0_36_C_A	S06_28934587	1.42065e-05	0.144381	0.00444538	3.22e-05	3378581_F_0_36_C_A	28912493	28934587	33.3361	26.1102	PF01582	PTHR31008	0	0	0	GO:0007165,GO:0005515	AT1G61105.1	0	Toll-Interleukin-Resistance (TIR) domain family protein
SW_Drought_Gene_2014	Phvul.006G188900	6	28926895	28928671	2	3378581_F_0_36_C_A	S06_28934587	1.42065e-05	0.144381	0.00444538	3.22e-05	3378581_F_0_36_C_A	28912493	28934587	33.3361	26.1102	PF02365	PTHR31719,PTHR31719:SF29	0	0	0	GO:0006355,GO:0003677	AT1G61110.1	anac025,NAC025	NAC domain containing protein 25
SW_Drought_Gene_2014	Phvul.006G189000	6	28934047	28935145	2	3378581_F_0_36_C_A	S06_28934587	1.42065e-05	0.144381	0.00444538	3.22e-05	3378581_F_0_36_C_A	28912493	28934587	33.3361	26.1102	PF00378	PTHR11941,PTHR11941:SF84	0	0	0	GO:0008152,GO:0003824	AT4G14440.1	ATECI3,ECI3,HCD1	3-hydroxyacyl-CoA dehydratase 1
SW_Drought_Gene_2014	Phvul.006G189100	6	28936323	28940059	2	3378581_F_0_36_C_A	S06_28934587	1.42065e-05	0.144381	0.00444538	3.22e-05	3378581_F_0_36_C_A	28912493	28934587	33.3361	26.1102	PF00450	PTHR11802,PTHR11802:SF90	0	3.4.16.6	K16297	GO:0006508,GO:0004185	AT1G11080.2	scpl31	serine carboxypeptidase-like 31
SW_Drought_Gene_2014	Phvul.006G189200	6	28946152	28954296	2	3378581_F_0_36_C_A	S06_28934587	1.42065e-05	0.144381	0.00444538	3.22e-05	3378581_F_0_36_C_A	28912493	28934587	33.3361	26.1102	PF00097,PF00271,PF00176	PTHR10799,PTHR10799:SF705	0	3.6.4.12	0	GO:0046872,GO:0005524	AT1G61140.3	EDA16	SNF2 domain-containing protein / helicase domain-containing protein / zinc finger protein-related
SW_Drought_Gene_2014	Phvul.006G189300	6	28957013	28962611	2	3378581_F_0_36_C_A	S06_28934587	1.42065e-05	0.144381	0.00444538	3.22e-05	3378581_F_0_36_C_A	28912493	28934587	33.3361	26.1102	PF08513,PF10607	PTHR12864	KOG2659	0	0	GO:0005515	AT1G61150.1	0	LisH and RanBPM domains containing protein
SW_Drought_Gene_2014	Phvul.007G017200	7	1164241	1165908	2	S07_1139472	8210783	3.24655e-06	0.0329947	0.00253805	2.36e-07	S07_1139472	1139472	1177914	40.6113	19.1408	PF01535	PTHR24015,PTHR24015:SF537	0	0	0	0	AT2G17033.2	0	pentatricopeptide (PPR) repeat-containing protein
SW_Drought_Gene_2014	Phvul.007G017300	7	1167539	1173449	2	S07_1139472	8210783	3.24655e-06	0.0329947	0.00253805	2.36e-07	S07_1139472	1139472	1177914	40.6113	19.1408	PF00400	PTHR15574,PTHR15574:SF32	0	0	K11804	GO:0005515	AT4G35140.1	0	Transducin/WD40 repeat-like superfamily protein
SW_Drought_Gene_2014	Phvul.007G020800	7	1457209	1459064	4	8178895	3384387_F_0_10_A_G	2.83956e-06	0.0288584	0.00253805	1.43e-11	3384387_F_0_36_T_G	1476630	1507130	58.8023	15.3205	PF00201	PTHR11926,PTHR11926:SF384	KOG1192	2.4.1.272	0	GO:0016758,GO:0008152	AT4G34131.1	UGT73B3	UDP-glucosyl transferase 73B3
SW_Drought_Gene_2014	Phvul.007G020900	7	1470632	1478494	4	8178895	3384387_F_0_10_A_G	2.83956e-06	0.0288584	0.00253805	1.43e-11	3384387_F_0_36_T_G	1476630	1507130	58.8023	15.3205	PF12171	PTHR10593,PTHR10593:SF50	0	0	0	0	AT2G02080.1	AtIDD4,IDD4	indeterminate(ID)-domain 4
SW_Drought_Gene_2014	Phvul.007G021000	7	1483570	1488983	4	8178895	3384387_F_0_10_A_G	2.83956e-06	0.0288584	0.00253805	1.43e-11	3384387_F_0_36_T_G	1476630	1507130	58.8023	15.3205	PF10584,PF00227	PTHR11599,PTHR11599:SF14	KOG0176	3.4.25.1	K02729	GO:0019773,GO:0006511,GO:0004175,GO:0051603,GO:0005839,GO:0004298	AT3G14290.1	PAE2	20S proteasome alpha subunit E2
SW_Drought_Gene_2014	Phvul.007G021100	7	1491033	1495934	4	8178895	3384387_F_0_10_A_G	2.83956e-06	0.0288584	0.00253805	1.43e-11	3384387_F_0_36_T_G	1476630	1507130	58.8023	15.3205	PF01535,PF13041	PTHR24015,PTHR24015:SF421	0	0	0	0	AT2G35130.1	0	Tetratricopeptide repeat (TPR)-like superfamily protein
SW_Drought_Gene_2014	Phvul.007G021200	7	1499479	1505460	4	8178895	3384387_F_0_10_A_G	2.83956e-06	0.0288584	0.00253805	1.43e-11	3384387_F_0_36_T_G	1476630	1507130	58.8023	15.3205	PF00288	PTHR10977,PTHR10977:SF3	0	4.1.1.33	K01597	GO:0005524,GO:0016831,GO:0008299	AT3G54250.1	0	GHMP kinase family protein
SW_Drought_Gene_2014	Phvul.007G021300	7	1506838	1508980	4	8178895	3384387_F_0_10_A_G	2.83956e-06	0.0288584	0.00253805	1.43e-11	3384387_F_0_36_T_G	1476630	1507130	58.8023	15.3205	PF14416,PF13839	PTHR32285,PTHR32285:SF52	0	0	0	0	AT3G54260.1	TBL36	TRICHOME BIREFRINGENCE-LIKE 36
SW_Drought_Gene_2014	Phvul.007G021400	7	1510208	1510784	4	8178895	3384387_F_0_10_A_G	2.83956e-06	0.0288584	0.00253805	1.43e-11	3384387_F_0_36_T_G	1476630	1507130	58.8023	15.3205	PF00190	PTHR31238,PTHR31238:SF8	0	0	0	GO:0045735	AT3G10080.1	0	RmlC-like cupins superfamily protein
SW_Drought_Gene_2014	Phvul.011G209100	11	52814777	52824388	3	3383169_F_0_51_A_G	8199379_F_0_62_T_G	1.53093e-05	0.155588	0.00444538	1.56e-07	3383169_F_0_51_A_G	52773784	52829975	30.4828	8.32825	0	PTHR33334,PTHR33334:SF1	0	0	0	0	AT3G54500.1	0	0
SW_Drought_Gene_2014	Phvul.011G209200	11	52803665	52806589	3	3383169_F_0_51_A_G	8199379_F_0_62_T_G	1.53093e-05	0.155588	0.00444538	1.56e-07	3383169_F_0_51_A_G	52773784	52829975	30.4828	8.32825	PF00191	PTHR10502,PTHR10502:SF113	KOG0819	0	K17099	GO:0005544,GO:0005509	AT5G12380.1	ANNAT8	annexin 8
SW_Drought_Gene_2014	Phvul.011G209300	11	52795513	52798483	3	3383169_F_0_51_A_G	8199379_F_0_62_T_G	1.53093e-05	0.155588	0.00444538	1.56e-07	3383169_F_0_51_A_G	52773784	52829975	30.4828	8.32825	PF00191	PTHR10502,PTHR10502:SF113	KOG0819	0	0	GO:0005544,GO:0005509	AT5G12380.1	ANNAT8	annexin 8
SW_Drought_Gene_2014	Phvul.011G209400	11	52788550	52791464	3	3383169_F_0_51_A_G	8199379_F_0_62_T_G	1.53093e-05	0.155588	0.00444538	1.56e-07	3383169_F_0_51_A_G	52773784	52829975	30.4828	8.32825	PF00191	PTHR10502,PTHR10502:SF104	KOG0819	0	K17099	GO:0005544,GO:0005509	AT2G38750.1	ANNAT4	annexin 4
SW_Drought_Gene_2014	Phvul.011G209500	11	52778448	52782342	3	3383169_F_0_51_A_G	8199379_F_0_62_T_G	1.53093e-05	0.155588	0.00444538	1.56e-07	3383169_F_0_51_A_G	52773784	52829975	30.4828	8.32825	PF00191	PTHR10502,PTHR10502:SF99	KOG0819	0	0	GO:0005544,GO:0005509	AT2G38760.1	ANN3,ANNAT3	annexin 3
SW_Drought_Gene_2014	Phvul.011G209600	11	52770861	52773922	2	3383169_F_0_51_A_G	3367385_F_0_59_C_T	2.82582e-06	0.0287188	0.00253805	1.56e-07	3383169_F_0_51_A_G	52773784	52815574	28.2601	8.0814	0	PTHR22979	0	0	0	0	0	0	0
SW_Drought_Gene_2014	Phvul.011G209700	11	52766583	52767630	2	3383169_F_0_51_A_G	3367385_F_0_59_C_T	2.82582e-06	0.0287188	0.00253805	1.56e-07	3383169_F_0_51_A_G	52773784	52815574	28.2601	8.0814	0	0	0	0	0	0	0	0	0
SW_Drought_Gene_2014	Phvul.010G032400	10	4713876	4723130	2	S10_4671175	3378312_F_0_26_T_G	4.16756e-07	0.00423549	0.00253805	4.68e-11	3378312_F_0_26_T_G	4671175	4753221	43.6289	5.00467	0	PTHR32387,PTHR32387:SF3	0	0	K17592	0	AT3G48770.1	0	DNA binding;ATP binding
SW_Drought_Gene_2014	Phvul.010G032800	10	4770940	4771323	4	3378312_F_0_26_T_G	3374861	1.12908e-05	0.114748	0.00444538	4.68e-11	3378312_F_0_26_T_G	4753221	4816881	43.826	4.06935	0	PTHR34964,PTHR34964:SF1	0	0	0	0	AT5G17590.1	0	Putative membrane lipoprotein
SW_Drought_Gene_2014	Phvul.010G032700	10	4751610	4764524	2	3378312_F_0_26_T_G	3378161_F_0_28_G_T	7.6972e-07	0.00782266	0.00253805	4.68e-11	3378312_F_0_26_T_G	4753221	4813079	43.6111	2.66456	PF00626,PF04810,PF04815,PF08033,PF04811	PTHR11141,PTHR11141:SF2	0	0	K14006	GO:0030127,GO:0008270,GO:0006888,GO:0006886	AT2G21630.1	0	Sec23/Sec24 protein transport family protein
SW_Drought_Gene_2014	Phvul.007G022100	7	1548246	1549163	3	3384387_F_0_36_T_G	3373888	1.25779e-05	0.127829	0.00444538	1.43e-11	3384387_F_0_36_T_G	1507104	1561421	48.5796	2.38037	PF04819	PTHR16007,PTHR16007:SF29	0	0	0	0	AT1G55230.1	0	Family of unknown function (DUF716)
SW_Drought_Gene_2014	Phvul.007G022200	7	1553768	1567166	3	3384387_F_0_36_T_G	3373888	1.25779e-05	0.127829	0.00444538	1.43e-11	3384387_F_0_36_T_G	1507104	1561421	48.5796	2.38037	PF12612	PTHR12658,PTHR12658:SF0	0	0	0	0	AT3G60740.1	CHO,EMB133,TFC D,TTN1	ARM repeat superfamily protein
SW_Drought_Gene_JOINT	Phvul.007G020800	7	1457209	1459064	4	8178895	3384387_F_0_10_A_G	3.03349e-05	0.308294	0.0280267	1.53e-11	3384387_F_0_36_T_G	1476630	1507130	47.0797	15.3205	PF00201	PTHR11926,PTHR11926:SF384	KOG1192	2.4.1.272	0	GO:0016758,GO:0008152	AT4G34131.1	UGT73B3	UDP-glucosyl transferase 73B3
SW_Drought_Gene_JOINT	Phvul.007G020900	7	1470632	1478494	4	8178895	3384387_F_0_10_A_G	3.03349e-05	0.308294	0.0280267	1.53e-11	3384387_F_0_36_T_G	1476630	1507130	47.0797	15.3205	PF12171	PTHR10593,PTHR10593:SF50	0	0	0	0	AT2G02080.1	AtIDD4,IDD4	indeterminate(ID)-domain 4
SW_Drought_Gene_JOINT	Phvul.007G021000	7	1483570	1488983	4	8178895	3384387_F_0_10_A_G	3.03349e-05	0.308294	0.0280267	1.53e-11	3384387_F_0_36_T_G	1476630	1507130	47.0797	15.3205	PF10584,PF00227	PTHR11599,PTHR11599:SF14	KOG0176	3.4.25.1	K02729	GO:0019773,GO:0006511,GO:0004175,GO:0051603,GO:0005839,GO:0004298	AT3G14290.1	PAE2	20S proteasome alpha subunit E2
SW_Drought_Gene_JOINT	Phvul.007G021100	7	1491033	1495934	4	8178895	3384387_F_0_10_A_G	3.03349e-05	0.308294	0.0280267	1.53e-11	3384387_F_0_36_T_G	1476630	1507130	47.0797	15.3205	PF01535,PF13041	PTHR24015,PTHR24015:SF421	0	0	0	0	AT2G35130.1	0	Tetratricopeptide repeat (TPR)-like superfamily protein
SW_Drought_Gene_JOINT	Phvul.007G021200	7	1499479	1505460	4	8178895	3384387_F_0_10_A_G	3.03349e-05	0.308294	0.0280267	1.53e-11	3384387_F_0_36_T_G	1476630	1507130	47.0797	15.3205	PF00288	PTHR10977,PTHR10977:SF3	0	4.1.1.33	K01597	GO:0005524,GO:0016831,GO:0008299	AT3G54250.1	0	GHMP kinase family protein
SW_Drought_Gene_JOINT	Phvul.007G021300	7	1506838	1508980	4	8178895	3384387_F_0_10_A_G	3.03349e-05	0.308294	0.0280267	1.53e-11	3384387_F_0_36_T_G	1476630	1507130	47.0797	15.3205	PF14416,PF13839	PTHR32285,PTHR32285:SF52	0	0	0	0	AT3G54260.1	TBL36	TRICHOME BIREFRINGENCE-LIKE 36
SW_Drought_Gene_JOINT	Phvul.007G021400	7	1510208	1510784	4	8178895	3384387_F_0_10_A_G	3.03349e-05	0.308294	0.0280267	1.53e-11	3384387_F_0_36_T_G	1476630	1507130	47.0797	15.3205	PF00190	PTHR31238,PTHR31238:SF8	0	0	0	GO:0045735	AT3G10080.1	0	RmlC-like cupins superfamily protein
SW_Drought_Gene_JOINT	Phvul.011G209100	11	52814777	52824388	3	3383169_F_0_51_A_G	8199379_F_0_62_T_G	5.63864e-05	0.573055	0.0337091	4.93e-07	3383169_F_0_51_A_G	52773784	52829975	26.7709	8.32825	0	PTHR33334,PTHR33334:SF1	0	0	0	0	AT3G54500.1	0	0
SW_Drought_Gene_JOINT	Phvul.011G209200	11	52803665	52806589	3	3383169_F_0_51_A_G	8199379_F_0_62_T_G	5.63864e-05	0.573055	0.0337091	4.93e-07	3383169_F_0_51_A_G	52773784	52829975	26.7709	8.32825	PF00191	PTHR10502,PTHR10502:SF113	KOG0819	0	K17099	GO:0005544,GO:0005509	AT5G12380.1	ANNAT8	annexin 8
SW_Drought_Gene_JOINT	Phvul.011G209600	11	52770861	52773922	2	3383169_F_0_51_A_G	3367385_F_0_59_C_T	9.00369e-06	0.0915045	0.0280267	4.93e-07	3383169_F_0_51_A_G	52773784	52815574	25.5438	8.0814	0	PTHR22979	0	0	0	0	0	0	0
SW_Drought_Gene_JOINT	Phvul.010G032400	10	4713876	4723130	2	S10_4671175	3378312_F_0_26_T_G	4.16773e-05	0.423566	0.0337091	8.29e-08	3378312_F_0_26_T_G	4671175	4753221	28.7823	5.00467	0	PTHR32387,PTHR32387:SF3	0	0	K17592	0	AT3G48770.1	0	DNA binding;ATP binding
SW_Drought_Gene_JOINT	Phvul.007G022100	7	1548246	1549163	3	3384387_F_0_36_T_G	3373888	2.31171e-05	0.234939	0.0280267	1.53e-11	3384387_F_0_36_T_G	1507104	1561421	45.6715	2.38037	PF04819	PTHR16007,PTHR16007:SF29	0	0	0	0	AT1G55230.1	0	Family of unknown function (DUF716)
Trait	Gene	CHR	Gene_Start	Gene_End	No.SNPs	SNP_start	SNP_end	Gene_p-value	Gene_BONF	Gene_FDR_BH	TopSNP.Pvalue	TopSNP_ID	TopSNP_Start	TopSNP_End	Chisq(Obs)	Marker R2 (%)1	Pfam	Panther	KOG	ec	KO	GO	Best-hit-arabi-name	arabi-symbol	arabi-defline
SW_irrigated_Gene_2014	Phvul.010G130500	10	41170017	41171295	2	3369362	3382850_F_0_52_A_G	1.46584e-05	0.148973	0.00396532	4.06e-05	3382850_F_0_52_A_G	41125300	41198999	27.7463	26.7611	PF00249	PTHR10641,PTHR10641:SF535	KOG0048	0	K09422	0	AT2G16720.1	ATMYB7,ATY49,MYB7	myb domain protein 7
SW_irrigated_Gene_2014	Phvul.010G130900	10	41231316	41233104	3	3382850_F_0_52_A_G	3377812_F_0_9_T_A	2.12406e-05	0.215868	0.00399244	8.43e-06	3377812_F_0_9_T_A	41198999	41275947	42.8987	25.8246	PF07011	PTHR33469,PTHR33469:SF3	0	0	0	0	AT1G17455.2	ELF4-L4	ELF4-like 4
SW_irrigated_Gene_2014	Phvul.010G132800	10	41489936	41494654	2	3377213_F_0_23_T_C	3383204_F_0_38_C_G	4.2727e-05	0.434235	0.00493448	2.23e-05	3377213_F_0_23_T_C	41476459	41543312	27.2092	19.2492	PF13713,PF08381	PTHR22870,PTHR22870:SF166	0	0	0	0	AT3G14000.1	ATBRXL2,BRX-LIKE2	DZC (Disease resistance/zinc finger/chromosome condensation-like region) domain containing protein
SW_irrigated_Gene_2014	Phvul.011G174800	11	48512461	48522793	4	18323366	3377127_F_0_33_C_T	2.11068e-05	0.214508	0.00399244	1.31e-06	3377127_F_0_33_C_T	48464157	48565137	33.6178	18.3012	PF01926,PF06071	PTHR23305,PTHR23305:SF12	KOG1491	0	K06942	GO:0005525	AT1G56050.1	0	GTP-binding protein-related
SW_irrigated_Gene_2014	Phvul.010G129900	10	41092877	41093948	4	8179056	3369362	6.85712e-06	0.0696889	0.00302995	3.88e-05	8179056	41045490	41125300	43.2215	17.7209	PF00190	PTHR31238,PTHR31238:SF21	0	0	0	GO:0045735	AT1G72610.1	ATGER1,GER1,GLP1	germin-like protein 1
SW_irrigated_Gene_2014	Phvul.010G129100	10	41044151	41048370	4	3381685_F_0_31_G_A	S10_41082496	3.18378e-05	0.323568	0.00489082	3.88e-05	8179056	41040537	41082496	38.7196	17.6804	PF01966,PF04607	PTHR21262,PTHR21262:SF14	0	2.7.6.5	0	GO:0015969	AT1G54130.1	AT-RSH3,ATRSH3,RSH3	RELA/SPOT homolog 3
SW_irrigated_Gene_2014	Phvul.010G129300	10	41053614	41058544	4	3381685_F_0_31_G_A	S10_41082496	3.18378e-05	0.323568	0.00489082	3.88e-05	8179056	41040537	41082496	38.7196	17.6804	PF13920,PF12483	PTHR12183	KOG1571	6.3.2.19	K15688	GO:0007005,GO:0004842	AT1G54150.1	0	E3 Ubiquitin ligase family protein
SW_irrigated_Gene_2014	Phvul.010G129500	10	41063918	41067644	4	3381685_F_0_31_G_A	S10_41082496	3.18378e-05	0.323568	0.00489082	3.88e-05	8179056	41040537	41082496	38.7196	17.6804	PF06747	PTHR21622	0	0	K17782	0	AT5G23395.1	MIA40	Cox19-like CHCH family protein
SW_irrigated_Gene_2014	Phvul.010G130100	10	41118091	41119832	2	S10_41082496	3369362	1.8352e-05	0.186511	0.00396532	0.000102	S10_41082496	41082496	41125300	26.0025	16.2235	0	PTHR36721	0	0	0	0	AT1G72600.1	0	hydroxyproline-rich glycoprotein family protein
SW_irrigated_Gene_2014	Phvul.004G022700	4	2604487	2605783	4	S04_2567035	3368756_F_0_11_A_C	4.17182e-05	0.423982	0.00493002	3.19e-05	S04_2567035	2567035	2616823	36.478	15.8049	PF01501	PTHR13778,PTHR13778:SF7	0	2.4.1.43	0	GO:0016757	AT3G28340.1	GATL10	galacturonosyltransferase-like 10
SW_irrigated_Gene_2014	Phvul.004G022900	4	2616375	2627929	4	S04_2567035	3368756_F_0_11_A_C	4.17182e-05	0.423982	0.00493002	3.19e-05	S04_2567035	2567035	2616823	36.478	15.8049	PF08295,PF02671,PF16879	PTHR12346,PTHR12346:SF8	KOG4204	0	K11644	GO:0006355	AT5G15020.2	SNL2	SIN3-like 2
SW_irrigated_Gene_2014	Phvul.007G020800	7	1457209	1459064	4	8178895	3384387_F_0_10_A_G	1.68161e-05	0.170902	0.00396532	9.21e-12	3384387_F_0_36_T_G	1476630	1507130	49.9893	15.3205	PF00201	PTHR11926,PTHR11926:SF384	KOG1192	2.4.1.272	0	GO:0016758,GO:0008152	AT4G34131.1	UGT73B3	UDP-glucosyl transferase 73B3
SW_irrigated_Gene_2014	Phvul.007G020900	7	1470632	1478494	4	8178895	3384387_F_0_10_A_G	1.68161e-05	0.170902	0.00396532	9.21e-12	3384387_F_0_36_T_G	1476630	1507130	49.9893	15.3205	PF12171	PTHR10593,PTHR10593:SF50	0	0	0	0	AT2G02080.1	AtIDD4,IDD4	indeterminate(ID)-domain 4
SW_irrigated_Gene_2014	Phvul.007G021000	7	1483570	1488983	4	8178895	3384387_F_0_10_A_G	1.68161e-05	0.170902	0.00396532	9.21e-12	3384387_F_0_36_T_G	1476630	1507130	49.9893	15.3205	PF10584,PF00227	PTHR11599,PTHR11599:SF14	KOG0176	3.4.25.1	K02729	GO:0019773,GO:0006511,GO:0004175,GO:0051603,GO:0005839,GO:0004298	AT3G14290.1	PAE2	20S proteasome alpha subunit E2
SW_irrigated_Gene_2014	Phvul.007G021100	7	1491033	1495934	4	8178895	3384387_F_0_10_A_G	1.68161e-05	0.170902	0.00396532	9.21e-12	3384387_F_0_36_T_G	1476630	1507130	49.9893	15.3205	PF01535,PF13041	PTHR24015,PTHR24015:SF421	0	0	0	0	AT2G35130.1	0	Tetratricopeptide repeat (TPR)-like superfamily protein
SW_irrigated_Gene_2014	Phvul.007G021200	7	1499479	1505460	4	8178895	3384387_F_0_10_A_G	1.68161e-05	0.170902	0.00396532	9.21e-12	3384387_F_0_36_T_G	1476630	1507130	49.9893	15.3205	PF00288	PTHR10977,PTHR10977:SF3	0	4.1.1.33	K01597	GO:0005524,GO:0016831,GO:0008299	AT3G54250.1	0	GHMP kinase family protein
SW_irrigated_Gene_2014	Phvul.007G021300	7	1506838	1508980	4	8178895	3384387_F_0_10_A_G	1.68161e-05	0.170902	0.00396532	9.21e-12	3384387_F_0_36_T_G	1476630	1507130	49.9893	15.3205	PF14416,PF13839	PTHR32285,PTHR32285:SF52	0	0	0	0	AT3G54260.1	TBL36	TRICHOME BIREFRINGENCE-LIKE 36
SW_irrigated_Gene_2014	Phvul.007G021400	7	1510208	1510784	4	8178895	3384387_F_0_10_A_G	1.68161e-05	0.170902	0.00396532	9.21e-12	3384387_F_0_36_T_G	1476630	1507130	49.9893	15.3205	PF00190	PTHR31238,PTHR31238:SF8	0	0	0	GO:0045735	AT3G10080.1	0	RmlC-like cupins superfamily protein
SW_irrigated_Gene_2014	Phvul.006G122300	6	23089131	23093825	5	13121316_F_0_28_G_A	3371441_F_0_46_C_T	3.78833e-05	0.385008	0.00489082	0.000103	3381348_F_0_51_T_C	23053028	23141081	43.6379	12.2116	PF06026	PTHR11934,PTHR11934:SF8	KOG3075	5.3.1.6	K01807	GO:0009052,GO:0004751	AT5G44520.1	0	NagB/RpiA/CoA transferase-like superfamily protein
SW_irrigated_Gene_2014	Phvul.006G122400	6	23098424	23099345	5	13121316_F_0_28_G_A	3371441_F_0_46_C_T	3.78833e-05	0.385008	0.00489082	0.000103	3381348_F_0_51_T_C	23053028	23141081	43.6379	12.2116	0	0	0	0	0	0	0	0	0
SW_irrigated_Gene_2014	Phvul.006G122500	6	23104326	23107748	4	3379201_F_0_42_T_C	3371441_F_0_46_C_T	1.94731e-05	0.197905	0.00396532	0.000103	3381348_F_0_51_T_C	23072874	23141081	43.4853	12.1046	PF04733	PTHR10805,PTHR10805:SF1	KOG3081	0	K17268	GO:0006890,GO:0005198	AT1G30630.1	0	Coatomer epsilon subunit
SW_irrigated_Gene_2014	Phvul.006G122600	6	23109370	23117337	4	3379201_F_0_42_T_C	3371441_F_0_46_C_T	1.94731e-05	0.197905	0.00396532	0.000103	3381348_F_0_51_T_C	23072874	23141081	43.4853	12.1046	PF02719	PTHR10366,PTHR10366:SF326	0	5.1.3.5	K12448	0	AT1G30620.1	HSR8,MUR4,UXE1	NAD(P)-binding Rossmann-fold superfamily protein
SW_irrigated_Gene_2014	Phvul.011G080200	11	7411249	7418979	3	8670140_F_0_5_C_T	3376925	1.30507e-06	0.0132634	0.000698075	9.39e-12	3382279_F_0_6_C_T	7363465	7443610	47.0734	11.8304	PF00320	PTHR10071,PTHR10071:SF184	0	0	0	GO:0043565,GO:0008270,GO:0006355,GO:0003700	AT1G08000.2	GATA10	GATA transcription factor 10
SW_irrigated_Gene_2014	Phvul.006G121700	6	23058315	23066160	4	13121316_F_0_28_G_A	3381118_F_0_48_G_C	1.54291e-05	0.156806	0.00396532	0.000103	3381348_F_0_51_T_C	23053028	23116097	41.6492	10.5609	PF00397,PF04851,PF00271	PTHR24031,PTHR24031:SF255	0	3.6.4.13	K12823	GO:0005515,GO:0016787,GO:0005524,GO:0003677	AT3G06480.1	0	DEAD box RNA helicase family protein
SW_irrigated_Gene_2014	Phvul.006G121900	6	23075462	23076037	4	13121316_F_0_28_G_A	3381118_F_0_48_G_C	1.54291e-05	0.156806	0.00396532	0.000103	3381348_F_0_51_T_C	23053028	23116097	41.6492	10.5609	0	0	0	0	0	0	AT5G23240.1	0	DNAJ heat shock N-terminal domain-containing protein
SW_irrigated_Gene_2014	Phvul.006G122100	6	23081475	23084020	4	13121316_F_0_28_G_A	3381118_F_0_48_G_C	1.54291e-05	0.156806	0.00396532	0.000103	3381348_F_0_51_T_C	23053028	23116097	41.6492	10.5609	PF00153	PTHR24089,PTHR24089:SF296	KOG0765	0	K15121	0	AT5G15640.1	0	Mitochondrial substrate carrier family protein
SW_irrigated_Gene_2014	Phvul.011G080000	11	7357443	7368940	2	8670140_F_0_5_C_T	3382279_F_0_6_C_T	6.59284e-07	0.0067003	0.000441955	9.39e-12	3382279_F_0_6_C_T	7363465	7411543	46.7166	10.0669	PF04499	PTHR12634,PTHR12634:SF8	0	0	K15501	0	AT1G07990.1	0	SIT4 phosphatase-associated family protein
SW_irrigated_Gene_2014	Phvul.011G080100	11	7378711	7382375	2	8670140_F_0_5_C_T	3382279_F_0_6_C_T	6.59284e-07	0.0067003	0.000441955	9.39e-12	3382279_F_0_6_C_T	7363465	7411543	46.7166	10.0669	PF02362,PF06507	PTHR31384,PTHR31384:SF27	0	0	0	GO:0003677,GO:0009725,GO:0006355,GO:0005634	AT2G28350.1	ARF10	auxin response factor 10
SW_irrigated_Gene_2014	Phvul.011G080300	11	7419997	7424662	2	3382279_F_0_6_C_T	3376925	4.9015e-10	4.98139e-06	1.24535e-06	9.39e-12	3382279_F_0_6_C_T	7411543	7443610	46.8086	9.64386	0	PTHR12812,PTHR12812:SF0	0	2.8.2.20	0	GO:0016021,GO:0008146	AT1G08030.1	TPST	tyrosylprotein sulfotransferase
SW_irrigated_Gene_2014	Phvul.011G080400	11	7433489	7442377	2	3382279_F_0_6_C_T	3376925	4.9015e-10	4.98139e-06	1.24535e-06	9.39e-12	3382279_F_0_6_C_T	7411543	7443610	46.8086	9.64386	PF04227	PTHR10584,PTHR10584:SF201	0	0	K16329	GO:0016798	AT1G50510.1	0	indigoidine synthase A family protein
SW_irrigated_Gene_2014	Phvul.011G080500	11	7445062	7449195	2	3382279_F_0_6_C_T	3376925	4.9015e-10	4.98139e-06	1.24535e-06	9.39e-12	3382279_F_0_6_C_T	7411543	7443610	46.8086	9.64386	0	PTHR33604,PTHR33604:SF2	0	0	0	0	AT5G60700.1	0	glycosyltransferase family protein 2
SW_irrigated_Gene_2014	Phvul.011G080600	11	7454110	7458633	2	3382279_F_0_6_C_T	3376925	4.9015e-10	4.98139e-06	1.24535e-06	9.39e-12	3382279_F_0_6_C_T	7411543	7443610	46.8086	9.64386	PF03641	PTHR31223,PTHR31223:SF17	0	0	K06966	0	AT2G28305.1	ATLOG1,LOG1	Putative lysine decarboxylase family protein
SW_irrigated_Gene_2014	Phvul.008G033600	8	2728015	2737706	5	S08_2679710	3379192_F_0_18_G_C	3.98162e-05	0.404652	0.00489082	7.62e-12	16648814_F_0_18_C_T	2679710	2780020	57.7411	8.95549	0	PTHR15744,PTHR15744:SF0	KOG1960	0	0	GO:0005634	AT3G29390.1	RIK	RS2-interacting KH protein
SW_irrigated_Gene_2014	Phvul.011G209100	11	52814777	52824388	3	3383169_F_0_51_A_G	8199379_F_0_62_T_G	1.95086e-05	0.198266	0.00396532	2.84e-06	3383169_F_0_51_A_G	52773784	52829975	29.791	8.32825	0	PTHR33334,PTHR33334:SF1	0	0	0	0	AT3G54500.1	0	0
SW_irrigated_Gene_2014	Phvul.011G209200	11	52803665	52806589	3	3383169_F_0_51_A_G	8199379_F_0_62_T_G	1.95086e-05	0.198266	0.00396532	2.84e-06	3383169_F_0_51_A_G	52773784	52829975	29.791	8.32825	PF00191	PTHR10502,PTHR10502:SF113	KOG0819	0	K17099	GO:0005544,GO:0005509	AT5G12380.1	ANNAT8	annexin 8
SW_irrigated_Gene_2014	Phvul.011G209300	11	52795513	52798483	3	3383169_F_0_51_A_G	8199379_F_0_62_T_G	1.95086e-05	0.198266	0.00396532	2.84e-06	3383169_F_0_51_A_G	52773784	52829975	29.791	8.32825	PF00191	PTHR10502,PTHR10502:SF113	KOG0819	0	0	GO:0005544,GO:0005509	AT5G12380.1	ANNAT8	annexin 8
SW_irrigated_Gene_2014	Phvul.011G209500	11	52778448	52782342	3	3383169_F_0_51_A_G	8199379_F_0_62_T_G	1.95086e-05	0.198266	0.00396532	2.84e-06	3383169_F_0_51_A_G	52773784	52829975	29.791	8.32825	PF00191	PTHR10502,PTHR10502:SF99	KOG0819	0	0	GO:0005544,GO:0005509	AT2G38760.1	ANN3,ANNAT3	annexin 3
SW_irrigated_Gene_2014	Phvul.011G209600	11	52770861	52773922	2	3383169_F_0_51_A_G	3367385_F_0_59_C_T	2.35431e-05	0.239269	0.00412532	2.84e-06	3383169_F_0_51_A_G	52773784	52815574	23.2997	8.0814	0	PTHR22979	0	0	0	0	0	0	0
SW_irrigated_Gene_2014	Phvul.004G151700	4	45444481	45449220	4	3383259_F_0_62_G_A	3378875_F_0_56_A_C	3.96058e-05	0.402514	0.00489082	5.09e-08	3383126_F_0_32_A_G	45422981	45474393	36.2414	5.41509	PF00867,PF00752	PTHR11081,PTHR11081:SF27	KOG2518	3.1.11.1	K10746	GO:0004518,GO:0006281	AT1G18090.1	0	5\'-3\' exonuclease family protein
SW_irrigated_Gene_2014	Phvul.004G151800	4	45449566	45453722	4	3383259_F_0_62_G_A	3378875_F_0_56_A_C	3.96058e-05	0.402514	0.00489082	5.09e-08	3383126_F_0_32_A_G	45422981	45474393	36.2414	5.41509	PF00232	PTHR10353,PTHR10353:SF28	0	3.2.1.21	K05350	GO:0005975,GO:0004553	AT3G18080.1	BGLU44	B-S glucosidase 44
SW_irrigated_Gene_2014	Phvul.004G151900	4	45462680	45465640	4	3383259_F_0_62_G_A	3378875_F_0_56_A_C	3.96058e-05	0.402514	0.00489082	5.09e-08	3383126_F_0_32_A_G	45422981	45474393	36.2414	5.41509	0	PTHR34056,PTHR34056:SF1	0	0	0	0	AT3G18050.1	0	0
SW_irrigated_Gene_2014	Phvul.004G152000	4	45472015	45476790	4	3383259_F_0_62_G_A	3378875_F_0_56_A_C	3.96058e-05	0.402514	0.00489082	5.09e-08	3383126_F_0_32_A_G	45422981	45474393	36.2414	5.41509	PF07714	PTHR24056,PTHR24056:SF0	0	2.7.11.22,2.7.11.23	K02202	GO:0006468,GO:0004672	AT1G73690.1	AT;CDKD;1,CAK3AT,CDKD1;1	cyclin-dependent kinase D1;1
SW_irrigated_Gene_2014	Phvul.010G032400	10	4713876	4723130	2	S10_4671175	3378312_F_0_26_T_G	1.30181e-07	0.00132303	0.000239403	9.14e-12	3378312_F_0_26_T_G	4671175	4753221	47.4103	5.00467	0	PTHR32387,PTHR32387:SF3	0	0	K17592	0	AT3G48770.1	0	DNA binding;ATP binding
SW_irrigated_Gene_2014	Phvul.008G034033	8	2783141	2783882	4	16648814_F_0_18_C_T	3372452_F_0_11_A_C	1.79513e-07	0.00182439	0.000239403	7.62e-12	16648814_F_0_18_C_T	2735422	2819724	58.5922	4.97954	0	PTHR13890,PTHR13890:SF4	0	0	0	0	AT3G19640.1	MGT4,MRS2-3	magnesium transporter 4
SW_irrigated_Gene_2014	Phvul.008G034066	8	2783968	2785115	4	16648814_F_0_18_C_T	3372452_F_0_11_A_C	1.79513e-07	0.00182439	0.000239403	7.62e-12	16648814_F_0_18_C_T	2735422	2819724	58.5922	4.97954	0	0	0	0	0	0	0	0	0
SW_irrigated_Gene_2014	Phvul.004G168600	4	47222983	47225075	4	3365421	3369047_F_0_14_A_G	2.19991e-05	0.223577	0.00399244	4.79e-12	3369047_F_0_14_A_G	47177982	47226726	50.2386	4.39724	PF09118,PF07250	PTHR32208,PTHR32208:SF29	0	1.1.3.9	0	0	AT1G67290.1	0	glyoxal oxidase-related protein
SW_irrigated_Gene_2014	Phvul.004G168700	4	47226664	47228512	4	3365421	3369047_F_0_14_A_G	2.19991e-05	0.223577	0.00399244	4.79e-12	3369047_F_0_14_A_G	47177982	47226726	50.2386	4.39724	PF06955,PF00722	PTHR31062,PTHR31062:SF55	0	2.4.1.207	K08235	GO:0048046,GO:0016762,GO:0006073,GO:0005618,GO:0005975,GO:0004553	AT4G28850.1	ATXTH26,XTH26	xyloglucan endotransglucosylase/hydrolase 26
SW_irrigated_Gene_2014	Phvul.004G168800	4	47230558	47235746	3	3380517_F_0_49_C_A	3369047_F_0_14_A_G	7.8276e-07	0.00795519	0.000441955	4.79e-12	3369047_F_0_14_A_G	47208098	47226726	47.7758	3.29974	PF00069	PTHR11909,PTHR11909:SF97	KOG1163	2.7.11.1	0	GO:0006468,GO:0005524,GO:0004672	AT4G28880.1	ckl3	casein kinase I-like 3
SW_irrigated_Gene_2014	Phvul.004G168900	4	47236808	47237413	3	3380517_F_0_49_C_A	3369047_F_0_14_A_G	7.8276e-07	0.00795519	0.000441955	4.79e-12	3369047_F_0_14_A_G	47208098	47226726	47.7758	3.29974	0	0	0	0	0	0	0	0	0
SW_irrigated_Gene_2014	Phvul.004G169000	4	47241177	47244740	3	3380517_F_0_49_C_A	3369047_F_0_14_A_G	7.8276e-07	0.00795519	0.000441955	4.79e-12	3369047_F_0_14_A_G	47208098	47226726	47.7758	3.29974	PF00903	PTHR10374,PTHR10374:SF12	KOG2943	4.4.1.5	K01759	0	AT1G67280.1	0	Glyoxalase/Bleomycin resistance protein/Dioxygenase superfamily protein
SW_irrigated_Gene_2014	Phvul.004G169100	4	47247247	47250739	3	3380517_F_0_49_C_A	3369047_F_0_14_A_G	7.8276e-07	0.00795519	0.000441955	4.79e-12	3369047_F_0_14_A_G	47208098	47226726	47.7758	3.29974	PF16135	PTHR31413,PTHR31413:SF2	0	0	0	GO:0007165	AT4G28910.1	NINJA	novel interactor of JAZ
SW_irrigated_Gene_2014	Phvul.004G169200	4	47253324	47254877	3	3380517_F_0_49_C_A	3369047_F_0_14_A_G	7.8276e-07	0.00795519	0.000441955	4.79e-12	3369047_F_0_14_A_G	47208098	47226726	47.7758	3.29974	PF13639	PTHR14155,PTHR14155:SF95	0	0	K10664	GO:0008270,GO:0005515	AT4G28890.1	0	RING/U-box superfamily protein
SW_irrigated_Gene_2014	Phvul.004G169300	4	47257526	47266829	3	3380517_F_0_49_C_A	3369047_F_0_14_A_G	7.8276e-07	0.00795519	0.000441955	4.79e-12	3369047_F_0_14_A_G	47208098	47226726	47.7758	3.29974	PF07714,PF00027,PF00481	PTHR24353,PTHR24353:SF80	KOG0614	2.7.11.12	0	GO:0006468,GO:0004672,GO:0003824	AT2G20050.1	0	protein serine/threonine phosphatases;protein kinases;catalytics;cAMP-dependent protein kinase regulators;ATP binding;protein serine/threonine phosphatases
SW_irrigated_Gene_2014	Phvul.007G076900	7	7321660	7338714	2	3372975	3372975_F_0_66_T_A	3.67021e-05	0.373003	0.00489082	1.17e-07	3372975_F_0_66_T_A	7377532	7377564	31.0104	2.70765	PF00295	PTHR31375,PTHR31375:SF37	0	3.2.1.15	K01213	GO:0005975,GO:0004650	AT3G07840.1	0	Pectin lyase-like superfamily protein
SW_irrigated_Gene_2014	Phvul.007G077000	7	7337018	7338367	2	3372975	3372975_F_0_66_T_A	3.67021e-05	0.373003	0.00489082	1.17e-07	3372975_F_0_66_T_A	7377532	7377564	31.0104	2.70765	PF00295	PTHR31375,PTHR31375:SF37	0	3.2.1.15	K01213	GO:0005975,GO:0004650	AT3G07840.1	0	Pectin lyase-like superfamily protein
SW_irrigated_Gene_2014	Phvul.007G077050	7	7351962	7353706	2	3372975	3372975_F_0_66_T_A	3.67021e-05	0.373003	0.00489082	1.17e-07	3372975_F_0_66_T_A	7377532	7377564	31.0104	2.70765	PF00295	PTHR31375,PTHR31375:SF37	0	3.2.1.15	K01213	GO:0005975,GO:0004650	AT5G48140.1	0	Pectin lyase-like superfamily protein
SW_irrigated_Gene_2014	Phvul.007G077100	7	7371896	7373146	2	3372975	3372975_F_0_66_T_A	3.67021e-05	0.373003	0.00489082	1.17e-07	3372975_F_0_66_T_A	7377532	7377564	31.0104	2.70765	0	PTHR34576,PTHR34576:SF3	0	0	0	0	AT5G52900.1	0	0
SW_irrigated_Gene_2014	Phvul.007G077150	7	7375346	7376401	2	3372975	3372975_F_0_66_T_A	3.67021e-05	0.373003	0.00489082	1.17e-07	3372975_F_0_66_T_A	7377532	7377564	31.0104	2.70765	0	0	0	0	0	0	0	0	0
SW_irrigated_Gene_2014	Phvul.007G077200	7	7376811	7385401	2	3372975	3372975_F_0_66_T_A	3.67021e-05	0.373003	0.00489082	1.17e-07	3372975_F_0_66_T_A	7377532	7377564	31.0104	2.70765	PF02517	PTHR10794,PTHR10794:SF58	0	0	K07052	GO:0016020	AT5G60750.1	0	CAAX amino terminal protease family protein
SW_irrigated_Gene_2014	Phvul.007G077300	7	7391439	7397974	2	3372975	3372975_F_0_66_T_A	3.67021e-05	0.373003	0.00489082	1.17e-07	3372975_F_0_66_T_A	7377532	7377564	31.0104	2.70765	PF00954,PF01453,PF00069	PTHR27002,PTHR27002:SF50	KOG1187	2.7.11.1	0	GO:0048544,GO:0006468,GO:0005524,GO:0004672	AT5G24080.1	0	Protein kinase superfamily protein
SW_irrigated_Gene_2014	Phvul.007G077400	7	7398218	7405333	2	3372975	3372975_F_0_66_T_A	3.67021e-05	0.373003	0.00489082	1.17e-07	3372975_F_0_66_T_A	7377532	7377564	31.0104	2.70765	PF00400	PTHR13083	KOG1333	0	0	GO:0005515	AT3G49660.1	0	Transducin/WD40 repeat-like superfamily protein
SW_irrigated_Gene_2014	Phvul.007G077500	7	7408695	7411352	2	3372975	3372975_F_0_66_T_A	3.67021e-05	0.373003	0.00489082	1.17e-07	3372975_F_0_66_T_A	7377532	7377564	31.0104	2.70765	PF00560,PF08263,PF13855	PTHR27004,PTHR27004:SF34	KOG0472	0	0	GO:0005515	AT2G34930.1	0	disease resistance family protein / LRR family protein
SW_irrigated_Gene_2014	Phvul.007G077600	7	7413328	7422989	2	3372975	3372975_F_0_66_T_A	3.67021e-05	0.373003	0.00489082	1.17e-07	3372975_F_0_66_T_A	7377532	7377564	31.0104	2.70765	PF05029,PF04821	PTHR22940,PTHR22940:SF4	KOG1974	0	K03155	0	AT5G52910.1	ATIM	timeless family protein
SW_irrigated_Gene_2014	Phvul.007G077700	7	7424689	7430582	2	3372975	3372975_F_0_66_T_A	3.67021e-05	0.373003	0.00489082	1.17e-07	3372975_F_0_66_T_A	7377532	7377564	31.0104	2.70765	PF02887,PF00224	PTHR11817,PTHR11817:SF2	0	2.7.1.40	K00873	GO:0030955,GO:0006096,GO:0004743,GO:0000287	AT5G52920.1	PKP-BETA1,PKP1,PKP2	plastidic pyruvate kinase beta subunit 1
SW_irrigated_Gene_2014	Phvul.007G022100	7	1548246	1549163	3	3384387_F_0_36_T_G	3373888	1.43115e-05	0.145448	0.00396532	9.21e-12	3384387_F_0_36_T_G	1507104	1561421	47.962	2.38037	PF04819	PTHR16007,PTHR16007:SF29	0	0	0	0	AT1G55230.1	0	Family of unknown function (DUF716)
SW_irrigated_Gene_2014	Phvul.007G022200	7	1553768	1567166	3	3384387_F_0_36_T_G	3373888	1.43115e-05	0.145448	0.00396532	9.21e-12	3384387_F_0_36_T_G	1507104	1561421	47.962	2.38037	PF12612	PTHR12658,PTHR12658:SF0	0	0	0	0	AT3G60740.1	CHO,EMB133,TFC D,TTN1	ARM repeat superfamily protein
SW_irrigated_Gene_2014	Phvul.008G033900	8	2767224	2769432	4	S08_2729368	S08_2793533	1.91995e-06	0.0195125	0.000929164	7.62e-12	16648814_F_0_18_C_T	2729368	2793533	56.7174	1.8065	0	PTHR13890,PTHR13890:SF4	KOG2662	0	K16075	0	AT3G19640.1	MGT4,MRS2-3	magnesium transporter 4
SW_irrigated_Gene_2014	Phvul.008G033700	8	2741544	2742514	3	S08_2729368	3379192_F_0_18_G_C	1.88451e-07	0.00191523	0.000239403	7.62e-12	16648814_F_0_18_C_T	2729368	2780020	52.9994	1.23831	PF00125	PTHR11426	KOG1745	0	K11253	GO:0003677,GO:0000786	AT1G09200.1	0	Histone superfamily protein
SW_irrigated_Gene_2015	Phvul.007G016700	7	1145801	1146587	3	3380130_F_0_66_G_A	8210783	2.43801e-05	0.247775	0.0105037	7.58e-06	8210783	1110675	1177914	38.764	26.9944	PF01494	PTHR13789,PTHR13789:SF185	0	0	0	GO:0071949	AT5G05320.1	0	FAD/NAD(P)-binding oxidoreductase family protein
SW_irrigated_Gene_2015	Phvul.007G016800	7	1147702	1151254	3	3380130_F_0_66_G_A	8210783	2.43801e-05	0.247775	0.0105037	7.58e-06	8210783	1110675	1177914	38.764	26.9944	0	0	0	2.7.11.1	0	0	AT5G40820.1	ATATR,ATR,ATRAD3	Ataxia telangiectasia-mutated and RAD3-related
SW_irrigated_Gene_2015	Phvul.007G016900	7	1151027	1151257	3	3380130_F_0_66_G_A	8210783	2.43801e-05	0.247775	0.0105037	7.58e-06	8210783	1110675	1177914	38.764	26.9944	0	0	0	2.7.11.1	0	0	AT5G40820.1	ATATR,ATR,ATRAD3	Ataxia telangiectasia-mutated and RAD3-related
SW_irrigated_Gene_2015	Phvul.007G017000	7	1151731	1160689	3	3380130_F_0_66_G_A	8210783	2.43801e-05	0.247775	0.0105037	7.58e-06	8210783	1110675	1177914	38.764	26.9944	PF02260,PF08064,PF00454,PF02259	PTHR11139,PTHR11139:SF69	0	2.7.11.1	K06640	GO:0005515,GO:0004674,GO:0016773	AT5G40820.1	ATATR,ATR,ATRAD3	Ataxia telangiectasia-mutated and RAD3-related
SW_irrigated_Gene_2015	Phvul.007G017100	7	1159699	1162079	3	3380130_F_0_66_G_A	8210783	2.43801e-05	0.247775	0.0105037	7.58e-06	8210783	1110675	1177914	38.764	26.9944	PF01494	PTHR13789,PTHR13789:SF185	KOG2614	0	0	GO:0071949	AT5G05320.1	0	FAD/NAD(P)-binding oxidoreductase family protein
SW_irrigated_Gene_2015	Phvul.007G017400	7	1175261	1177663	3	S07_1139472	3380111_F_0_61_A_C	1.24159e-05	0.126183	0.0105037	7.58e-06	8210783	1139472	1226033	50.5796	23.9229	PF05180	PTHR20922,PTHR20922:SF15	0	0	K17808	GO:0008270	AT5G27280.1	0	Zim17-type zinc finger protein
SW_irrigated_Gene_2015	Phvul.007G017500	7	1178175	1185403	3	S07_1139472	3380111_F_0_61_A_C	1.24159e-05	0.126183	0.0105037	7.58e-06	8210783	1139472	1226033	50.5796	23.9229	PF07690	PTHR23504,PTHR23504:SF36	KOG2816	0	0	GO:0055085,GO:0016021	AT2G16980.2	0	Major facilitator superfamily protein
SW_irrigated_Gene_2015	Phvul.007G017600	7	1192228	1192916	2	8210783	3380111_F_0_61_A_C	2.58382e-05	0.262594	0.0105037	7.58e-06	8210783	1177914	1226033	32.9964	20.5801	0	PTHR33148,PTHR33148:SF4	0	0	0	0	AT3G21680.1	0	0
SW_irrigated_Gene_2015	Phvul.007G017700	7	1194746	1197234	2	8210783	3380111_F_0_61_A_C	2.58382e-05	0.262594	0.0105037	7.58e-06	8210783	1177914	1226033	32.9964	20.5801	PF01603	PTHR10257,PTHR10257:SF28	KOG2085	0	K11584	GO:0008601,GO:0007165,GO:0000159	AT5G25510.1	0	Protein phosphatase 2A regulatory B subunit family protein
SW_irrigated_Gene_2015	Phvul.007G017800	7	1197622	1212008	2	8210783	3380111_F_0_61_A_C	2.58382e-05	0.262594	0.0105037	7.58e-06	8210783	1177914	1226033	32.9964	20.5801	PF03810,PF13513	PTHR10527,PTHR10527:SF3	0	0	K18752	GO:0008536,GO:0006886	AT2G16950.2	ATTRN1,TRN1	transportin 1
SW_irrigated_Gene_2015	Phvul.007G017900	7	1214904	1219214	2	8210783	3380111_F_0_61_A_C	2.58382e-05	0.262594	0.0105037	7.58e-06	8210783	1177914	1226033	32.9964	20.5801	PF14259,PF00226	PTHR24078,PTHR24078:SF264	KOG0691	0	K09537	0	AT5G23590.1	0	DNAJ heat shock N-terminal domain-containing protein
SW_irrigated_Gene_2015	Phvul.007G018000	7	1221065	1228211	2	8210783	3380111_F_0_61_A_C	2.58382e-05	0.262594	0.0105037	7.58e-06	8210783	1177914	1226033	32.9964	20.5801	PF02874,PF00306,PF00006	PTHR15184,PTHR15184:SF53	0	3.6.3.6	K02147	GO:0046034,GO:0015992,GO:0033178,GO:0016820,GO:0015991,GO:0005524	AT4G38510.5	0	ATPase, V1 complex, subunit B protein
SW_irrigated_Gene_2015	Phvul.004G027700	4	3157686	3159839	2	3377326_F_0_33_G_A	S04_3204956	0.000185265	1	0.037657	4.58e-05	S04_3204956	3182966	3204956	21.2767	19.5679	PF00010	PTHR12565,PTHR12565:SF172	0	0	0	GO:0046983	AT3G28857.1	0	basic helix-loop-helix (bHLH) DNA-binding family protein
SW_irrigated_Gene_2015	Phvul.007G017200	7	1164241	1165908	2	S07_1139472	8210783	7.51101e-06	0.0763344	0.0105037	7.58e-06	8210783	1139472	1177914	37.6242	19.1408	PF01535	PTHR24015,PTHR24015:SF537	0	0	0	0	AT2G17033.2	0	pentatricopeptide (PPR) repeat-containing protein
SW_irrigated_Gene_2015	Phvul.007G017300	7	1167539	1173449	2	S07_1139472	8210783	7.51101e-06	0.0763344	0.0105037	7.58e-06	8210783	1139472	1177914	37.6242	19.1408	PF00400	PTHR15574,PTHR15574:SF32	0	0	K11804	GO:0005515	AT4G35140.1	0	Transducin/WD40 repeat-like superfamily protein
SW_irrigated_Gene_2015	Phvul.010G141300	10	42328876	42337441	7	3380595_F_0_62_A_G	8176068	0.000198159	1	0.039488	3.75e-07	3383887_F_0_14_C_T	42287726	42382691	58.0864	17.9995	0	PTHR11871,PTHR11871:SF11	0	0	K04354	GO:0008601,GO:0000159	AT1G17720.1	ATB BETA	Protein phosphatase 2A, regulatory subunit PR55
SW_irrigated_Gene_2015	Phvul.011G174900	11	48531187	48540537	3	8176546	3379830_F_0_14_T_C	0.000132776	1	0.0321286	0.000528	8176546	48555001	48579774	33.5022	17.4287	0	PTHR21551,PTHR21551:SF4	0	0	K12617	0	AT1G79090.2	0	0
SW_irrigated_Gene_2015	Phvul.011G175000	11	48550831	48554242	3	8176546	3379830_F_0_14_T_C	0.000132776	1	0.0321286	0.000528	8176546	48555001	48579774	33.5022	17.4287	PF08276,PF01453,PF07714	PTHR27002,PTHR27002:SF116	KOG1187	2.7.11.1	0	GO:0006468,GO:0004672	AT1G11330.2	0	S-locus lectin protein kinase family protein
SW_irrigated_Gene_2015	Phvul.011G175200	11	48580003	48584193	3	8176546	3379830_F_0_14_T_C	0.000132776	1	0.0321286	0.000528	8176546	48555001	48579774	33.5022	17.4287	PF08276,PF01453,PF07714	PTHR27002,PTHR27002:SF116	KOG1187	2.7.11.1	0	GO:0006468,GO:0004672	AT1G11330.2	0	S-locus lectin protein kinase family protein
SW_irrigated_Gene_2015	Phvul.010G141566	10	42366144	42366812	4	3383887_F_0_14_C_T	3379944_F_0_48_G_A	1.77394e-05	0.180286	0.0105037	3.75e-07	3383887_F_0_14_C_T	42372603	42410990	49.8062	17.0168	0	0	0	0	0	0	0	0	0
SW_irrigated_Gene_2015	Phvul.010G141650	10	42376843	42377454	4	3383887_F_0_14_C_T	3379944_F_0_48_G_A	1.77394e-05	0.180286	0.0105037	3.75e-07	3383887_F_0_14_C_T	42372603	42410990	49.8062	17.0168	0	0	0	0	0	0	AT5G14010.1	KNU	C2H2 and C2HC zinc fingers superfamily protein
SW_irrigated_Gene_2015	Phvul.010G141800	10	42401878	42410642	4	3383887_F_0_14_C_T	3379944_F_0_48_G_A	1.77394e-05	0.180286	0.0105037	3.75e-07	3383887_F_0_14_C_T	42372603	42410990	49.8062	17.0168	PF07303	PTHR38372	KOG4796	0	0	0	AT3G21290.1	0	dentin sialophosphoprotein-related
SW_irrigated_Gene_2015	Phvul.010G141400	10	42354876	42357398	3	3383887_F_0_14_C_T	3370913	1.18951e-05	0.12089	0.0105037	3.75e-07	3383887_F_0_14_C_T	42372603	42387971	49.1773	16.3021	PF02701	PTHR31992,PTHR31992:SF23	0	0	0	GO:0006355,GO:0003677	AT1G51700.1	ADOF1,DOF1	DOF zinc finger protein 1
SW_irrigated_Gene_2015	Phvul.007G021500	7	1510987	1514240	5	8178895	3373888	0.000314517	1	0.0484309	5.93e-11	3384387_F_0_36_T_G	1476630	1561421	45.5448	15.3867	PF13414,PF07719,PF00515,PF04049	PTHR12558,PTHR12558:SF10	0	0	K03355	GO:0005515,GO:0030071,GO:0005680	AT3G48150.1	APC8,CDC23	anaphase-promoting complex subunit 8
SW_irrigated_Gene_2015	Phvul.007G021550	7	1514894	1515228	5	8178895	3373888	0.000314517	1	0.0484309	5.93e-11	3384387_F_0_36_T_G	1476630	1561421	45.5448	15.3867	0	0	0	0	0	0	0	0	0
SW_irrigated_Gene_2015	Phvul.007G021700	7	1518028	1518699	5	8178895	3373888	0.000314517	1	0.0484309	5.93e-11	3384387_F_0_36_T_G	1476630	1561421	45.5448	15.3867	PF07883	PTHR31238,PTHR31238:SF8	0	0	0	0	AT3G10080.1	0	RmlC-like cupins superfamily protein
SW_irrigated_Gene_2015	Phvul.007G021800	7	1519814	1522502	5	8178895	3373888	0.000314517	1	0.0484309	5.93e-11	3384387_F_0_36_T_G	1476630	1561421	45.5448	15.3867	PF16881,PF04055	PTHR10949,PTHR10949:SF12	0	2.8.1.8	K03644	GO:0051536,GO:0003824,GO:0051539,GO:0016992,GO:0009107	AT5G08415.1	0	Radical SAM superfamily protein
SW_irrigated_Gene_2015	Phvul.007G021900	7	1524258	1534562	5	8178895	3373888	0.000314517	1	0.0484309	5.93e-11	3384387_F_0_36_T_G	1476630	1561421	45.5448	15.3867	0	PTHR31115,PTHR31115:SF2	0	0	0	0	AT5G22450.1	0	0
SW_irrigated_Gene_2015	Phvul.003G008900	3	1002405	1008789	7	3378336_F_0_42_A_T	3375785	0.000276087	1	0.0467645	0.000206	3374572	996638	1055352	38.3829	13.8517	PF16058	PTHR32219,PTHR32219:SF6	0	0	0	0	AT1G20970.1	0	0
SW_irrigated_Gene_2015	Phvul.003G009100	3	1025371	1029679	7	3378336_F_0_42_A_T	3375785	0.000276087	1	0.0467645	0.000206	3374572	996638	1055352	38.3829	13.8517	PF00642	PTHR12620,PTHR12620:SF16	KOG2202	0	K12836	GO:0046872,GO:0005634,GO:0003723	AT5G42820.2	ATU2AF35B,U2AF35B	Zinc finger C-x8-C-x5-C-x3-H type family protein
SW_irrigated_Gene_2015	Phvul.003G009300	3	1035108	1036969	7	3378336_F_0_42_A_T	3375785	0.000276087	1	0.0467645	0.000206	3374572	996638	1055352	38.3829	13.8517	PF00067	PTHR24298,PTHR24298:SF164	KOG0156	0	0	GO:0055114,GO:0020037,GO:0016705,GO:0005506	AT2G24180.1	CYP71B6	cytochrome p450 71b6
SW_irrigated_Gene_2015	Phvul.003G008700	3	982425	986014	6	3378804_F_0_9_C_G	3374572	0.000131624	1	0.0321286	0.000206	3374572	946086	1033959	42.2714	13.0533	PF13812,PF14432,PF01535,PF13041	PTHR24015,PTHR24015:SF814	0	0	0	0	AT5G13230.1	0	Tetratricopeptide repeat (TPR)-like superfamily protein
SW_irrigated_Gene_2015	Phvul.003G008800	3	989197	995182	6	3378804_F_0_9_C_G	3374572	0.000131624	1	0.0321286	0.000206	3374572	946086	1033959	42.2714	13.0533	PF03110	PTHR31251,PTHR31251:SF3	0	0	0	GO:0005634,GO:0003677	AT1G20980.1	ATSPL14,FBR6,SPL14,SPL1R2	squamosa promoter binding protein-like 14
SW_irrigated_Gene_2015	Phvul.007G022000	7	1540422	1547554	4	3373005	3373888	0.000221141	1	0.0432203	5.93e-11	3384387_F_0_36_T_G	1494828	1561421	45.5093	2.90385	0	PTHR31096,PTHR31096:SF14	0	0	0	0	AT5G04740.1	0	ACT domain-containing protein
SW_irrigated_Gene_2016	Phvul.009G116800	9	18022714	18024684	3	8668582	8215142	0.000236623	1	0.0222925	7.16e-05	8214871	18058903	18063834	35.1368	27.2486	0	0	0	0	0	0	0	0	0
SW_irrigated_Gene_2016	Phvul.009G116900	9	18025630	18031726	3	8668582	8215142	0.000236623	1	0.0222925	7.16e-05	8214871	18058903	18063834	35.1368	27.2486	PF02272,PF07973,PF01411	PTHR11777,PTHR11777:SF14	0	6.1.1.7	K01872	GO:0003676,GO:0043039,GO:0016876,GO:0005524,GO:0006419,GO:0004813,GO:0000166	AT5G22800.1	EMB1030,EMB263,EMB86	Alanyl-tRNA synthetase, class IIc
SW_irrigated_Gene_2016	Phvul.009G117000	9	18034149	18036525	3	8668582	8215142	0.000236623	1	0.0222925	7.16e-05	8214871	18058903	18063834	35.1368	27.2486	PF06244	PTHR21680,PTHR21680:SF0	KOG3223	0	0	0	AT1G16210.1	0	0
SW_irrigated_Gene_2016	Phvul.009G117100	9	18038144	18045736	3	8668582	8215142	0.000236623	1	0.0222925	7.16e-05	8214871	18058903	18063834	35.1368	27.2486	PF00628	PTHR10615,PTHR10615:SF117	0	0	0	GO:0005515	AT2G19260.1	0	RING/FYVE/PHD zinc finger superfamily protein
SW_irrigated_Gene_2016	Phvul.009G117200	9	18048081	18048305	3	8668582	8215142	0.000236623	1	0.0222925	7.16e-05	8214871	18058903	18063834	35.1368	27.2486	0	0	0	0	0	0	0	0	0
SW_irrigated_Gene_2016	Phvul.009G117301	9	18055340	18060107	3	8668582	8215142	0.000236623	1	0.0222925	7.16e-05	8214871	18058903	18063834	35.1368	27.2486	PF04539,PF04545	PTHR30603	0	0	0	GO:0016987,GO:0006355,GO:0006352,GO:0003700,GO:0003677	AT1G08540.1	ABC1,ATSIG1,ATSIG2,SIG1,SIG2,SIGA,SIGB	RNApolymerase sigma subunit 2
SW_irrigated_Gene_2016	Phvul.009G117400	9	18063404	18064315	3	8668582	8215142	0.000236623	1	0.0222925	7.16e-05	8214871	18058903	18063834	35.1368	27.2486	0	0	0	0	0	0	0	0	0
SW_irrigated_Gene_2016	Phvul.009G117500	9	18066025	18072588	3	8668582	8215142	0.000236623	1	0.0222925	7.16e-05	8214871	18058903	18063834	35.1368	27.2486	PF00385	PTHR22812	0	0	0	0	AT5G17690.1	LHP1,TFL2	like heterochromatin protein (LHP1)
SW_irrigated_Gene_2016	Phvul.009G117550	9	18078948	18079259	3	8668582	8215142	0.000236623	1	0.0222925	7.16e-05	8214871	18058903	18063834	35.1368	27.2486	0	0	0	0	0	0	0	0	0
SW_irrigated_Gene_2016	Phvul.009G117600	9	18082340	18083826	3	8668582	8215142	0.000236623	1	0.0222925	7.16e-05	8214871	18058903	18063834	35.1368	27.2486	PF01171,PF16503	PTHR11807,PTHR11807:SF12	KOG2840	2.8.1.4	K14168	0	AT2G44270.1	ROL5	repressor of lrx1
SW_irrigated_Gene_2016	Phvul.009G117700	9	18084463	18085947	3	8668582	8215142	0.000236623	1	0.0222925	7.16e-05	8214871	18058903	18063834	35.1368	27.2486	PF00297	PTHR11229,PTHR11229:SF5	KOG3141	0	K02906	GO:0006412,GO:0005840,GO:0005622,GO:0003735	AT2G43030.1	0	Ribosomal protein L3 family protein
SW_irrigated_Gene_2016	Phvul.009G117800	9	18093006	18102032	3	8668582	8215142	0.000236623	1	0.0222925	7.16e-05	8214871	18058903	18063834	35.1368	27.2486	PF00318,PF01704	PTHR11952,PTHR11952:SF13	KOG2638	2.7.7.9	K00963	GO:0006412,GO:0005840,GO:0005622,GO:0003735,GO:0070569,GO:0008152	AT3G03250.1	AtUGP1,UGP,UGP1	UDP-GLUCOSE PYROPHOSPHORYLASE 1
SW_irrigated_Gene_2016	Phvul.009G117900	9	18102865	18108436	3	8668582	8215142	0.000236623	1	0.0222925	7.16e-05	8214871	18058903	18063834	35.1368	27.2486	PF03094	PTHR31942,PTHR31942:SF13	0	0	K08472	GO:0016021,GO:0006952	AT4G02600.2	ATMLO1,MLO1	Seven transmembrane MLO family protein
SW_irrigated_Gene_2016	Phvul.007G016500	7	1122192	1134167	3	3380130_F_0_66_G_A	8210783	0.000105428	1	0.0153066	9.05e-06	S07_1139472	1110675	1177914	32.9283	26.9944	PF07714	PTHR23257,PTHR23257:SF347	KOG0192	2.7.12.1	0	GO:0006468,GO:0004672	AT4G38470.1	0	ACT-like protein tyrosine kinase family protein
SW_irrigated_Gene_2016	Phvul.011G134600	11	32552930	32556988	2	8664658_F_0_12_C_T	8664658_F_0_14_T_C	1.24172e-05	0.126196	0.009014	1.09e-07	8664658_F_0_12_C_T	32532591	32532593	32.7263	26.9777	PF14416,PF13839	PTHR32285,PTHR32285:SF71	0	0	0	0	AT2G31110.2	TBL40	Plant protein of unknown function (DUF828)
SW_irrigated_Gene_2016	Phvul.007G016200	7	1088897	1091526	3	8197477_F_0_16_T_C	S07_1139472	0.000921347	1	0.0377567	9.05e-06	S07_1139472	1070129	1139472	24.2603	26.4003	PF13917	0	KOG2985	0	0	0	AT2G28910.1	CXIP4	CAX interacting protein 4
SW_irrigated_Gene_2016	Phvul.007G016400	7	1108190	1111298	3	8197477_F_0_16_T_C	S07_1139472	0.000921347	1	0.0377567	9.05e-06	S07_1139472	1070129	1139472	24.2603	26.4003	PF00646	PTHR24006,PTHR24006:SF449	KOG1947	0	0	GO:0005515	AT2G17020.1	0	F-box/RNI-like superfamily protein
SW_irrigated_Gene_2016	Phvul.007G010800	7	777758	779279	3	8664527	3366301_F_0_41_T_G	0.000266892	1	0.0222925	0.000139	3379639_F_0_60_C_T	825224	827583	26.3289	24.051	PF00230	PTHR19139,PTHR19139:SF151	KOG0223	0	K09873	GO:0016020,GO:0006810,GO:0005215	AT4G01470.1	ATTIP1.3,GAMMA-TIP3,TIP1;3	tonoplast intrinsic protein 1;3
SW_irrigated_Gene_2016	Phvul.007G010900	7	780974	782651	3	8664527	3366301_F_0_41_T_G	0.000266892	1	0.0222925	0.000139	3379639_F_0_60_C_T	825224	827583	26.3289	24.051	PF00646	PTHR32212,PTHR32212:SF138	0	0	0	GO:0005515	AT2G39490.1	0	F-box family protein
SW_irrigated_Gene_2016	Phvul.007G011000	7	783729	785913	3	8664527	3366301_F_0_41_T_G	0.000266892	1	0.0222925	0.000139	3379639_F_0_60_C_T	825224	827583	26.3289	24.051	PF00076	PTHR24012,PTHR24012:SF386	KOG4205	0	K11294	GO:0003676	AT3G55340.1	PHIP1	phragmoplastin interacting protein 1
SW_irrigated_Gene_2016	Phvul.007G011100	7	790203	791709	3	8664527	3366301_F_0_41_T_G	0.000266892	1	0.0222925	0.000139	3379639_F_0_60_C_T	825224	827583	26.3289	24.051	PF06136	PTHR31083,PTHR31083:SF4	0	0	0	0	AT5G59790.1	0	Domain of unknown function (DUF966)
SW_irrigated_Gene_2016	Phvul.007G011200	7	798443	798689	3	8664527	3366301_F_0_41_T_G	0.000266892	1	0.0222925	0.000139	3379639_F_0_60_C_T	825224	827583	26.3289	24.051	0	0	0	0	0	0	AT2G39500.1	0	0
SW_irrigated_Gene_2016	Phvul.007G011300	7	807082	807820	3	8664527	3366301_F_0_41_T_G	0.000266892	1	0.0222925	0.000139	3379639_F_0_60_C_T	825224	827583	26.3289	24.051	PF13912	PTHR26374,PTHR26374:SF207	0	0	0	0	AT2G37430.1	0	C2H2 and C2HC zinc fingers superfamily protein
SW_irrigated_Gene_2016	Phvul.007G011400	7	811835	817152	3	8664527	3366301_F_0_41_T_G	0.000266892	1	0.0222925	0.000139	3379639_F_0_60_C_T	825224	827583	26.3289	24.051	PF16078,PF16870,PF00676,PF02779	PTHR23152,PTHR23152:SF8	0	1.2.4.2	K00164	GO:0016624,GO:0008152,GO:0055114,GO:0030976,GO:0006099,GO:0004591	AT5G65750.1	0	2-oxoglutarate dehydrogenase, E1 component
SW_irrigated_Gene_2016	Phvul.007G007400	7	538867	543155	9	3370154_F_0_28_G_T	3383242_F_0_60_G_A	0.000864212	1	0.0364616	0.000242	3370414	495337	539709	45.7339	22.1921	PF13445,PF10607	PTHR12170,PTHR12170:SF2	KOG0396	0	K18624	0	AT3G55070.1	0	LisH/CRA/RING-U-box domains-containing protein
SW_irrigated_Gene_2016	Phvul.007G007500	7	544658	545080	9	3370154_F_0_28_G_T	3383242_F_0_60_G_A	0.000864212	1	0.0364616	0.000242	3370414	495337	539709	45.7339	22.1921	0	PTHR35630	0	0	0	0	0	0	0
SW_irrigated_Gene_2016	Phvul.007G007600	7	546863	547319	8	3372053	3383242_F_0_60_G_A	0.00105345	1	0.0407594	0.000242	3370414	497646	539709	42.8671	21.3092	0	PTHR35630	0	0	0	0	0	0	0
SW_irrigated_Gene_2016	Phvul.006G178900	6	28114549	28117285	2	3375434_F_0_40_G_A	3372209_F_0_35_G_A	0.00094389	1	0.0380665	0.000255	3375434_F_0_40_G_A	28085230	28085235	16.6026	20.7162	0	PTHR33388,PTHR33388:SF6	0	0	0	0	0	0	0
SW_irrigated_Gene_2016	Phvul.006G179000	6	28119733	28132228	2	3375434_F_0_40_G_A	3372209_F_0_35_G_A	0.00094389	1	0.0380665	0.000255	3375434_F_0_40_G_A	28085230	28085235	16.6026	20.7162	PF00271,PF04408,PF07717	PTHR18934	0	3.6.4.13	K13117	GO:0004386	AT4G18465.1	0	RNA helicase family protein
SW_irrigated_Gene_2016	Phvul.006G179100	6	28131996	28132205	2	3375434_F_0_40_G_A	3372209_F_0_35_G_A	0.00094389	1	0.0380665	0.000255	3375434_F_0_40_G_A	28085230	28085235	16.6026	20.7162	0	0	0	0	0	0	0	0	0
SW_irrigated_Gene_2016	Phvul.006G179200	6	28134173	28135124	2	3375434_F_0_40_G_A	3372209_F_0_35_G_A	0.00094389	1	0.0380665	0.000255	3375434_F_0_40_G_A	28085230	28085235	16.6026	20.7162	0	0	0	0	0	0	0	0	0
SW_irrigated_Gene_2016	Phvul.007G007700	7	554731	555300	6	S07_515645	3383242_F_0_60_G_A	0.000308322	1	0.0228485	0.000242	3370414	515645	539709	40.6024	20.3683	0	PTHR35630	0	0	0	0	0	0	0
SW_irrigated_Gene_2016	Phvul.004G036100	4	4225560	4227139	10	S04_4217710	3378046_F_0_14_G_T	0.000782781	1	0.0359973	0.00102959	3366152	4217710	4271580	51.8101	20.2325	PF00201	PTHR11926,PTHR11926:SF289	0	2.4.1.203	0	GO:0016758,GO:0008152	AT3G02100.1	0	UDP-Glycosyltransferase superfamily protein
SW_irrigated_Gene_2016	Phvul.004G036200	4	4228884	4232558	10	S04_4217710	3378046_F_0_14_G_T	0.000782781	1	0.0359973	0.00102959	3366152	4217710	4271580	51.8101	20.2325	PF00931	PTHR23155,PTHR23155:SF414	KOG4658	0	0	GO:0043531	AT3G14470.1	0	NB-ARC domain-containing disease resistance protein
SW_irrigated_Gene_2016	Phvul.004G036300	4	4235034	4239570	10	S04_4217710	3378046_F_0_14_G_T	0.000782781	1	0.0359973	0.00102959	3366152	4217710	4271580	51.8101	20.2325	PF00931	PTHR23155,PTHR23155:SF414	KOG4658	0	0	GO:0043531	AT3G14470.1	0	NB-ARC domain-containing disease resistance protein
SW_irrigated_Gene_2016	Phvul.004G036400	4	4242965	4244182	10	S04_4217710	3378046_F_0_14_G_T	0.000782781	1	0.0359973	0.00102959	3366152	4217710	4271580	51.8101	20.2325	PF00646,PF08387	PTHR32212,PTHR32212:SF126	0	0	0	GO:0005515	AT3G49030.1	0	FBD, F-box and Leucine Rich Repeat domains containing protein
SW_irrigated_Gene_2016	Phvul.004G036500	4	4256838	4258143	10	S04_4217710	3378046_F_0_14_G_T	0.000782781	1	0.0359973	0.00102959	3366152	4217710	4271580	51.8101	20.2325	PF00646,PF08387	PTHR32212,PTHR32212:SF126	0	0	0	GO:0005515	AT5G56820.1	0	F-box/RNI-like/FBD-like domains-containing protein
SW_irrigated_Gene_2016	Phvul.004G036600	4	4260075	4263947	10	S04_4217710	3378046_F_0_14_G_T	0.000782781	1	0.0359973	0.00102959	3366152	4217710	4271580	51.8101	20.2325	PF00931	PTHR23155,PTHR23155:SF414	KOG4658	0	0	GO:0043531	AT3G14470.1	0	NB-ARC domain-containing disease resistance protein
SW_irrigated_Gene_2016	Phvul.004G036650	4	4265421	4265864	10	S04_4217710	3378046_F_0_14_G_T	0.000782781	1	0.0359973	0.00102959	3366152	4217710	4271580	51.8101	20.2325	PF16212	PTHR24092,PTHR24092:SF75	0	3.6.3.1	0	GO:0016021,GO:0015914,GO:0005524,GO:0004012,GO:0000287	AT3G27870.1	0	ATPase E1-E2 type family protein / haloacid dehalogenase-like hydrolase family protein
SW_irrigated_Gene_2016	Phvul.004G036700	4	4267564	4270968	10	S04_4217710	3378046_F_0_14_G_T	0.000782781	1	0.0359973	0.00102959	3366152	4217710	4271580	51.8101	20.2325	PF00931	PTHR23155,PTHR23155:SF414	KOG4658	0	0	GO:0043531	AT3G14470.1	0	NB-ARC domain-containing disease resistance protein
SW_irrigated_Gene_2016	Phvul.010G121700	10	40276891	40281329	3	3379029_F_0_40_A_G	3379737_F_0_18_T_C	0.000129823	1	0.0162261	9.79e-05	3381060_F_0_37_T_A	40270344	40330519	34.5199	20.086	PF04910	PTHR22684,PTHR22684:SF0	KOG2422	0	0	0	AT2G46900.1	0	0
SW_irrigated_Gene_2016	Phvul.010G121800	10	40284713	40291417	3	3379029_F_0_40_A_G	3379737_F_0_18_T_C	0.000129823	1	0.0162261	9.79e-05	3381060_F_0_37_T_A	40270344	40330519	34.5199	20.086	PF00149	PTHR13315,PTHR13315:SF0	KOG3662	3.1.3.16	0	GO:0016787	AT1G53710.1	0	Calcineurin-like metallo-phosphoesterase superfamily protein
SW_irrigated_Gene_2016	Phvul.010G121900	10	40295008	40295669	3	3379029_F_0_40_A_G	3379737_F_0_18_T_C	0.000129823	1	0.0162261	9.79e-05	3381060_F_0_37_T_A	40270344	40330519	34.5199	20.086	PF08137	PTHR33102,PTHR33102:SF14	0	0	0	0	AT1G53708.1	RTFL9	ROTUNDIFOLIA like 9
SW_irrigated_Gene_2016	Phvul.010G122000	10	40313627	40315766	3	3379029_F_0_40_A_G	3379737_F_0_18_T_C	0.000129823	1	0.0162261	9.79e-05	3381060_F_0_37_T_A	40270344	40330519	34.5199	20.086	PF00076	PTHR24012,PTHR24012:SF402	KOG0149	0	0	GO:0003676	AT3G54770.1	0	RNA-binding (RRM/RBD/RNP motifs) family protein
SW_irrigated_Gene_2016	Phvul.010G122100	10	40326756	40334908	3	3381060_F_0_37_T_A	S10_40366368	0.000210876	1	0.0222925	9.79e-05	3381060_F_0_37_T_A	40279011	40366368	35.4361	19.9093	PF00560,PF08263,PF07714	PTHR27001,PTHR27001:SF81	KOG1187	2.7.10.2	0	GO:0005515,GO:0006468,GO:0004672	AT1G53730.1	SRF6	STRUBBELIG-receptor family 6
SW_irrigated_Gene_2016	Phvul.004G036800	4	4273495	4278920	9	8177540	3378046_F_0_14_G_T	0.000552386	1	0.0328298	0.00102959	3366152	4228302	4271580	51.8082	19.5296	PF00931	PTHR23155,PTHR23155:SF414	KOG4658	0	0	GO:0043531	AT3G14470.1	0	NB-ARC domain-containing disease resistance protein
SW_irrigated_Gene_2016	Phvul.004G036000	4	4215903	4217764	8	S04_4217710	3372882	0.00140327	1	0.0495189	0.00102959	3366152	4217710	4266762	42.159	19.0528	PF00201	PTHR11926,PTHR11926:SF289	0	2.4.1.203	0	GO:0016758,GO:0008152	AT3G02100.1	0	UDP-Glycosyltransferase superfamily protein
SW_irrigated_Gene_2016	Phvul.004G036900	4	4281080	4285120	8	3370288_F_0_46_G_C	3378046_F_0_14_G_T	0.0010615	1	0.0407594	0.00102959	3366152	4234949	4271580	45.1378	18.5262	PF00931	PTHR23155,PTHR23155:SF414	KOG4658	0	0	GO:0043531	AT3G14470.1	0	NB-ARC domain-containing disease resistance protein
SW_irrigated_Gene_2016	Phvul.009G256100	9	37661910	37664412	5	8209088_F_0_53_T_G	8208999_F_0_16_A_G	4.61814e-05	0.469342	0.0119951	6.45e-05	3370797_F_0_27_C_G	37622843	37710831	56.8106	18.4178	PF01096,PF02150	PTHR11239,PTHR11239:SF15	KOG2691	2.7.7.6	K03017	GO:0008270,GO:0006351,GO:0003676,GO:0003899,GO:0003677	AT3G16980.1	NRPB9A,NRPD9A,NRPE9A	RNA polymerases M/15 Kd subunit
SW_irrigated_Gene_2016	Phvul.003G059400	3	8160324	8166356	2	3367944	3370889	0.000864632	1	0.0364616	0.00058	3367944	8141870	8141935	19.8128	17.549	0	PTHR36021,PTHR36021:SF1	0	0	0	0	AT3G59800.1	0	0
SW_irrigated_Gene_2016	Phvul.010G122200	10	40336217	40340163	2	3379737_F_0_18_T_C	S10_40366368	0.000864339	1	0.0364616	0.000389	3379737_F_0_18_T_C	40330519	40366368	20.2594	17.2476	PF07724	PTHR23073	0	3.4.25.1	K03061	GO:0005524	AT1G53750.1	RPT1A	regulatory particle triple-A 1A
SW_irrigated_Gene_2016	Phvul.010G122300	10	40341440	40344123	2	3379737_F_0_18_T_C	S10_40366368	0.000864339	1	0.0364616	0.000389	3379737_F_0_18_T_C	40330519	40366368	20.2594	17.2476	PF10173	PTHR28062,PTHR28062:SF1	KOG4539	0	0	0	AT1G53760.1	0	0
SW_irrigated_Gene_2016	Phvul.010G122400	10	40345705	40348694	2	3379737_F_0_18_T_C	S10_40366368	0.000864339	1	0.0364616	0.000389	3379737_F_0_18_T_C	40330519	40366368	20.2594	17.2476	PF10250	PTHR13398	0	2.4.1.221	K03691	0	AT1G17270.1	0	O-fucosyltransferase family protein
SW_irrigated_Gene_2016	Phvul.010G122500	10	40358141	40358789	2	3379737_F_0_18_T_C	S10_40366368	0.000864339	1	0.0364616	0.000389	3379737_F_0_18_T_C	40330519	40366368	20.2594	17.2476	PF13639	PTHR14155,PTHR14155:SF99	0	0	0	GO:0008270,GO:0005515	AT1G53820.1	0	RING/U-box superfamily protein
SW_irrigated_Gene_2016	Phvul.010G122600	10	40365486	40367062	2	3379737_F_0_18_T_C	S10_40366368	0.000864339	1	0.0364616	0.000389	3379737_F_0_18_T_C	40330519	40366368	20.2594	17.2476	PF13639	PTHR14155,PTHR14155:SF99	0	0	0	GO:0008270,GO:0005515	AT1G72310.1	ATL3	RING/U-box superfamily protein
SW_irrigated_Gene_2016	Phvul.010G122700	10	40368649	40370133	2	3379737_F_0_18_T_C	S10_40366368	0.000864339	1	0.0364616	0.000389	3379737_F_0_18_T_C	40330519	40366368	20.2594	17.2476	0	PTHR35488,PTHR35488:SF1	0	0	0	0	AT3G06840.1	0	0
SW_irrigated_Gene_2016	Phvul.010G122800	10	40377407	40381661	2	3379737_F_0_18_T_C	S10_40366368	0.000864339	1	0.0364616	0.000389	3379737_F_0_18_T_C	40330519	40366368	20.2594	17.2476	PF00179	PTHR24067,PTHR24067:SF42	KOG0894	6.3.2.19	K04554	0	AT1G17280.1	UBC34	ubiquitin-conjugating enzyme 34
SW_irrigated_Gene_2016	Phvul.010G121100	10	40229185	40232601	2	3379029_F_0_40_A_G	3381060_F_0_37_T_A	0.000287348	1	0.0222925	9.79e-05	3381060_F_0_37_T_A	40270344	40279011	21.9356	16.9351	PF02365	PTHR31989,PTHR31989:SF5	0	0	0	GO:0006355,GO:0003677	AT1G33060.2	ANAC014,NAC014	NAC 014
SW_irrigated_Gene_2016	Phvul.010G121200	10	40239048	40242648	2	3379029_F_0_40_A_G	3381060_F_0_37_T_A	0.000287348	1	0.0222925	9.79e-05	3381060_F_0_37_T_A	40270344	40279011	21.9356	16.9351	PF00036,PF03372	PTHR12121,PTHR12121:SF44	KOG2338	0	0	GO:0005509	AT1G02270.1	0	Calcium-binding endonuclease/exonuclease/phosphatase family
SW_irrigated_Gene_2016	Phvul.010G121301	10	40254618	40255522	2	3379029_F_0_40_A_G	3381060_F_0_37_T_A	0.000287348	1	0.0222925	9.79e-05	3381060_F_0_37_T_A	40270344	40279011	21.9356	16.9351	0	PTHR22734,PTHR22734:SF3	0	0	0	0	AT4G01560.1	MEE49	Ribosomal RNA processing Brix domain protein
SW_irrigated_Gene_2016	Phvul.010G121400	10	40260565	40262990	2	3379029_F_0_40_A_G	3381060_F_0_37_T_A	0.000287348	1	0.0222925	9.79e-05	3381060_F_0_37_T_A	40270344	40279011	21.9356	16.9351	PF00504	PTHR21649,PTHR21649:SF13	0	0	K08908	GO:0016020,GO:0009765	AT3G61470.1	LHCA2	photosystem I light harvesting complex gene 2
SW_irrigated_Gene_2016	Phvul.010G121500	10	40263909	40267363	2	3379029_F_0_40_A_G	3381060_F_0_37_T_A	0.000287348	1	0.0222925	9.79e-05	3381060_F_0_37_T_A	40270344	40279011	21.9356	16.9351	PF00149	PTHR32440,PTHR32440:SF0	KOG1432	0	0	GO:0016787	AT5G63140.1	ATPAP29,PAP29	purple acid phosphatase 29
SW_irrigated_Gene_2016	Phvul.010G121600	10	40272872	40274653	2	3379029_F_0_40_A_G	3381060_F_0_37_T_A	0.000287348	1	0.0222925	9.79e-05	3381060_F_0_37_T_A	40270344	40279011	21.9356	16.9351	PF04191	PTHR32251,PTHR32251:SF14	KOG4650	0	0	0	AT2G46890.1	0	Protein of unknown function (DUF1295)
SW_irrigated_Gene_2016	Phvul.009G255700	9	37616893	37617895	3	S09_37569296	3375423	0.000516827	1	0.031265	0.000121	3375423	37569296	37663421	23.2219	16.6724	0	0	0	0	0	0	0	0	0
SW_irrigated_Gene_2016	Phvul.009G114750	9	17690720	17709849	3	3369936	3374608	0.000389189	1	0.0249113	5.19e-05	3369936	17702480	17747111	18.5025	16.0948	0	PTHR19432,PTHR19432:SF38	0	0	K15378	0	AT1G09960.1	ATSUC4,ATSUT4,SUC4,SUT4	sucrose transporter 4
SW_irrigated_Gene_2016	Phvul.009G114900	9	17713031	17715176	3	3369936	3374608	0.000389189	1	0.0249113	5.19e-05	3369936	17702480	17747111	18.5025	16.0948	PF01554	PTHR11206,PTHR11206:SF92	KOG1347	0	K03327	GO:0055085,GO:0016020,GO:0015297,GO:0015238,GO:0006855	AT1G58340.1	ZF14	MATE efflux family protein
SW_irrigated_Gene_2016	Phvul.009G115000	9	17748297	17756641	3	3369936	3374608	0.000389189	1	0.0249113	5.19e-05	3369936	17702480	17747111	18.5025	16.0948	PF04367	PTHR31876,PTHR31876:SF2	0	0	0	0	AT1G43130.1	LCV2	like COV 2
SW_irrigated_Gene_2016	Phvul.009G114500	9	17649464	17652898	2	3369936	3370363_F_0_22_C_T	0.000272137	1	0.0222925	5.19e-05	3369936	17702480	17702492	16.5529	16.0802	PF08263,PF13855,PF00069	PTHR27000,PTHR27000:SF195	KOG1187	2.7.11.1	0	GO:0005515,GO:0006468,GO:0005524,GO:0004672	AT1G09970.1	LRR XI-23,RLK7	Leucine-rich receptor-like protein kinase family protein
SW_irrigated_Gene_2016	Phvul.004G019900	4	2348849	2351324	9	3378553_F_0_46_G_A	3377694_F_0_22_C_T	0.000761977	1	0.0359973	0.000208	S04_2390659	2303486	2395217	57.482	16.0726	PF02704	PTHR23201,PTHR23201:SF18	0	0	0	0	AT5G14920.1	0	Gibberellin-regulated family protein
SW_irrigated_Gene_2016	Phvul.011G017600	11	1381277	1390114	7	3384426_F_0_63_C_T	8212518	0.000339432	1	0.0244811	0.000172	8212518_F_0_5_G_C	1341682	1439066	47.3496	16.0528	PF01535,PF13041	PTHR24015,PTHR24015:SF327	0	0	0	0	AT1G30610.2	EMB2279,EMB88	pentatricopeptide (PPR) repeat-containing protein
SW_irrigated_Gene_2016	Phvul.011G017800	11	1409636	1418241	6	3367438_F_0_31_C_T	8212518	0.000373371	1	0.0244811	0.000172	8212518_F_0_5_G_C	1379088	1439066	40.9607	15.7617	PF12537,PF12430	PTHR15948	0	0	0	GO:0016020	AT4G27630.2	GTG2	GPCR-type G protein 2
SW_irrigated_Gene_2016	Phvul.004G020100	4	2363097	2364604	8	3377630_F_0_63_T_A	3377694_F_0_22_C_T	0.000907181	1	0.0376313	0.000208	S04_2390659	2327026	2395217	52.6285	14.2551	PF00141	PTHR31517,PTHR31517:SF11	0	1.11.1.7	K00430	GO:0055114,GO:0020037,GO:0006979,GO:0004601	AT3G28200.1	0	Peroxidase superfamily protein
SW_irrigated_Gene_2016	Phvul.007G177000	7	29680825	29683298	2	3381533_F_0_63_G_A	3368799	0.000609443	1	0.0328756	2.56e-05	3368799	29706033	29729077	21.0682	13.7794	0	PTHR35512	0	0	0	0	AT5G43680.2	0	0
SW_irrigated_Gene_2016	Phvul.007G177100	7	29687113	29690166	2	3381533_F_0_63_G_A	3368799	0.000609443	1	0.0328756	2.56e-05	3368799	29706033	29729077	21.0682	13.7794	PF01764	PTHR31403,PTHR31403:SF7	KOG4569	3.1.1.32,3.1.1.26,3.1.1.3	0	GO:0006629	AT1G06800.1	PLA-I{gamma}1	alpha/beta-Hydrolases superfamily protein
SW_irrigated_Gene_2016	Phvul.007G177200	7	29691363	29696949	2	3381533_F_0_63_G_A	3368799	0.000609443	1	0.0328756	2.56e-05	3368799	29706033	29729077	21.0682	13.7794	PF00070,PF02852	PTHR22912,PTHR22912:SF135	0	1.8.1.7	K00383	GO:0055114,GO:0016491,GO:0045454	AT3G54660.1	ATGR2,EMB2360,GR	glutathione reductase
SW_irrigated_Gene_2016	Phvul.007G177300	7	29705662	29706639	2	3381533_F_0_63_G_A	3368799	0.000609443	1	0.0328756	2.56e-05	3368799	29706033	29729077	21.0682	13.7794	PF07123	PTHR34552	0	0	K02721	GO:0015979,GO:0009523,GO:0009507	AT2G30570.1	PSBW	photosystem II reaction center W
SW_irrigated_Gene_2016	Phvul.007G177400	7	29707304	29713796	2	3381533_F_0_63_G_A	3368799	0.000609443	1	0.0328756	2.56e-05	3368799	29706033	29729077	21.0682	13.7794	PF01501	PTHR32116,PTHR32116:SF0	0	2.4.1.43	K13648	GO:0016757,GO:0047262	AT1G06780.1	GAUT6	galacturonosyltransferase 6
SW_irrigated_Gene_2016	Phvul.007G177500	7	29717579	29722768	2	3381533_F_0_63_G_A	3368799	0.000609443	1	0.0328756	2.56e-05	3368799	29706033	29729077	21.0682	13.7794	PF00097	PTHR10825,PTHR10825:SF28	KOG2660	0	K16277	GO:0046872	AT2G30580.1	DRIP2	DREB2A-interacting protein 2
SW_irrigated_Gene_2016	Phvul.007G177600	7	29725666	29726739	2	3381533_F_0_63_G_A	3368799	0.000609443	1	0.0328756	2.56e-05	3368799	29706033	29729077	21.0682	13.7794	PF03208	PTHR19317,PTHR19317:SF13	KOG3142	0	0	0	AT1G55190.1	PRA1.F2,PRA7	PRA1 (Prenylated rab acceptor) family protein
SW_irrigated_Gene_2016	Phvul.007G177700	7	29726994	29730828	2	3381533_F_0_63_G_A	3368799	0.000609443	1	0.0328756	2.56e-05	3368799	29706033	29729077	21.0682	13.7794	PF01490	PTHR22950,PTHR22950:SF279	KOG1303	0	0	0	AT1G08230.2	ATGAT1,GAT1	Transmembrane amino acid transporter family protein
SW_irrigated_Gene_2016	Phvul.007G177800	7	29732172	29736463	2	3381533_F_0_63_G_A	3368799	0.000609443	1	0.0328756	2.56e-05	3368799	29706033	29729077	21.0682	13.7794	PF01535,PF13041	PTHR24015,PTHR24015:SF706	0	0	0	0	AT1G52640.1	0	Pentatricopeptide repeat (PPR) superfamily protein
SW_irrigated_Gene_2016	Phvul.007G177900	7	29752186	29754921	2	3381533_F_0_63_G_A	3368799	0.000609443	1	0.0328756	2.56e-05	3368799	29706033	29729077	21.0682	13.7794	PF10533,PF03106	PTHR31282,PTHR31282:SF12	0	0	0	GO:0043565,GO:0006355,GO:0003700	AT2G30590.1	WRKY21	WRKY DNA-binding protein 21
SW_irrigated_Gene_2016	Phvul.009G257900	9	37812012	37815919	6	3382327_F_0_38_C_G	S09_37863205	0.000121187	1	0.0162261	1.67e-06	S09_37863205	37766478	37863205	64.3365	13.6997	PF04437,PF08318	PTHR24016,PTHR24016:SF0	0	0	0	GO:0048193,GO:0005783	AT4G01400.2	0	0
SW_irrigated_Gene_2016	Phvul.009G258000	9	37816098	37817777	6	3382327_F_0_38_C_G	S09_37863205	0.000121187	1	0.0162261	1.67e-06	S09_37863205	37766478	37863205	64.3365	13.6997	PF00076	PTHR24012	KOG0131	0	K13126	GO:0003676	AT1G01080.1	0	RNA-binding (RRM/RBD/RNP motifs) family protein
SW_irrigated_Gene_2016	Phvul.009G257500	9	37786446	37787803	4	3382327_F_0_38_C_G	3368224	0.00118603	1	0.0431877	0.00234086	3381252_F_0_43_T_C	37766478	37837739	29.1796	13.5853	PF08241	PTHR10108,PTHR10108:SF844	0	2.1.1.41	0	GO:0008168,GO:0008152	AT4G19120.2	ERD3	S-adenosyl-L-methionine-dependent methyltransferases superfamily protein
SW_irrigated_Gene_2016	Phvul.009G257600	9	37794932	37800422	4	3382327_F_0_38_C_G	3368224	0.00118603	1	0.0431877	0.00234086	3381252_F_0_43_T_C	37766478	37837739	29.1796	13.5853	PF01565,PF04030	PTHR13878,PTHR13878:SF63	0	1.1.3.8,1.1.3.37	0	GO:0055114,GO:0050660,GO:0016491,GO:0016020,GO:0003885	AT2G46760.1	0	D-arabinono-1,4-lactone oxidase family protein
SW_irrigated_Gene_2016	Phvul.009G257700	9	37804947	37805513	4	3382327_F_0_38_C_G	3368224	0.00118603	1	0.0431877	0.00234086	3381252_F_0_43_T_C	37766478	37837739	29.1796	13.5853	PF14009	PTHR33148,PTHR33148:SF9	0	0	0	0	AT3G61920.1	0	0
SW_irrigated_Gene_2016	Phvul.009G257800	9	37807863	37811144	4	3382327_F_0_38_C_G	3368224	0.00118603	1	0.0431877	0.00234086	3381252_F_0_43_T_C	37766478	37837739	29.1796	13.5853	PF00676	PTHR11516,PTHR11516:SF25	KOG0225	1.2.4.1	K00161	GO:0016624,GO:0008152	AT1G01090.1	PDH-E1 ALPHA	pyruvate dehydrogenase E1 alpha
SW_irrigated_Gene_2016	Phvul.009G255800	9	37626345	37627376	4	8209088_F_0_53_T_G	3370797_F_0_27_C_G	2.45835e-05	0.249842	0.0119951	6.45e-05	3370797_F_0_27_C_G	37622843	37668032	49.4297	13.5684	0	0	0	0	0	0	0	0	0
SW_irrigated_Gene_2016	Phvul.009G255900	9	37645614	37646823	4	8209088_F_0_53_T_G	3370797_F_0_27_C_G	2.45835e-05	0.249842	0.0119951	6.45e-05	3370797_F_0_27_C_G	37622843	37668032	49.4297	13.5684	0	0	0	0	0	0	0	0	0
SW_irrigated_Gene_2016	Phvul.009G257100	9	37759369	37761230	4	8208999_F_0_16_A_G	3381252_F_0_43_T_C	0.00124791	1	0.0443444	0.00234086	3381252_F_0_43_T_C	37710831	37807436	28.6915	13.477	PF08541,PF08392	PTHR31561,PTHR31561:SF1	0	2.3.1.199,2.3.1.119	K15397	GO:0016747,GO:0008610,GO:0016020,GO:0006633	AT1G01120.1	KCS1	3-ketoacyl-CoA synthase 1
SW_irrigated_Gene_2016	Phvul.009G257200	9	37764807	37767150	3	3382327_F_0_38_C_G	3381252_F_0_43_T_C	0.00110246	1	0.0416517	0.00234086	3381252_F_0_43_T_C	37766478	37807436	21.3106	13.2673	0	PTHR37728	0	0	0	0	AT2G46735.1	0	0
SW_irrigated_Gene_2016	Phvul.009G257300	9	37766876	37773532	3	3382327_F_0_38_C_G	3381252_F_0_43_T_C	0.00110246	1	0.0416517	0.00234086	3381252_F_0_43_T_C	37766478	37807436	21.3106	13.2673	PF00076	PTHR24012,PTHR24012:SF479	KOG0117	0	K13161	GO:0003676	AT4G00830.1	0	RNA-binding (RRM/RBD/RNP motifs) family protein
SW_irrigated_Gene_2016	Phvul.009G257400	9	37778470	37782491	3	3382327_F_0_38_C_G	3381252_F_0_43_T_C	0.00110246	1	0.0416517	0.00234086	3381252_F_0_43_T_C	37766478	37807436	21.3106	13.2673	PF04030,PF01565	PTHR13878,PTHR13878:SF63	0	1.1.3.8,1.1.3.37	0	GO:0055114,GO:0016020,GO:0003885,GO:0050660,GO:0016491	AT2G46760.1	0	D-arabinono-1,4-lactone oxidase family protein
SW_irrigated_Gene_2016	Phvul.004G020300	4	2385738	2387529	5	S04_2356123	3377694_F_0_22_C_T	0.000685613	1	0.0331804	0.000208	S04_2390659	2356123	2395217	42.025	13.1084	PF01428	PTHR14677,PTHR14677:SF2	0	0	0	GO:0008270	AT3G28210.1	PMZ,SAP12	zinc finger (AN1-like) family protein
SW_irrigated_Gene_2016	Phvul.004G020400	4	2389768	2390993	5	S04_2356123	3377694_F_0_22_C_T	0.000685613	1	0.0331804	0.000208	S04_2390659	2356123	2395217	42.025	13.1084	PF01428	PTHR14677,PTHR14677:SF2	0	0	0	GO:0008270	AT3G28210.1	PMZ,SAP12	zinc finger (AN1-like) family protein
SW_irrigated_Gene_2016	Phvul.004G020500	4	2391369	2396161	5	S04_2356123	3377694_F_0_22_C_T	0.000685613	1	0.0331804	0.000208	S04_2390659	2356123	2395217	42.025	13.1084	PF02943	PTHR35113,PTHR35113:SF1	0	1.8.7.2	K17892	GO:0055114,GO:0016730	AT2G04700.1	0	ferredoxin thioredoxin reductase catalytic beta chain family protein
SW_irrigated_Gene_2016	Phvul.004G020600	4	2393575	2394183	5	S04_2356123	3377694_F_0_22_C_T	0.000685613	1	0.0331804	0.000208	S04_2390659	2356123	2395217	42.025	13.1084	0	0	0	0	0	0	0	0	0
SW_irrigated_Gene_2016	Phvul.011G019400	11	1542687	1545888	10	8207515_F_0_37_T_G	8200663	0.000315202	1	0.023046	0.000418	3381765_F_0_66_T_C	1495234	1594335	64.7728	13.0158	PF00999	PTHR32468,PTHR32468:SF20	0	0	0	GO:0055085,GO:0016021,GO:0015299,GO:0006812	AT3G17630.1	ATCHX19,CHX19	cation/H+ exchanger 19
SW_irrigated_Gene_2016	Phvul.011G019700	11	1554430	1557742	7	3381765_F_0_66_T_C	8200663	0.000599702	1	0.0328756	0.000418	3381765_F_0_66_T_C	1518615	1594335	51.237	12.9638	PF02466	PTHR14110,PTHR14110:SF0	KOG3225	0	K17790	0	AT3G10110.1	MEE67	Mitochondrial import inner membrane translocase subunit Tim17/Tim22/Tim23 family protein
SW_irrigated_Gene_2016	Phvul.011G019800	11	1560750	1563207	7	3381765_F_0_66_T_C	8200663	0.000599702	1	0.0328756	0.000418	3381765_F_0_66_T_C	1518615	1594335	51.237	12.9638	PF03127,PF00790	PTHR13856,PTHR13856:SF93	KOG1087	0	0	GO:0006886,GO:0005622	AT5G16880.1	0	Target of Myb protein 1
SW_irrigated_Gene_2016	Phvul.011G019900	11	1564115	1569182	7	3381765_F_0_66_T_C	8200663	0.000599702	1	0.0328756	0.000418	3381765_F_0_66_T_C	1518615	1594335	51.237	12.9638	PF03016	PTHR11062,PTHR11062:SF54	KOG1021	2.4.2.41	0	0	AT5G16890.1	0	Exostosin family protein
SW_irrigated_Gene_2016	Phvul.009G256600	9	37717890	37718768	4	3370797	3382327_F_0_38_C_G	0.000350143	1	0.0244811	6.45e-05	3370797_F_0_27_C_G	37668025	37766478	42.3968	12.5008	0	0	0	0	0	0	0	0	0
SW_irrigated_Gene_2016	Phvul.011G172700	11	48102062	48104461	4	3373962	3369801	0.00037077	1	0.0244811	1.99e-06	8196458	48079269	48123181	28.8433	12.1952	0	PTHR33177,PTHR33177:SF6	0	0	0	0	AT1G79160.1	0	0
SW_irrigated_Gene_2016	Phvul.011G172800	11	48110012	48110527	4	3373962	3369801	0.00037077	1	0.0244811	1.99e-06	8196458	48079269	48123181	28.8433	12.1952	PF00319	PTHR11945,PTHR11945:SF229	0	0	0	GO:0046983,GO:0003677	AT3G66656.1	AGL91	AGAMOUS-like 91
SW_irrigated_Gene_2016	Phvul.011G172900	11	48115161	48115611	4	3373962	3369801	0.00037077	1	0.0244811	1.99e-06	8196458	48079269	48123181	28.8433	12.1952	0	0	0	0	0	0	0	0	0
SW_irrigated_Gene_2016	Phvul.011G173000	11	48118390	48124551	4	3373962	3369801	0.00037077	1	0.0244811	1.99e-06	8196458	48079269	48123181	28.8433	12.1952	PF01641	PTHR10173,PTHR10173:SF38	KOG0856	1.8.4.12	K07305	GO:0055114,GO:0033743,GO:0030091,GO:0016671,GO:0006979	AT1G53670.1	ATMSRB1,MSRB1	methionine sulfoxide reductase B 1
SW_irrigated_Gene_2016	Phvul.003G248400	3	48573208	48582349	2	3384300_F_0_42_A_C	3382753_F_0_51_T_C	4.30796e-05	0.437818	0.0119951	1.38e-05	3382753_F_0_51_T_C	48568168	48626279	20.2477	11.9406	PF14694,PF14695	PTHR16057,PTHR16057:SF1	0	0	0	0	AT3G50430.1	0	0
SW_irrigated_Gene_2016	Phvul.003G248600	3	48599315	48601152	2	3384300_F_0_42_A_C	3382753_F_0_51_T_C	4.30796e-05	0.437818	0.0119951	1.38e-05	3382753_F_0_51_T_C	48568168	48626279	20.2477	11.9406	PF00657	PTHR22835,PTHR22835:SF147	0	3.1.1.3	0	GO:0016788	AT2G23540.1	0	GDSL-like Lipase/Acylhydrolase superfamily protein
SW_irrigated_Gene_2016	Phvul.011G019100	11	1516056	1520087	8	8207515_F_0_37_T_G	3368464	0.000407794	1	0.0256717	0.000418	3381765_F_0_66_T_C	1495234	1568213	52.6744	11.8675	0	PTHR23160	0	0	0	0	AT5G16730.1	0	Plant protein of unknown function (DUF827)
SW_irrigated_Gene_2016	Phvul.011G018900	11	1501622	1504641	7	8207515_F_0_37_T_G	3377359_F_0_50_G_A	0.000575614	1	0.0328756	0.000418	3381765_F_0_66_T_C	1495234	1552168	43.637	11.8046	0	PTHR33825,PTHR33825:SF5	0	0	0	0	AT1G08530.1	0	0
SW_irrigated_Gene_2016	Phvul.011G020000	11	1569627	1570190	6	8213935_F_0_17_C_T	8200663	0.00100315	1	0.0392116	0.00054	8200663	1548763	1594335	38.787	11.6574	0	0	0	0	0	0	AT1G78172.1	0	0
SW_irrigated_Gene_2016	Phvul.011G020100	11	1572033	1577347	6	8213935_F_0_17_C_T	8200663	0.00100315	1	0.0392116	0.00054	8200663	1548763	1594335	38.787	11.6574	PF13632,PF14570	PTHR13301,PTHR13301:SF72	0	2.4.2.24	0	0	AT3G03050.1	ATCSLD3,CSLD3,KJK	cellulose synthase-like D3
SW_irrigated_Gene_2016	Phvul.011G020200	11	1580719	1583582	6	8213935_F_0_17_C_T	8200663	0.00100315	1	0.0392116	0.00054	8200663	1548763	1594335	38.787	11.6574	PF13193,PF00501	PTHR24096,PTHR24096:SF169	0	6.2.1.12	K01904	GO:0008152,GO:0003824	AT1G65060.1	4CL3	4-coumarate:CoA ligase 3
SW_irrigated_Gene_2016	Phvul.011G020300	11	1584050	1586928	6	8213935_F_0_17_C_T	8200663	0.00100315	1	0.0392116	0.00054	8200663	1548763	1594335	38.787	11.6574	PF10276	PTHR13156	0	0	K03939	0	AT3G03070.1	0	NADH-ubiquinone oxidoreductase-related
SW_irrigated_Gene_2016	Phvul.011G020400	11	1588049	1589985	6	8213935_F_0_17_C_T	8200663	0.00100315	1	0.0392116	0.00054	8200663	1548763	1594335	38.787	11.6574	PF00581	PTHR12231,PTHR12231:SF108	KOG1530	0	0	0	AT2G21045.1	0	Rhodanese/Cell cycle control phosphatase superfamily protein
SW_irrigated_Gene_2016	Phvul.011G020500	11	1591876	1595127	6	8213935_F_0_17_C_T	8200663	0.00100315	1	0.0392116	0.00054	8200663	1548763	1594335	38.787	11.6574	PF02319,PF08781	PTHR12548	0	0	K04683	GO:0006355,GO:0005667,GO:0003700,GO:0007049	AT5G03415.1	ATDPB,DPB	Transcription factor DP
SW_irrigated_Gene_2016	Phvul.003G252700	3	49199317	49202997	2	3377400_F_0_42_G_T	S03_49251158	0.000987105	1	0.0392116	0.0016723	3377400_F_0_42_G_T	49151165	49251158	13.8954	10.9493	PF14580	PTHR11375	KOG2739	0	0	0	AT3G50690.1	0	Leucine-rich repeat (LRR) family protein
SW_irrigated_Gene_2016	Phvul.011G018500	11	1474883	1477344	7	3377308_F_0_20_G_A	3381765_F_0_66_T_C	7.54853e-05	0.767157	0.0142839	0.000172	8212518_F_0_5_G_C	1439015	1518615	59.1035	10.7675	PF04640	PTHR31065,PTHR31065:SF8	0	0	0	0	AT4G17900.1	0	PLATZ transcription factor family protein
SW_irrigated_Gene_2016	Phvul.009G256300	9	37698834	37699420	4	3375423	8208999_F_0_16_A_G	0.00013092	1	0.0162261	6.45e-05	3370797_F_0_27_C_G	37663421	37710831	49.0346	10.6612	PF00076	PTHR24012,PTHR24012:SF419	0	0	0	GO:0003676	0	0	0
SW_irrigated_Gene_2016	Phvul.009G256400	9	37706059	37708623	4	3375423	8208999_F_0_16_A_G	0.00013092	1	0.0162261	6.45e-05	3370797_F_0_27_C_G	37663421	37710831	49.0346	10.6612	PF00332	PTHR32227,PTHR32227:SF125	0	3.2.1.39	0	GO:0005975,GO:0004553	AT4G16260.1	0	Glycosyl hydrolase superfamily protein
SW_irrigated_Gene_2016	Phvul.009G256500	9	37712191	37713057	4	3375423	8208999_F_0_16_A_G	0.00013092	1	0.0162261	6.45e-05	3370797_F_0_27_C_G	37663421	37710831	49.0346	10.6612	PF00332	PTHR32227,PTHR32227:SF125	0	3.2.1.39	0	GO:0005975,GO:0004553	AT4G16260.1	0	Glycosyl hydrolase superfamily protein
SW_irrigated_Gene_2016	Phvul.011G176600	11	48735306	48748122	4	3374411	3384105_F_0_47_G_A	0.00120261	1	0.0431877	0.000294	3374411	48746361	48788986	25.254	10.614	0	PTHR15052,PTHR15052:SF2	0	0	K15200	0	AT1G19485.1	0	Transducin/WD40 repeat-like superfamily protein
SW_irrigated_Gene_2016	Phvul.011G176700	11	48752664	48756881	4	3374411	3384105_F_0_47_G_A	0.00120261	1	0.0431877	0.000294	3374411	48746361	48788986	25.254	10.614	PF01453,PF07714	PTHR27002,PTHR27002:SF116	KOG1187	2.7.11.1	0	GO:0006468,GO:0004672	AT3G16030.1	CES101	lectin protein kinase family protein
SW_irrigated_Gene_2016	Phvul.011G176800	11	48779440	48792925	4	3374411	3384105_F_0_47_G_A	0.00120261	1	0.0431877	0.000294	3374411	48746361	48788986	25.254	10.614	PF00564,PF07714	PTHR23257,PTHR23257:SF438	KOG0192	2.7.11.1	0	GO:0005515,GO:0006468,GO:0004672	AT1G16270.2	0	Protein kinase superfamily protein with octicosapeptide/Phox/Bem1p domain
SW_irrigated_Gene_2016	Phvul.011G176900	11	48796017	48797663	4	3374411	3384105_F_0_47_G_A	0.00120261	1	0.0431877	0.000294	3374411	48746361	48788986	25.254	10.614	PF03514	PTHR31636,PTHR31636:SF30	0	0	0	0	AT1G50420.1	SCL-3,SCL3	scarecrow-like 3
SW_irrigated_Gene_2016	Phvul.004G020800	4	2408417	2418943	3	S04_2390659	3377694_F_0_22_C_T	0.000523442	1	0.0312926	0.000208	S04_2390659	2390659	2395217	32.8893	10.2744	PF01985	PTHR31846,PTHR31846:SF12	KOG1990	0	0	GO:0003723	AT3G01370.1	ATCFM2,CFM2	CRM family member 2
SW_irrigated_Gene_2016	Phvul.011G018100	11	1449502	1453486	7	8180713	3365978_F_0_48_A_G	8.61311e-05	0.87535	0.01435	0.000172	8212518_F_0_5_G_C	1410128	1502531	51.282	10.1313	PF00226	PTHR24078	0	0	0	0	AT5G16650.1	0	Chaperone DnaJ-domain superfamily protein
SW_irrigated_Gene_2016	Phvul.011G018300	11	1462892	1466422	6	3377308_F_0_20_G_A	3365978_F_0_48_A_G	0.000121045	1	0.0162261	0.000172	8212518_F_0_5_G_C	1439015	1502531	46.6535	10.1256	PF01145	PTHR23222	KOG3090	0	K17081	GO:0016020	AT1G03860.1	ATPHB2,PHB2	prohibitin 2
SW_irrigated_Gene_2016	Phvul.003G017700	3	1703038	1704668	2	3365823_F_0_38_C_A	3367475	0.000670503	1	0.0331804	0.000549	3367475	1751984	1751988	22.0744	10.0149	0	0	0	0	0	0	AT1G29320.1	0	Transducin/WD40 repeat-like superfamily protein
SW_irrigated_Gene_2016	Phvul.003G017800	3	1705849	1707291	2	3365823_F_0_38_C_A	3367475	0.000670503	1	0.0331804	0.000549	3367475	1751984	1751988	22.0744	10.0149	PF13812,PF13041	PTHR24015	0	0	0	0	AT1G22960.1	0	Pentatricopeptide repeat (PPR) superfamily protein
SW_irrigated_Gene_2016	Phvul.003G017900	3	1708284	1709112	2	3365823_F_0_38_C_A	3367475	0.000670503	1	0.0331804	0.000549	3367475	1751984	1751988	22.0744	10.0149	0	PTHR36729	0	0	0	0	AT2G01755.1	0	0
SW_irrigated_Gene_2016	Phvul.003G018000	3	1709386	1722066	2	3365823_F_0_38_C_A	3367475	0.000670503	1	0.0331804	0.000549	3367475	1751984	1751988	22.0744	10.0149	PF02212,PF00350,PF01031	PTHR11566,PTHR11566:SF80	0	0	0	GO:0005525,GO:0003924	AT1G14830.1	ADL1C,ADL5,DL1C,DRP1C	DYNAMIN-like 1C
SW_irrigated_Gene_2016	Phvul.003G018100	3	1728162	1734402	2	3365823_F_0_38_C_A	3367475	0.000670503	1	0.0331804	0.000549	3367475	1751984	1751988	22.0744	10.0149	PF07058	PTHR31246	0	0	0	GO:0008017,GO:0007010	AT1G24764.1	ATMAP70-2,MAP70-2	microtubule-associated proteins 70-2
SW_irrigated_Gene_2016	Phvul.003G018200	3	1736662	1749082	2	3365823_F_0_38_C_A	3367475	0.000670503	1	0.0331804	0.000549	3367475	1751984	1751988	22.0744	10.0149	PF07521,PF16661,PF10996	PTHR11203,PTHR11203:SF37	0	0	K13148	0	AT2G01730.1	ATCPSF73-II,CPSF73-II,EDA26	cleavage and polyadenylation specificity factor 73 kDa subunit-II
SW_irrigated_Gene_2016	Phvul.003G018300	3	1750715	1752822	2	3365823_F_0_38_C_A	3367475	0.000670503	1	0.0331804	0.000549	3367475	1751984	1751988	22.0744	10.0149	PF03719,PF00333	PTHR13718,PTHR13718:SF69	KOG0877	0	K02981	GO:0006412,GO:0005840,GO:0003735,GO:0003723	AT3G57490.1	0	Ribosomal protein S5 family protein
SW_irrigated_Gene_2016	Phvul.003G018400	3	1754431	1755708	2	3365823_F_0_38_C_A	3367475	0.000670503	1	0.0331804	0.000549	3367475	1751984	1751988	22.0744	10.0149	0	0	0	0	0	0	0	0	0
SW_irrigated_Gene_2016	Phvul.003G018450	3	1758467	1758907	2	3365823_F_0_38_C_A	3367475	0.000670503	1	0.0331804	0.000549	3367475	1751984	1751988	22.0744	10.0149	0	0	0	0	0	0	0	0	0
SW_irrigated_Gene_2016	Phvul.003G018500	3	1776802	1777125	2	3365823_F_0_38_C_A	3367475	0.000670503	1	0.0331804	0.000549	3367475	1751984	1751988	22.0744	10.0149	0	0	0	0	0	0	0	0	0
SW_irrigated_Gene_2016	Phvul.003G018600	3	1781679	1782328	2	3365823_F_0_38_C_A	3367475	0.000670503	1	0.0331804	0.000549	3367475	1751984	1751988	22.0744	10.0149	0	0	0	0	0	0	0	0	0
SW_irrigated_Gene_2016	Phvul.003G018700	3	1783683	1784371	2	3365823_F_0_38_C_A	3367475	0.000670503	1	0.0331804	0.000549	3367475	1751984	1751988	22.0744	10.0149	0	0	0	0	0	0	0	0	0
SW_irrigated_Gene_2016	Phvul.003G018800	3	1786798	1787642	2	3365823_F_0_38_C_A	3367475	0.000670503	1	0.0331804	0.000549	3367475	1751984	1751988	22.0744	10.0149	0	0	0	0	0	0	0	0	0
SW_irrigated_Gene_2016	Phvul.003G018900	3	1790130	1790984	2	3365823_F_0_38_C_A	3367475	0.000670503	1	0.0331804	0.000549	3367475	1751984	1751988	22.0744	10.0149	0	0	0	0	0	0	0	0	0
SW_irrigated_Gene_2016	Phvul.003G019000	3	1793554	1794441	2	3365823_F_0_38_C_A	3367475	0.000670503	1	0.0331804	0.000549	3367475	1751984	1751988	22.0744	10.0149	0	0	0	0	0	0	0	0	0
SW_irrigated_Gene_2016	Phvul.011G018700	11	1490217	1493973	4	8207515_F_0_37_T_G	3381765_F_0_66_T_C	0.000589569	1	0.0328756	0.000418	3381765_F_0_66_T_C	1495234	1518615	25.9858	9.8472	PF00294	PTHR10584,PTHR10584:SF162	KOG2854	2.7.1.11	0	0	AT4G27600.1	NARA5	pfkB-like carbohydrate kinase family protein
SW_irrigated_Gene_2016	Phvul.001G040900	1	4318144	4324991	3	3367393_F_0_46_C_A	S01_4370440	0.000619602	1	0.0331422	7.49e-05	S01_4370407	4276340	4370440	18.4374	9.81349	PF01133	PTHR12373	KOG1766	0	0	GO:0045747,GO:0007049,GO:0006221	AT5G10810.1	ATER,ER	enhancer of rudimentary protein, putative
SW_irrigated_Gene_2016	Phvul.008G050600	8	4391200	4396110	3	3381402_F_0_44_A_T	3367529	0.00106681	1	0.0407594	0.0003	3367529	4385193	4396716	24.8125	8.75954	0	PTHR12709,PTHR12709:SF5	0	0	0	0	AT1G75670.1	0	DNA-directed RNA polymerases
SW_irrigated_Gene_2016	Phvul.008G050700	8	4403134	4405911	3	3381402_F_0_44_A_T	3367529	0.00106681	1	0.0407594	0.0003	3367529	4385193	4396716	24.8125	8.75954	PF08263,PF07714	PTHR27000,PTHR27000:SF10	KOG1187	2.7.11.1	0	GO:0006468,GO:0004672	AT5G48380.1	BIR1	BAK1-interacting receptor-like kinase 1
SW_irrigated_Gene_2016	Phvul.009G258600	9	37839373	37845128	6	8203300	S09_37888458	6.85072e-05	0.696239	0.0139248	1.67e-06	S09_37863205	37807375	37888458	58.8388	7.81307	PF08100,PF00891	PTHR11746,PTHR11746:SF103	KOG3178	2.1.1.111	K13066	GO:0046983,GO:0008171	AT5G54160.1	ATOMT1,OMT1	O-methyltransferase 1
SW_irrigated_Gene_2016	Phvul.011G020600	11	1603627	1606026	3	3368464	8200663	0.0012218	1	0.043569	0.00054	8200663	1568213	1594335	21.1358	7.68413	PF03514	PTHR31636,PTHR31636:SF65	0	0	0	0	AT5G66770.1	0	GRAS family transcription factor
SW_irrigated_Gene_2016	Phvul.011G020700	11	1609290	1620804	3	3368464	8200663	0.0012218	1	0.043569	0.00054	8200663	1568213	1594335	21.1358	7.68413	PF00083	PTHR23500,PTHR23500:SF110	KOG0254	0	0	GO:0055085,GO:0022857,GO:0016021	AT5G17010.1	0	Major facilitator superfamily protein
SW_irrigated_Gene_2016	Phvul.006G131100	6	23948575	23956726	6	3370447	3370835_F_0_11_C_T	4.83913e-05	0.491801	0.0119951	3.37e-05	8212321_F_0_26_C_T	23902677	24001164	66.2309	7.33855	PF00266	PTHR11601,PTHR11601:SF17	KOG1549	2.8.1.7,4.4.1.16	K11717	0	AT1G08490.1	ATCPNIFS,ATNFS2,ATSUFS,CPNIFS,SUFS	chloroplastic NIFS-like cysteine desulfurase
SW_irrigated_Gene_2016	Phvul.002G205700	2	37227824	37228545	4	S02_37216371	8208234	0.000367305	1	0.0244811	0.000558	S02_37216372	37216371	37264336	41.5616	6.98488	0	0	0	0	0	0	AT5G08315.1	0	Defensin-like (DEFL) family protein
SW_irrigated_Gene_2016	Phvul.002G206000	2	37257064	37259780	4	S02_37216371	8208234	0.000367305	1	0.0244811	0.000558	S02_37216372	37216371	37264336	41.5616	6.98488	PF01417	PTHR22951,PTHR22951:SF12	KOG0251	0	0	0	AT1G03050.1	0	ENTH/ANTH/VHS superfamily protein
SW_irrigated_Gene_2016	Phvul.006G131900	6	24016287	24021936	7	8212321	3370543	0.000264455	1	0.0222925	3.37e-05	8212321_F_0_26_C_T	23985335	24068734	59.2497	6.69354	PF13456,PF01485	PTHR11685,PTHR11685:SF132	KOG1812	0	0	GO:0016567,GO:0004842	AT4G19670.1	0	RING/U-box superfamily protein
SW_irrigated_Gene_2016	Phvul.006G132000	6	24031630	24033680	7	8212321	3370543	0.000264455	1	0.0222925	3.37e-05	8212321_F_0_26_C_T	23985335	24068734	59.2497	6.69354	PF13920	PTHR10044,PTHR10044:SF121	KOG1100	0	K19042	0	AT4G19700.1	RING	SBP (S-ribonuclease binding protein) family protein
SW_irrigated_Gene_2016	Phvul.006G132100	6	24047583	24055863	5	S06_23998762	3370543	0.000750762	1	0.0359973	0.00019	S06_23998762	23998762	24068734	35.6259	6.67804	PF13774,PF00957	PTHR21136,PTHR21136:SF92	KOG0859	0	K08511	GO:0016192,GO:0016021	AT1G04760.1	ATVAMP726,VAMP726	vesicle-associated membrane protein 726
SW_irrigated_Gene_2016	Phvul.011G176300	11	48708030	48711569	2	3374411	3372995	0.000419315	1	0.0256717	0.000294	3374411	48746361	48756593	22.9159	6.57614	PF01453,PF07714	PTHR27002,PTHR27002:SF116	KOG1187	2.7.11.1	0	GO:0006468,GO:0004672	AT1G11300.1	0	protein serine/threonine kinases;protein kinases;ATP binding;sugar binding;kinases;carbohydrate binding
SW_irrigated_Gene_2016	Phvul.001G040600	1	4339156	4340979	2	S01_4370407	S01_4370440	0.000415608	1	0.0256717	7.49e-05	S01_4370407	4370407	4370440	16.0781	6.52651	PF00069,PF00139	PTHR27007,PTHR27007:SF24	KOG1187	2.7.11.1	0	GO:0006468,GO:0005524,GO:0004672,GO:0030246	AT5G10530.1	0	Concanavalin A-like lectin protein kinase family protein
SW_irrigated_Gene_2016	Phvul.006G131300	6	23972558	23973634	5	8216263_F_0_57_A_C	3370835_F_0_11_C_T	6.05632e-05	0.615504	0.0129254	3.37e-05	8212321_F_0_26_C_T	23928852	24001164	53.6077	6.50402	PF01920	0	0	0	0	GO:0051082,GO:0016272,GO:0006457	AT1G49245.1	0	Prefoldin chaperone subunit family protein
SW_irrigated_Gene_2016	Phvul.006G130900	6	23928325	23946569	4	3370447	8212321_F_0_26_C_T	0.000187112	1	0.0211291	3.37e-05	8212321_F_0_26_C_T	23902677	23985343	45.0934	6.19871	PF01302	PTHR15140,PTHR15140:SF6	KOG2982	0	0	0	AT1G71440.1	PFI,TFC E	tubulin folding cofactor E / Pfifferling (PFI)
SW_irrigated_Gene_2016	Phvul.009G259000	9	37900082	37903087	5	S09_37863138	8215104_F_0_15_A_T	8.29234e-05	0.842751	0.0142839	1.67e-06	S09_37863205	37863138	37945000	45.0437	6.00718	PF08100,PF00891	PTHR11746,PTHR11746:SF103	KOG3178	2.1.1.68	K13066	GO:0046983,GO:0008171	AT5G54160.1	ATOMT1,OMT1	O-methyltransferase 1
SW_irrigated_Gene_2016	Phvul.009G259100	9	37905602	37907795	5	S09_37863138	8215104_F_0_15_A_T	8.29234e-05	0.842751	0.0142839	1.67e-06	S09_37863205	37863138	37945000	45.0437	6.00718	PF08100,PF00891	PTHR11746,PTHR11746:SF103	KOG3178	2.1.1.68	K13066	GO:0046983,GO:0008171	AT5G54160.1	ATOMT1,OMT1	O-methyltransferase 1
SW_irrigated_Gene_2016	Phvul.009G259200	9	37912482	37914486	5	S09_37863138	8215104_F_0_15_A_T	8.29234e-05	0.842751	0.0142839	1.67e-06	S09_37863205	37863138	37945000	45.0437	6.00718	PF08100,PF00891	PTHR11746,PTHR11746:SF103	KOG3178	2.1.1.68	K13066	GO:0046983,GO:0008171	AT5G54160.1	ATOMT1,OMT1	O-methyltransferase 1
SW_irrigated_Gene_2016	Phvul.009G258700	9	37860044	37863222	4	3368224	S09_37888458	7.96022e-05	0.808997	0.0142839	1.67e-06	S09_37863205	37837739	37888458	45.6674	5.92932	PF08100,PF00891	PTHR11746,PTHR11746:SF103	KOG3178	2.1.1.68	K13066	GO:0046983,GO:0008171	AT5G54160.1	ATOMT1,OMT1	O-methyltransferase 1
SW_irrigated_Gene_2016	Phvul.009G258800	9	37875771	37877569	4	3368224	S09_37888458	7.96022e-05	0.808997	0.0142839	1.67e-06	S09_37863205	37837739	37888458	45.6674	5.92932	PF08100,PF00891	PTHR11746,PTHR11746:SF103	KOG3178	2.1.1.68	K13066	GO:0046983,GO:0008171	AT5G54160.1	ATOMT1,OMT1	O-methyltransferase 1
SW_irrigated_Gene_2016	Phvul.009G258900	9	37886611	37888549	4	3368224	S09_37888458	7.96022e-05	0.808997	0.0142839	1.67e-06	S09_37863205	37837739	37888458	45.6674	5.92932	PF08100,PF00891	PTHR11746,PTHR11746:SF103	KOG3178	2.1.1.68	K13066	GO:0046983,GO:0008171	AT5G54160.1	ATOMT1,OMT1	O-methyltransferase 1
SW_irrigated_Gene_2016	Phvul.009G258100	9	37819373	37822166	5	8203300	S09_37863205	6.23186e-05	0.633344	0.0129254	1.67e-06	S09_37863205	37807375	37863205	56.1973	5.87449	PF04939	PTHR17602	KOG1765	0	K14852	GO:0042254,GO:0005634	AT2G37990.1	0	ribosome biogenesis regulatory protein (RRS1) family protein
SW_irrigated_Gene_2016	Phvul.009G258200	9	37823244	37824500	5	8203300	S09_37863205	6.23186e-05	0.633344	0.0129254	1.67e-06	S09_37863205	37807375	37863205	56.1973	5.87449	PF01535,PF13041	PTHR24015,PTHR24015:SF501	0	0	0	0	AT4G01400.3	0	0
SW_irrigated_Gene_2016	Phvul.009G258300	9	37824827	37831225	5	8203300	S09_37863205	6.23186e-05	0.633344	0.0129254	1.67e-06	S09_37863205	37807375	37863205	56.1973	5.87449	PF06203,PF00072	PTHR26402,PTHR26402:SF560	0	0	K12130	GO:0005515,GO:0000160	AT5G24470.1	APRR5,PRR5	pseudo-response regulator 5
SW_irrigated_Gene_2016	Phvul.009G258400	9	37831386	37832324	5	8203300	S09_37863205	6.23186e-05	0.633344	0.0129254	1.67e-06	S09_37863205	37807375	37863205	56.1973	5.87449	PF03168	PTHR31415,PTHR31415:SF9	0	0	0	0	AT4G01410.1	0	Late embryogenesis abundant (LEA) hydroxyproline-rich glycoprotein family
SW_irrigated_Gene_2016	Phvul.009G258500	9	37836023	37838118	5	8203300	S09_37863205	6.23186e-05	0.633344	0.0129254	1.67e-06	S09_37863205	37807375	37863205	56.1973	5.87449	PF14159	PTHR33222,PTHR33222:SF9	0	0	0	0	AT2G46820.2	PSAP,PSI-P,PTAC8,TMP14	photosystem I P subunit
SW_irrigated_Gene_2016	Phvul.006G131700	6	24000641	24005714	6	8212321	18322599_F_0_53_A_G	0.000124819	1	0.0162261	3.37e-05	8212321_F_0_26_C_T	23985335	24050322	52.7664	5.49114	PF16488,PF08699,PF02170,PF02171	PTHR22891,PTHR22891:SF4	0	0	K11593	GO:0005515,GO:0003676	AT1G31280.1	AGO2	Argonaute family protein
SW_irrigated_Gene_2016	Phvul.006G131500	6	23984572	23988866	5	8212321	3369821	0.000179808	1	0.0205325	3.37e-05	8212321_F_0_26_C_T	23985335	24033212	49.1559	5.3759	0	PTHR35549,PTHR35549:SF1	0	0	0	0	AT3G06880.2	0	Transducin/WD40 repeat-like superfamily protein
SW_irrigated_Gene_2016	Phvul.006G131600	6	23996488	23999017	5	8212321	3369821	0.000179808	1	0.0205325	3.37e-05	8212321_F_0_26_C_T	23985335	24033212	49.1559	5.3759	PF10250	PTHR37220,PTHR37220:SF1	0	2.4.1.221	0	0	AT3G05320.1	0	O-fucosyltransferase family protein
SW_irrigated_Gene_2016	Phvul.006G090300	6	20187658	20190724	4	3369794	3381622_F_0_28_G_C	0.00117469	1	0.0431877	0.000363	3381622_F_0_28_G_C	20166810	20228412	23.8155	3.53663	PF02181	PTHR23213,PTHR23213:SF177	0	0	0	0	AT3G05470.1	0	Actin-binding FH2 (formin homology 2) family protein
SW_irrigated_Gene_2016	Phvul.006G090400	6	20193809	20194702	4	3369794	3381622_F_0_28_G_C	0.00117469	1	0.0431877	0.000363	3381622_F_0_28_G_C	20166810	20228412	23.8155	3.53663	PF00125,PF16211	PTHR23430	KOG1756	0	K11251	GO:0003677	AT5G27670.1	HTA7	histone H2A 7
SW_irrigated_Gene_2016	Phvul.006G090500	6	20194905	20199640	4	3369794	3381622_F_0_28_G_C	0.00117469	1	0.0431877	0.000363	3381622_F_0_28_G_C	20166810	20228412	23.8155	3.53663	PF13180,PF00089	PTHR22939,PTHR22939:SF95	KOG1320	3.4.21.107	0	GO:0005515,GO:0006508,GO:0004252	AT5G27660.1	0	Trypsin family protein with PDZ domain
SW_irrigated_Gene_2016	Phvul.006G090511	6	20200322	20205521	4	3369794	3381622_F_0_28_G_C	0.00117469	1	0.0431877	0.000363	3381622_F_0_28_G_C	20166810	20228412	23.8155	3.53663	PF00855	PTHR10688,PTHR10688:SF1	0	0	0	0	AT5G27650.1	0	Tudor/PWWP/MBT superfamily protein
SW_irrigated_Gene_2016	Phvul.006G090600	6	20206744	20211234	4	3369794	3381622_F_0_28_G_C	0.00117469	1	0.0431877	0.000363	3381622_F_0_28_G_C	20166810	20228412	23.8155	3.53663	PF00855	PTHR10688,PTHR10688:SF1	0	0	K17398	0	AT5G27650.1	0	Tudor/PWWP/MBT superfamily protein
SW_irrigated_Gene_2016	Phvul.006G090700	6	20212798	20224694	4	3369794	3381622_F_0_28_G_C	0.00117469	1	0.0431877	0.000363	3381622_F_0_28_G_C	20166810	20228412	23.8155	3.53663	PF00887,PF01344,PF13415	PTHR23244,PTHR23244:SF315	KOG0379	0	0	GO:0000062,GO:0005515	AT3G05420.2	ACBP4	acyl-CoA binding protein 4
SW_irrigated_Gene_2016	Phvul.002G001801	2	164534	165956	2	3368345	3378605_F_0_35_C_G	4.22088e-05	0.428968	0.0119951	7.87e-05	3368345	139713	196850	23.8905	2.96531	PF13520,PF13906	PTHR11785,PTHR11785:SF331	0	0	0	GO:0016020,GO:0015171,GO:0003333	AT5G04770.1	ATCAT6,CAT6	cationic amino acid transporter 6
SW_irrigated_Gene_2016	Phvul.002G001900	2	166530	172326	2	3368345	3378605_F_0_35_C_G	4.22088e-05	0.428968	0.0119951	7.87e-05	3368345	139713	196850	23.8905	2.96531	PF02732	PTHR10150	0	3.6.4.13	K10848	GO:0004518,GO:0003677	AT5G41150.1	ATRAD1,RAD1,UVH1	Restriction endonuclease, type II-like superfamily protein
SW_irrigated_Gene_2016	Phvul.002G205100	2	37176246	37177230	2	S02_37216371	S02_37216372	0.000310252	1	0.0228485	0.000558	S02_37216372	37216371	37216372	23.0751	2.56035	PF01988	PTHR31851,PTHR31851:SF6	KOG4473	0	0	0	AT3G43660.1	0	Vacuolar iron transporter (VIT) family protein
SW_irrigated_Gene_2016	Phvul.002G205500	2	37202150	37202659	2	S02_37216371	S02_37216372	0.000310252	1	0.0228485	0.000558	S02_37216372	37216371	37216372	23.0751	2.56035	0	0	0	0	0	0	0	0	0
SW_irrigated_Gene_2016	Phvul.009G262900	9	38187502	38191659	2	S09_38189357	3365445	0.000158158	1	0.0184754	0.000191	3365445	38189357	38235548	20.5544	2.46228	PF01477,PF00305	PTHR11771,PTHR11771:SF38	0	1.13.11.12	K00454	GO:0005515,GO:0055114,GO:0046872,GO:0016702	AT1G17420.1	LOX3	lipoxygenase 3
SW_irrigated_Gene_2016	Phvul.009G263200	9	38217764	38223545	2	S09_38189357	3365445	0.000158158	1	0.0184754	0.000191	3365445	38189357	38235548	20.5544	2.46228	PF13962,PF13857,PF12796	PTHR24186,PTHR24186:SF8	KOG4412	0	0	0	AT2G31820.1	0	Ankyrin repeat family protein
SW_irrigated_Gene_2016	Phvul.002G321000	2	48647712	48651432	2	3379444_F_0_58_C_T	3371175	0.000222788	1	0.0222925	0.000111	3371175	48696411	48698736	18.0653	0.743678	PF13962,PF12796	PTHR24186,PTHR24186:SF9	KOG0512,KOG0508,KOG4412	0	0	0	AT2G01680.1	0	Ankyrin repeat family protein
SW_irrigated_Gene_JOINT	Phvul.009G116700	9	18008357	18009527	2	8668582	8214871	0.00163941	1	0.04138	0.000489	8214871	18058903	18058955	18.4369	27.2381	PF00187,PF00182	PTHR22595,PTHR22595:SF34	KOG4742	3.2.1.14	K01183	GO:0008061,GO:0016998,GO:0006032,GO:0004568	AT3G12500.1	ATHCHIB,B-CHI,CHI-B,HCHIB,PR-3,PR3	basic chitinase
SW_irrigated_Gene_JOINT	Phvul.007G016600	7	1140970	1145070	3	3380130_F_0_66_G_A	8210783	4.35682e-06	0.0442784	0.000962179	1.65e-07	S07_1139472	1110675	1177914	45.6757	26.9944	PF00924	PTHR31618,PTHR31618:SF1	0	0	0	GO:0055085,GO:0016020	AT1G78610.1	MSL6	mechanosensitive channel of small conductance-like 6
SW_irrigated_Gene_JOINT	Phvul.011G134700	11	32540743	32541129	2	8664658_F_0_12_C_T	8664658_F_0_14_T_C	0.000207146	1	0.0106864	4.66e-06	8664658_F_0_12_C_T	32532591	32532593	23.7246	26.9777	0	PTHR13697,PTHR13697:SF7	0	2.7.1.11	0	0	AT5G56630.1	PFK7	phosphofructokinase 7
SW_irrigated_Gene_JOINT	Phvul.010G130400	10	41163585	41165960	2	3369362	3382850_F_0_52_A_G	0.000124412	1	0.00750336	9.02e-05	3382850_F_0_52_A_G	41125300	41198999	21.9416	26.7611	0	0	0	0	0	0	0	0	0
SW_irrigated_Gene_JOINT	Phvul.007G016300	7	1093549	1105508	3	8197477_F_0_16_T_C	S07_1139472	0.000123538	1	0.00750336	1.65e-07	S07_1139472	1070129	1139472	32.1243	26.4003	PF10497,PF02373	PTHR12549,PTHR12549:SF16	0	0	K15601	0	AT3G07610.3	IBM1	Transcription factor jumonji (jmjC) domain-containing protein
SW_irrigated_Gene_JOINT	Phvul.010G132300	10	41435388	41435977	5	3370653	3377213_F_0_23_T_C	0.000500051	1	0.0182806	3.39e-05	3377213_F_0_23_T_C	41404692	41476459	38.6258	26.0869	PF13639	PTHR14155,PTHR14155:SF110	0	0	0	GO:0008270,GO:0005515	AT5G17600.1	0	RING/U-box superfamily protein
SW_irrigated_Gene_JOINT	Phvul.010G132400	10	41436317	41438160	5	3370653	3377213_F_0_23_T_C	0.000500051	1	0.0182806	3.39e-05	3377213_F_0_23_T_C	41404692	41476459	38.6258	26.0869	PF03357	PTHR10476,PTHR10476:SF12	KOG3230	0	K12191	GO:0007034	AT2G06530.1	VPS2.1	SNF7 family protein
SW_irrigated_Gene_JOINT	Phvul.010G131000	10	41245134	41245573	3	3382850_F_0_52_A_G	3377812_F_0_9_T_A	0.00023557	1	0.0117936	9.02e-05	3382850_F_0_52_A_G	41198999	41275947	32.3368	25.8246	PF00623,PF04997	PTHR19376	0	2.7.7.6	K03046	GO:0006351,GO:0003899,GO:0003677	ATCG00180.1	0	DNA-directed RNA polymerase family protein
SW_irrigated_Gene_JOINT	Phvul.010G131100	10	41246297	41249767	3	3382850_F_0_52_A_G	3377812_F_0_9_T_A	0.00023557	1	0.0117936	9.02e-05	3382850_F_0_52_A_G	41198999	41275947	32.3368	25.8246	PF00067	PTHR24286,PTHR24286:SF67	0	0	0	GO:0055114,GO:0020037,GO:0016705,GO:0005506	AT1G05160.1	ATKAO1,CYP88A3,KAO1	cytochrome P450, family 88, subfamily A, polypeptide 3
SW_irrigated_Gene_JOINT	Phvul.010G130600	10	41184812	41186317	2	3382850_F_0_52_A_G	3375762	0.000989476	1	0.030018	9.02e-05	3382850_F_0_52_A_G	41198999	41225623	17.1773	25.8005	PF00249	PTHR10641,PTHR10641:SF573	KOG0048	0	K09422	0	AT5G35550.1	ATMYB123,ATTT2,MYB123,TT2	Duplicated homeodomain-like superfamily protein
SW_irrigated_Gene_JOINT	Phvul.010G130700	10	41189699	41199521	2	3382850_F_0_52_A_G	3375762	0.000989476	1	0.030018	9.02e-05	3382850_F_0_52_A_G	41198999	41225623	17.1773	25.8005	PF03847	PTHR12264,PTHR12264:SF3	KOG1142	0	K03126	GO:0006352,GO:0005669	AT1G17440.1	EER4,TAF12B	Transcription initiation factor TFIID subunit A
SW_irrigated_Gene_JOINT	Phvul.010G130800	10	41215394	41223325	2	3382850_F_0_52_A_G	3375762	0.000989476	1	0.030018	9.02e-05	3382850_F_0_52_A_G	41198999	41225623	17.1773	25.8005	PF13087,PF13086	PTHR10887,PTHR10887:SF359	KOG1801	0	K10706	0	AT4G30100.1	0	P-loop containing nucleoside triphosphate hydrolases superfamily protein
SW_irrigated_Gene_JOINT	Phvul.003G183900	3	40731471	40732906	7	S03_40734382	8215474	0.000137261	1	0.0077932	0.000354	3383357_F_0_63_G_T	40734382	40779641	50.3015	24.9516	0	0	0	0	0	0	0	0	0
SW_irrigated_Gene_JOINT	Phvul.003G184000	3	40732602	40739483	7	S03_40734382	8215474	0.000137261	1	0.0077932	0.000354	3383357_F_0_63_G_T	40734382	40779641	50.3015	24.9516	PF00076,PF02136	PTHR10693,PTHR10693:SF24	KOG0116	0	0	GO:0003676,GO:0006810,GO:0005622	AT5G60980.1	0	Nuclear transport factor 2 (NTF2) family protein with RNA binding (RRM-RBD-RNP motifs) domain
SW_irrigated_Gene_JOINT	Phvul.003G184100	3	40742426	40744157	7	S03_40734382	8215474	0.000137261	1	0.0077932	0.000354	3383357_F_0_63_G_T	40734382	40779641	50.3015	24.9516	0	PTHR37251	0	0	0	0	AT5G08040.1	TOM5	mitochondrial import receptor subunit TOM5 homolog
SW_irrigated_Gene_JOINT	Phvul.003G184200	3	40748943	40751950	7	S03_40734382	8215474	0.000137261	1	0.0077932	0.000354	3383357_F_0_63_G_T	40734382	40779641	50.3015	24.9516	0	PTHR31413,PTHR31413:SF4	0	0	0	GO:0007165	0	0	0
SW_irrigated_Gene_JOINT	Phvul.003G184300	3	40757681	40760983	7	S03_40734382	8215474	0.000137261	1	0.0077932	0.000354	3383357_F_0_63_G_T	40734382	40779641	50.3015	24.9516	PF03009	PTHR23344,PTHR23344:SF19	KOG2258	3.1.4.46	K01126	GO:0008081,GO:0006629,GO:0008889	AT1G74210.1	0	PLC-like phosphodiesterases superfamily protein
SW_irrigated_Gene_JOINT	Phvul.003G184400	3	40762284	40765768	7	S03_40734382	8215474	0.000137261	1	0.0077932	0.000354	3383357_F_0_63_G_T	40734382	40779641	50.3015	24.9516	PF01336,PF04057,PF16900,PF08646	PTHR23273,PTHR23273:SF4	KOG0851	0	K07466	GO:0003676,GO:0006260,GO:0005634,GO:0003677	AT5G08020.1	ATRPA70B,RPA70B	RPA70-kDa subunit B
SW_irrigated_Gene_JOINT	Phvul.003G184500	3	40774523	40776409	7	S03_40734382	8215474	0.000137261	1	0.0077932	0.000354	3383357_F_0_63_G_T	40734382	40779641	50.3015	24.9516	0	PTHR33673,PTHR33673:SF3	0	0	0	0	AT1G74220.1	0	0
SW_irrigated_Gene_JOINT	Phvul.003G184600	3	40780060	40781424	7	S03_40734382	8215474	0.000137261	1	0.0077932	0.000354	3383357_F_0_63_G_T	40734382	40779641	50.3015	24.9516	PF01080	PTHR10202,PTHR10202:SF13	KOG2736	0	K04505	GO:0016021,GO:0004190	AT2G29900.1	PS2	Presenilin-2
SW_irrigated_Gene_JOINT	Phvul.003G184700	3	40781543	40784851	7	S03_40734382	8215474	0.000137261	1	0.0077932	0.000354	3383357_F_0_63_G_T	40734382	40779641	50.3015	24.9516	PF00076	PTHR24012	0	0	K12741	GO:0003676	AT5G61030.1	GR-RBP3	glycine-rich RNA-binding protein 3
SW_irrigated_Gene_JOINT	Phvul.003G184800	3	40788018	40796239	6	3383357_F_0_63_G_T	8215474	0.000581552	1	0.0203752	0.000354	3383357_F_0_63_G_T	40750185	40779641	39.5786	24.946	0	PTHR33476,PTHR33476:SF7	0	0	0	0	AT5G61040.1	0	0
SW_irrigated_Gene_JOINT	Phvul.003G232400	3	46572933	46575004	2	3377445_F_0_49_A_G	3367061	2.10674e-07	0.00214108	0.000346145	3.15e-07	3377445_F_0_49_A_G	46531172	46599820	47.7376	24.82	PF00155	PTHR11751,PTHR11751:SF431	0	4.4.1.14	K01762	GO:0030170,GO:0009058	AT4G37770.1	ACS8	1-amino-cyclopropane-1-carboxylate synthase 8
SW_irrigated_Gene_JOINT	Phvul.003G183700	3	40699832	40701810	2	S03_40734382	3383357_F_0_63_G_T	1.12649e-05	0.114485	0.00141039	0.000354	3383357_F_0_63_G_T	40734382	40750185	23.4834	24.0554	PF03634	PTHR31072,PTHR31072:SF24	0	0	0	0	AT5G60970.1	TCP5	TEOSINTE BRANCHED 1, cycloidea and PCF transcription factor 5
SW_irrigated_Gene_JOINT	Phvul.003G183800	3	40713283	40718204	2	S03_40734382	3383357_F_0_63_G_T	1.12649e-05	0.114485	0.00141039	0.000354	3383357_F_0_63_G_T	40734382	40750185	23.4834	24.0554	0	PTHR36391,PTHR36391:SF1	0	0	0	0	AT5G08060.1	0	0
SW_irrigated_Gene_JOINT	Phvul.010G134000	10	41591434	41591985	6	3383204_F_0_38_C_G	3384437_F_0_43_C_A	0.000340482	1	0.0150644	1.87e-06	S10_41571980	41543312	41637619	48.5799	23.9449	PF13962	PTHR24177,PTHR24177:SF17	0	0	0	0	AT3G13950.1	0	0
SW_irrigated_Gene_JOINT	Phvul.010G132500	10	41460831	41462538	3	S10_41435506	3377213_F_0_23_T_C	0.000478682	1	0.0179515	3.39e-05	3377213_F_0_23_T_C	41435506	41476459	21.8709	23.827	0	PTHR33541,PTHR33541:SF5	0	0	0	0	AT3G13980.1	0	0
SW_irrigated_Gene_JOINT	Phvul.010G132600	10	41477018	41485378	3	S10_41435506	3377213_F_0_23_T_C	0.000478682	1	0.0179515	3.39e-05	3377213_F_0_23_T_C	41435506	41476459	21.8709	23.827	PF06972	PTHR12758,PTHR12758:SF23	0	0	0	0	AT3G13990.2	0	Kinase-related protein of unknown function (DUF1296)
SW_irrigated_Gene_JOINT	Phvul.010G133600	10	41560292	41562661	5	3383204_F_0_38_C_G	3383526_F_0_38_T_G	0.000124773	1	0.00750336	1.87e-06	S10_41571980	41543312	41611611	48.2089	23.8202	PF00153	PTHR24089,PTHR24089:SF319	KOG0765	0	K15121	0	AT1G72820.1	0	Mitochondrial substrate carrier family protein
SW_irrigated_Gene_JOINT	Phvul.010G133700	10	41568982	41572512	5	3383204_F_0_38_C_G	3383526_F_0_38_T_G	0.000124773	1	0.00750336	1.87e-06	S10_41571980	41543312	41611611	48.2089	23.8202	PF13962	PTHR24177,PTHR24177:SF17	0	0	0	0	AT3G13950.1	0	0
SW_irrigated_Gene_JOINT	Phvul.010G133800	10	41575334	41576590	5	3383204_F_0_38_C_G	3383526_F_0_38_T_G	0.000124773	1	0.00750336	1.87e-06	S10_41571980	41543312	41611611	48.2089	23.8202	PF13962	PTHR24177,PTHR24177:SF17	0	0	0	0	AT3G13950.1	0	0
SW_irrigated_Gene_JOINT	Phvul.010G133900	10	41580527	41581849	5	3383204_F_0_38_C_G	3383526_F_0_38_T_G	0.000124773	1	0.00750336	1.87e-06	S10_41571980	41543312	41611611	48.2089	23.8202	PF13962	PTHR24177,PTHR24177:SF17	0	0	0	0	AT3G13950.1	0	0
SW_irrigated_Gene_JOINT	Phvul.010G133300	10	41539292	41543858	4	3383204_F_0_38_C_G	S10_41591811	5.11325e-05	0.51966	0.0042327	1.87e-06	S10_41571980	41543312	41591811	47.2546	23.8057	PF02045	PTHR12632,PTHR12632:SF12	0	0	K08064	GO:0006355,GO:0003700	AT1G72830.1	ATHAP2C,HAP2C,NF-YA3	nuclear factor Y, subunit A3
SW_irrigated_Gene_JOINT	Phvul.010G133400	10	41548997	41553023	4	3383204_F_0_38_C_G	S10_41591811	5.11325e-05	0.51966	0.0042327	1.87e-06	S10_41571980	41543312	41591811	47.2546	23.8057	PF00628,PF12165	PTHR12321,PTHR12321:SF60	KOG1632	0	0	GO:0005515,GO:0042393,GO:0006355	AT5G20510.1	AL5	alfin-like 5
SW_irrigated_Gene_JOINT	Phvul.010G133500	10	41554623	41557621	4	3383204_F_0_38_C_G	S10_41591811	5.11325e-05	0.51966	0.0042327	1.87e-06	S10_41571980	41543312	41591811	47.2546	23.8057	PF13460	PTHR14194,PTHR14194:SF44	0	0	0	0	AT1G72640.1	0	NAD(P)-binding Rossmann-fold superfamily protein
SW_irrigated_Gene_JOINT	Phvul.010G134100	10	41604427	41643165	6	S10_41571980	8203786_F_0_17_T_C	0.00230584	1	0.0497543	1.87e-06	S10_41571980	41571980	41643112	39.3115	23.5617	PF07728	PTHR22908,PTHR22908:SF66	0	6.6.1.2	K14572	GO:0016887,GO:0005524	AT1G67120.1	0	ATPases;nucleotide binding;ATP binding;nucleoside-triphosphatases;transcription factor binding
SW_irrigated_Gene_JOINT	Phvul.003G243500	3	47940038	47944953	5	8207877_F_0_16_G_A	8195381_F_0_40_G_A	8.59294e-05	0.8733	0.00617761	7.04e-05	8207877_F_0_16_G_A	47919107	47986958	43.8506	23.4862	PF01764	PTHR21493,PTHR21493:SF142	KOG4569	3.1.1.3	0	GO:0006629	AT5G67050.1	0	alpha/beta-Hydrolases superfamily protein
SW_irrigated_Gene_JOINT	Phvul.003G243600	3	47946403	47948560	5	8207877_F_0_16_G_A	8195381_F_0_40_G_A	8.59294e-05	0.8733	0.00617761	7.04e-05	8207877_F_0_16_G_A	47919107	47986958	43.8506	23.4862	0	PTHR11626	0	2.5.1.21	0	0	AT4G34640.1	ERG9,SQS1	squalene synthase 1
SW_irrigated_Gene_JOINT	Phvul.003G243700	3	47950903	47953894	5	8207877_F_0_16_G_A	8195381_F_0_40_G_A	8.59294e-05	0.8733	0.00617761	7.04e-05	8207877_F_0_16_G_A	47919107	47986958	43.8506	23.4862	PF03763	PTHR31471,PTHR31471:SF2	0	0	0	0	AT1G45207.2	0	Remorin family protein
SW_irrigated_Gene_JOINT	Phvul.003G243800	3	47960429	47968149	5	8207877_F_0_16_G_A	8195381_F_0_40_G_A	8.59294e-05	0.8733	0.00617761	7.04e-05	8207877_F_0_16_G_A	47919107	47986958	43.8506	23.4862	PF00498,PF01494	PTHR13789,PTHR13789:SF245	KOG2614	1.14.13.90	K09838	GO:0005515,GO:0071949	AT5G67030.1	ABA1,ATABA1,ATZEP,IBS3,LOS6,NPQ2,ZEP	zeaxanthin epoxidase (ZEP) (ABA1)
SW_irrigated_Gene_JOINT	Phvul.003G231900	3	46482622	46484187	2	8197132	3377445_F_0_49_A_G	6.55678e-06	0.0666366	0.00110565	3.15e-07	3377445_F_0_49_A_G	46449543	46531172	35.1152	22.4596	PF06955,PF00722	PTHR31062,PTHR31062:SF48	0	2.4.1.207,3.2.1.151	K08235	GO:0048046,GO:0016762,GO:0006073,GO:0005618,GO:0005975,GO:0004553	AT5G65730.1	XTH6	xyloglucan endotransglucosylase/hydrolase 6
SW_irrigated_Gene_JOINT	Phvul.002G030901	2	3149160	3161403	5	3372859	3366228_F_0_25_C_A	0.00110795	1	0.0324498	7.7e-06	3372859	3103640	3204047	39.3773	22.4433	0	PTHR10992,PTHR10992:SF838	0	3.1.1.23	0	0	AT2G18360.1	0	alpha/beta-Hydrolases superfamily protein
SW_irrigated_Gene_JOINT	Phvul.003G243400	3	47931790	47936245	3	8207877_F_0_16_G_A	3381778_F_0_44_C_A	5.50043e-05	0.559009	0.00423491	7.04e-05	8207877_F_0_16_G_A	47919107	47952172	42.9721	22.0899	PF01764	PTHR21493,PTHR21493:SF142	KOG4569	3.1.1.3	0	GO:0006629	AT5G42930.1	0	alpha/beta-Hydrolases superfamily protein
SW_irrigated_Gene_JOINT	Phvul.002G030700	2	3111726	3120991	4	3365450_F_0_14_A_T	S02_3168191	5.42963e-05	0.551813	0.0042327	7.7e-06	3372859	3064588	3168191	52.6923	21.9344	PF03813	PTHR17972	0	0	K14544	0	AT1G63810.1	0	0
SW_irrigated_Gene_JOINT	Phvul.002G030800	2	3128223	3129995	3	3372859	S02_3168191	0.00015902	1	0.00897845	7.7e-06	3372859	3103640	3168191	34.6845	21.8881	PF00320	PTHR10071,PTHR10071:SF156	0	0	0	GO:0043565,GO:0008270,GO:0006355,GO:0003700	AT3G50870.1	GATA18,HAN,MNP	GATA type zinc finger transcription factor family protein
SW_irrigated_Gene_JOINT	Phvul.003G243350	3	47893596	47894750	2	8207877_F_0_16_G_A	8207877	5.06066e-05	0.514315	0.0042327	7.04e-05	8207877_F_0_16_G_A	47919107	47919125	31.3536	21.5663	PF00010	PTHR12565,PTHR12565:SF74	0	0	0	GO:0046983	AT5G67060.1	HEC1	basic helix-loop-helix (bHLH) DNA-binding superfamily protein
SW_irrigated_Gene_JOINT	Phvul.011G014200	11	1106474	1109471	17	S11_1063390	3373850	7.1928e-05	0.731004	0.00549627	0.000496	S11_1063390	1063390	1154735	94.9322	21.0188	PF00931	PTHR23155,PTHR23155:SF402	0	0	0	GO:0043531	AT3G46530.1	RPP13	NB-ARC domain-containing disease resistance protein
SW_irrigated_Gene_JOINT	Phvul.007G003200	7	204983	206935	5	8181761	3370117	0.00226658	1	0.0492395	0.000108	8212319_F_0_33_G_T	163633	236298	27.518	20.5449	PF12695	PTHR12277,PTHR12277:SF75	KOG4178	0	K07018	0	AT5G19630.1	0	alpha/beta-Hydrolases superfamily protein
SW_irrigated_Gene_JOINT	Phvul.007G003300	7	206288	211587	5	8181761	3370117	0.00226658	1	0.0492395	0.000108	8212319_F_0_33_G_T	163633	236298	27.518	20.5449	PF03735	PTHR33432,PTHR33432:SF3	KOG4675	0	0	0	AT5G13020.1	0	Emsy N Terminus (ENT)/ plant Tudor-like domains-containing protein
SW_irrigated_Gene_JOINT	Phvul.007G003400	7	213286	218016	5	8181761	3370117	0.00226658	1	0.0492395	0.000108	8212319_F_0_33_G_T	163633	236298	27.518	20.5449	PF02696	PTHR32057	KOG2542	0	0	0	AT5G13030.1	0	0
SW_irrigated_Gene_JOINT	Phvul.007G007800	7	556992	563486	6	S07_515645	3383242_F_0_60_G_A	0.00117252	1	0.0341442	0.000101	S07_515645	515645	539709	33.9606	20.3683	PF09273,PF00856	PTHR13271,PTHR13271:SF11	KOG1338	2.1.1.43	K19199	GO:0005515	AT3G55080.1	0	SET domain-containing protein
SW_irrigated_Gene_JOINT	Phvul.007G003500	7	219422	223034	4	3376919	3370117	0.000844972	1	0.0266691	0.000108	8212319_F_0_33_G_T	173039	236298	24.7677	20.0935	PF09598,PF04774	PTHR12299,PTHR12299:SF24	KOG2945	0	K13199	0	AT4G17520.1	0	Hyaluronan / mRNA binding family
SW_irrigated_Gene_JOINT	Phvul.004G022400	4	2565690	2570832	9	S04_2515942	3368756_F_0_11_A_C	0.00189751	1	0.0444109	0.000358	S04_2567035	2515942	2616823	46.4597	19.9687	PF00132,PF00483	PTHR22572,PTHR22572:SF104	0	2.7.7.13	K00966	GO:0016779,GO:0009058	AT1G74910.1	0	ADP-glucose pyrophosphorylase family protein
SW_irrigated_Gene_JOINT	Phvul.011G013900	11	1072636	1080219	18	S11_1028718	S11_1129800	8.60935e-05	0.874968	0.00617761	0.000496	S11_1063390	1028718	1129800	97.208	19.9399	PF00690,PF12515,PF12710,PF00689,PF00122	PTHR24093,PTHR24093:SF340	0	3.6.3.8	K01537	GO:0005516,GO:0046872,GO:0000166	AT3G57330.1	ACA11	autoinhibited Ca2+-ATPase 11
SW_irrigated_Gene_JOINT	Phvul.011G194900	11	50811977	50817887	20	S11_50767427	S11_50860900	0.00138526	1	0.0373432	8.8e-05	S11_50860864	50767427	50860900	77.3459	19.8497	PF00931	PTHR23155,PTHR23155:SF414	KOG4658	0	0	GO:0043531	AT3G14470.1	0	NB-ARC domain-containing disease resistance protein
SW_irrigated_Gene_JOINT	Phvul.009G112100	9	17309223	17314454	3	S09_17271668	8176475	0.00161027	1	0.0413644	0.000882	S09_17271668	17271668	17360712	26.5806	19.6626	PF01490	PTHR22950,PTHR22950:SF208	KOG1303	0	0	0	AT1G10010.1	AAP8,ATAAP8	amino acid permease 8
SW_irrigated_Gene_JOINT	Phvul.004G027800	4	3197147	3208281	2	3377326_F_0_33_G_A	S04_3204956	3.30894e-05	0.336288	0.00317252	7.48e-05	S04_3204956	3182966	3204956	26.0468	19.5679	PF00005,PF00664	PTHR24221,PTHR24221:SF149	0	3.6.3.44	K05658	GO:0016887,GO:0005524,GO:0055085,GO:0042626,GO:0016021,GO:0006810	AT3G28860.1	ABCB19,ATABCB19,ATMDR1,ATMDR11,ATPGP19,MDR1,MDR11,PGP19	ATP binding cassette subfamily B19
SW_irrigated_Gene_JOINT	Phvul.004G027900	4	3229737	3234269	2	3377326_F_0_33_G_A	S04_3204956	3.30894e-05	0.336288	0.00317252	7.48e-05	S04_3204956	3182966	3204956	26.0468	19.5679	PF10557,PF00888	PTHR11932,PTHR11932:SF86	KOG2167	0	K03869	GO:0031625,GO:0006511	AT1G26830.1	ATCUL3,ATCUL3A,CUL3,CUL3A	cullin 3
SW_irrigated_Gene_JOINT	Phvul.003G067900	3	10175969	10179257	4	8668166_F_0_42_A_G	3381912_F_0_68_A_G	0.00136131	1	0.0368933	8.67e-05	3381912_F_0_68_A_G	10158351	10227479	27.7414	19.5503	PF07714	PTHR27001,PTHR27001:SF160	KOG1187	2.7.11.1	K04733	GO:0006468,GO:0004672	AT2G02800.1	APK2B	protein kinase 2B
SW_irrigated_Gene_JOINT	Phvul.003G068000	3	10186112	10189155	4	8668166_F_0_42_A_G	3381912_F_0_68_A_G	0.00136131	1	0.0368933	8.67e-05	3381912_F_0_68_A_G	10158351	10227479	27.7414	19.5503	PF00022	PTHR11937,PTHR11937:SF47	KOG0680	0	K11662	GO:0035267,GO:0031011,GO:0006355,GO:0006338,GO:0006281	AT3G33520.1	ARP6,ATARP6,ESD1,SUF3	actin-related protein 6
SW_irrigated_Gene_JOINT	Phvul.011G014450	11	1148574	1149437	17	S11_1106769	S11_1199362	0.000283783	1	0.0134144	0.000999	S11_1106778	1106769	1199362	82.4927	19.4399	0	PTHR23155,PTHR23155:SF402	0	0	0	0	AT5G43470.2	HRT,RCY1,RPP8	Disease resistance protein (CC-NBS-LRR class) family
SW_irrigated_Gene_JOINT	Phvul.011G014500	11	1149480	1151453	17	S11_1106769	S11_1199362	0.000283783	1	0.0134144	0.000999	S11_1106778	1106769	1199362	82.4927	19.4399	PF00931	PTHR23155,PTHR23155:SF402	KOG4658	0	0	GO:0043531	AT3G46530.1	RPP13	NB-ARC domain-containing disease resistance protein
SW_irrigated_Gene_JOINT	Phvul.011G014600	11	1154757	1160262	17	S11_1106769	S11_1199362	0.000283783	1	0.0134144	0.000999	S11_1106778	1106769	1199362	82.4927	19.4399	PF13423	PTHR24006,PTHR24006:SF529	KOG1871	3.4.19.12	K11841	0	AT4G30890.2	UBP24	ubiquitin-specific protease 24
SW_irrigated_Gene_JOINT	Phvul.010G133101	10	41519386	41534377	3	3377213_F_0_23_T_C	S10_41571980	5.59433e-06	0.0568552	0.00110526	1.87e-06	S10_41571980	41476459	41571980	50.2902	19.4316	PF14438,PF06741	PTHR12854	KOG2375	0	0	0	AT3G14010.2	CID4	CTC-interacting domain 4
SW_irrigated_Gene_JOINT	Phvul.010G132900	10	41509938	41515718	2	3377213_F_0_23_T_C	3383204_F_0_38_C_G	3.79545e-05	0.385732	0.00357159	3.39e-05	3377213_F_0_23_T_C	41476459	41543312	27.566	19.2492	PF02450	PTHR11440,PTHR11440:SF4	KOG2369	2.3.1.20,2.3.1.158	K00679	GO:0008374,GO:0006629	AT5G13640.1	ATPDAT,PDAT,PDAT1	phospholipid:diacylglycerol acyltransferase
SW_irrigated_Gene_JOINT	Phvul.011G014301	11	1129547	1132371	17	3370760_F_0_25_A_C	3384332_F_0_21_A_G	0.000351349	1	0.0150665	0.000999	S11_1106778	1087672	1167754	76.4007	19.1493	PF00931	PTHR23155,PTHR23155:SF402	0	0	0	GO:0043531	AT3G46530.1	RPP13	NB-ARC domain-containing disease resistance protein
SW_irrigated_Gene_JOINT	Phvul.004G022500	4	2573031	2579728	8	3375337	3368756_F_0_11_A_C	0.00110593	1	0.0324498	0.000358	S04_2567035	2529266	2616823	46.2088	19.0339	PF09261,PF07748,PF01074	PTHR11607,PTHR11607:SF4	0	3.2.1.24,3.2.1.114	K01231	GO:0008270,GO:0004553,GO:0015923,GO:0006013,GO:0005975,GO:0004559	AT5G14950.1	ATGMII,GMII	golgi alpha-mannosidase II
SW_irrigated_Gene_JOINT	Phvul.004G022600	4	2587700	2591687	7	3381626_F_0_57_C_T	3368756_F_0_11_A_C	0.000797491	1	0.0258105	0.000358	S04_2567035	2546888	2616823	46.1802	19.0001	PF05542	PTHR33598,PTHR33598:SF1	0	0	0	0	AT5G14970.1	0	0
SW_irrigated_Gene_JOINT	Phvul.003G059300	3	8100162	8103156	3	3369267_F_0_57_G_A	3370889	3.88631e-06	0.0394966	0.000962179	4.64e-07	3367944	8070715	8141935	54.7085	18.8711	0	0	0	0	0	0	AT1G25540.2	PFT1	phytochrome and flowering time regulatory protein (PFT1)
SW_irrigated_Gene_JOINT	Phvul.011G014000	11	1087210	1089801	16	S11_1063390	S11_1129800	7.53618e-05	0.765902	0.00567335	0.000496	S11_1063390	1063390	1129800	87.7651	18.5871	PF01565,PF09265	PTHR13878,PTHR13878:SF53	0	1.5.99.12	K00279	GO:0055114,GO:0050660,GO:0016491,GO:0019139,GO:0009690	AT3G63440.1	ATCKX6,ATCKX7,CKX6	cytokinin oxidase/dehydrogenase 6
SW_irrigated_Gene_JOINT	Phvul.011G014100	11	1099776	1103695	16	S11_1063390	S11_1129800	7.53618e-05	0.765902	0.00567335	0.000496	S11_1063390	1063390	1129800	87.7651	18.5871	PF00612,PF13178	PTHR32295,PTHR32295:SF35	0	0	0	GO:0005515	AT5G13460.1	IQD11	IQ-domain 11
SW_irrigated_Gene_JOINT	Phvul.009G256200	9	37666725	37688434	5	8209088_F_0_53_T_G	8208999_F_0_16_A_G	0.00229885	1	0.049709	0.000927	3375423	37622843	37710831	32.7755	18.4178	PF00439,PF00400	PTHR16266	KOG0265,KOG0316,KOG0296	0	K11797	GO:0005515	AT5G49430.1	0	WD40/YVTN repeat-like-containing domain;Bromodomain
SW_irrigated_Gene_JOINT	Phvul.003G184900	3	40805736	40812037	5	S03_40775170	8215474	0.00205473	1	0.0465035	0.00129086	8215474	40775170	40779641	26.8181	17.9671	PF01794,PF08414,PF08022,PF08030	PTHR11972,PTHR11972:SF76	KOG0039	1.6.3.1	0	GO:0055114,GO:0050664,GO:0004601,GO:0016491	AT1G64060.1	ATRBOH F,ATRBOHF,RBOH F,RBOHAP108,RBOHF	respiratory burst oxidase protein F
SW_irrigated_Gene_JOINT	Phvul.003G185000	3	40812225	40813511	5	S03_40775170	8215474	0.00205473	1	0.0465035	0.00129086	8215474	40775170	40779641	26.8181	17.9671	0	PTHR36897,PTHR36897:SF1	0	0	0	0	0	0	0
SW_irrigated_Gene_JOINT	Phvul.003G185100	3	40818318	40821919	5	S03_40775170	8215474	0.00205473	1	0.0465035	0.00129086	8215474	40775170	40779641	26.8181	17.9671	PF12171,PF00226	PTHR24078,PTHR24078:SF232	0	0	K09506	0	AT1G74250.1	0	DNAJ heat shock N-terminal domain-containing protein
SW_irrigated_Gene_JOINT	Phvul.011G014400	11	1142010	1144947	15	S11_1106769	3384332_F_0_21_A_G	0.000181674	1	0.00966612	0.000999	S11_1106778	1106769	1167754	73.8718	17.9611	PF00931	PTHR23155,PTHR23155:SF402	0	0	0	GO:0043531	AT3G46530.1	RPP13	NB-ARC domain-containing disease resistance protein
SW_irrigated_Gene_JOINT	Phvul.011G014800	11	1170720	1178217	12	S11_1129731	18323277	0.00155151	1	0.0400203	0.000821	18323277	1129731	1218325	57.8378	17.941	PF14008,PF16656,PF00149	PTHR22953,PTHR22953:SF18	KOG1378	3.1.4.1	0	GO:0016787	AT4G24890.1	ATPAP24,PAP24	purple acid phosphatase 24
SW_irrigated_Gene_JOINT	Phvul.010G129700	10	41082223	41083071	5	3381685_F_0_31_G_A	3369362	0.000753722	1	0.0252808	0.000652	S10_41082496	41040537	41125300	35.1746	17.7743	PF07883	PTHR31238,PTHR31238:SF2	0	0	0	0	AT5G20630.1	ATGER3,GER3,GLP3,GLP3A,GLP3B	germin 3
SW_irrigated_Gene_JOINT	Phvul.010G129800	10	41088076	41088702	5	3381685_F_0_31_G_A	3369362	0.000753722	1	0.0252808	0.000652	S10_41082496	41040537	41125300	35.1746	17.7743	PF07883	PTHR31238,PTHR31238:SF2	0	0	0	0	AT5G20630.1	ATGER3,GER3,GLP3,GLP3A,GLP3B	germin 3
SW_irrigated_Gene_JOINT	Phvul.010G129200	10	41051415	41052050	4	3381685_F_0_31_G_A	S10_41082496	0.000457752	1	0.0174237	0.000652	S10_41082496	41040537	41082496	28.5645	17.6804	0	PTHR35758,PTHR35758:SF1	0	0	0	0	0	0	0
SW_irrigated_Gene_JOINT	Phvul.010G129400	10	41059123	41061262	4	3381685_F_0_31_G_A	S10_41082496	0.000457752	1	0.0174237	0.000652	S10_41082496	41040537	41082496	28.5645	17.6804	PF03514	PTHR31636,PTHR31636:SF40	0	0	0	0	AT3G13840.1	0	GRAS family transcription factor
SW_irrigated_Gene_JOINT	Phvul.010G129600	10	41073641	41074488	4	3381685_F_0_31_G_A	S10_41082496	0.000457752	1	0.0174237	0.000652	S10_41082496	41040537	41082496	28.5645	17.6804	PF00190	PTHR31238,PTHR31238:SF2	0	0	0	GO:0045735	AT5G20630.1	ATGER3,GER3,GLP3,GLP3A,GLP3B	germin 3
SW_irrigated_Gene_JOINT	Phvul.003G059500	3	8167661	8172493	2	3367944	3370889	1.12875e-06	0.0114715	0.00042487	4.64e-07	3367944	8141870	8141935	41.8335	17.549	PF00069	PTHR24055,PTHR24055:SF10	0	2.7.11.24	K14512	GO:0006468,GO:0005524,GO:0004672	AT2G43790.1	ATMAPK6,ATMPK6,MAPK6,MPK6	MAP kinase 6
SW_irrigated_Gene_JOINT	Phvul.003G059600	3	8190188	8197684	2	3367944	3370889	1.12875e-06	0.0114715	0.00042487	4.64e-07	3367944	8141870	8141935	41.8335	17.549	PF13242,PF13344	PTHR19288,PTHR19288:SF3	0	0	0	0	AT5G10460.1	0	Haloacid dehalogenase-like hydrolase (HAD) superfamily protein
SW_irrigated_Gene_JOINT	Phvul.003G059700	3	8191752	8192327	2	3367944	3370889	1.12875e-06	0.0114715	0.00042487	4.64e-07	3367944	8141870	8141935	41.8335	17.549	0	0	0	0	0	0	0	0	0
SW_irrigated_Gene_JOINT	Phvul.011G175100	11	48563021	48571080	3	8176546	3379830_F_0_14_T_C	4.56483e-07	0.00463924	0.000346145	5.17e-09	3377127_F_0_33_C_T	48555001	48579774	57.5211	17.4287	PF15491	PTHR14865	0	0	0	GO:0000723	AT4G09680.1	ATCTC1,CTC1	conserved telomere maintenance component 1
SW_irrigated_Gene_JOINT	Phvul.011G175301	11	48612323	48617623	2	3377127_F_0_33_C_T	3379830_F_0_14_T_C	3.70633e-08	0.000376674	0.000346145	5.17e-09	3377127_F_0_33_C_T	48565137	48579774	48.261	17.0529	PF08276,PF01453,PF07714	PTHR27002,PTHR27002:SF116	0	2.7.11.1	0	GO:0006468,GO:0004672	AT3G16030.1	CES101	lectin protein kinase family protein
SW_irrigated_Gene_JOINT	Phvul.010G141533	10	42363349	42364002	4	3383887_F_0_14_C_T	3379944_F_0_48_G_A	4.95323e-05	0.503397	0.0042327	1.62e-06	3383887_F_0_14_C_T	42372603	42410990	44.7295	17.0168	0	0	0	0	0	0	AT5G14010.1	KNU	C2H2 and C2HC zinc fingers superfamily protein
SW_irrigated_Gene_JOINT	Phvul.010G141600	10	42372582	42373310	4	3383887_F_0_14_C_T	3379944_F_0_48_G_A	4.95323e-05	0.503397	0.0042327	1.62e-06	3383887_F_0_14_C_T	42372603	42410990	44.7295	17.0168	0	0	0	0	0	0	AT1G66140.1	ZFP4	zinc finger protein 4
SW_irrigated_Gene_JOINT	Phvul.010G141700	10	42379478	42388829	4	3383887_F_0_14_C_T	3379944_F_0_48_G_A	4.95323e-05	0.503397	0.0042327	1.62e-06	3383887_F_0_14_C_T	42372603	42410990	44.7295	17.0168	PF00240,PF13423	PTHR24006	0	3.4.19.12	K11843	GO:0005515	AT1G51710.1	ATUBP6,UBP6	ubiquitin-specific protease 6
SW_irrigated_Gene_JOINT	Phvul.010G141900	10	42412883	42423043	4	3383887_F_0_14_C_T	3379944_F_0_48_G_A	4.95323e-05	0.503397	0.0042327	1.62e-06	3383887_F_0_14_C_T	42372603	42410990	44.7295	17.0168	PF02812,PF00208	PTHR11606,PTHR11606:SF4	0	1.4.1.4	K00262	GO:0055114,GO:0016491,GO:0006520	AT1G51720.1	0	Amino acid dehydrogenase family protein
SW_irrigated_Gene_JOINT	Phvul.010G141500	10	42360230	42360955	3	3383887_F_0_14_C_T	3370913	0.00016779	1	0.00921757	1.62e-06	3383887_F_0_14_C_T	42372603	42387971	36.4956	16.3021	0	0	0	0	0	0	AT5G10970.1	0	C2H2 and C2HC zinc fingers superfamily protein
SW_irrigated_Gene_JOINT	Phvul.003G060100	3	8235329	8237531	2	3369609	3374463	1.06848e-05	0.10859	0.00141039	8.24e-07	3374463	8273235	8273294	35.8359	16.2702	PF13561,PF00106	PTHR24322,PTHR24322:SF230	KOG1208	0	0	GO:0016491,GO:0008152	AT3G59710.1	0	NAD(P)-binding Rossmann-fold superfamily protein
SW_irrigated_Gene_JOINT	Phvul.003G060200	3	8251298	8265078	2	3369609	3374463	1.06848e-05	0.10859	0.00141039	8.24e-07	3374463	8273235	8273294	35.8359	16.2702	PF00291	PTHR10314,PTHR10314:SF110	0	2.5.1.47	K01738	0	AT2G43750.1	ACS1,ATCS-B,CPACS1,OASB	O-acetylserine (thiol) lyase B
SW_irrigated_Gene_JOINT	Phvul.003G060300	3	8303727	8306482	2	3369609	3374463	1.06848e-05	0.10859	0.00141039	8.24e-07	3374463	8273235	8273294	35.8359	16.2702	PF08240,PF13602	PTHR11695,PTHR11695:SF552	KOG1198	1.3.1.74	K18980	GO:0055114,GO:0016491,GO:0008270	AT1G23740.1	0	Oxidoreductase, zinc-binding dehydrogenase family protein
SW_irrigated_Gene_JOINT	Phvul.003G060400	3	8309024	8313994	2	3369609	3374463	1.06848e-05	0.10859	0.00141039	8.24e-07	3374463	8273235	8273294	35.8359	16.2702	PF00484	PTHR11002,PTHR11002:SF15	KOG1578	4.2.1.1	K01673	GO:0008270,GO:0004089	AT5G14740.2	BETA CA2,CA18,CA2	carbonic anhydrase 2
SW_irrigated_Gene_JOINT	Phvul.010G131200	10	41251316	41252543	2	3375762	3377812_F_0_9_T_A	0.00149402	1	0.0391333	9.88e-05	3377812_F_0_9_T_A	41225623	41275947	17.0053	16.2258	PF07725,PF00931	PTHR11017,PTHR11017:SF163	0	0	0	GO:0043531	AT5G41750.1	0	Disease resistance protein (TIR-NBS-LRR class) family
SW_irrigated_Gene_JOINT	Phvul.010G131300	10	41264031	41269593	2	3375762	3377812_F_0_9_T_A	0.00149402	1	0.0391333	9.88e-05	3377812_F_0_9_T_A	41225623	41275947	17.0053	16.2258	PF01926,PF02824,PF16897	PTHR11702,PTHR11702:SF26	0	0	K06944	GO:0005525	AT1G72660.1	0	P-loop containing nucleoside triphosphate hydrolases superfamily protein
SW_irrigated_Gene_JOINT	Phvul.010G131400	10	41271586	41278192	2	3375762	3377812_F_0_9_T_A	0.00149402	1	0.0391333	9.88e-05	3377812_F_0_9_T_A	41225623	41275947	17.0053	16.2258	PF00249	PTHR21717,PTHR21717:SF25	0	0	0	0	AT1G72650.1	TRFL6	TRF-like 6
SW_irrigated_Gene_JOINT	Phvul.010G130000	10	41108748	41112395	2	S10_41082496	3369362	0.000376236	1	0.0155434	0.000652	S10_41082496	41082496	41125300	18.2314	16.2235	PF08880,PF08879	PTHR31602,PTHR31602:SF5	0	0	0	GO:0006355,GO:0005634,GO:0005524,GO:0032502,GO:0006351	AT3G13960.1	AtGRF5,GRF5	growth-regulating factor 5
SW_irrigated_Gene_JOINT	Phvul.009G114600	9	17687943	17688488	2	3369936	3370363_F_0_22_C_T	0.00110518	1	0.0324498	0.000233	3369936	17702480	17702492	13.7007	16.0802	PF14144	PTHR22952,PTHR22952:SF199	0	0	0	GO:0043565,GO:0006351	AT1G58330.1	ZW2	transcription factor-related
SW_irrigated_Gene_JOINT	Phvul.004G022000	4	2528498	2531156	10	S04_2481461	3369473_F_0_58_C_T	0.00210388	1	0.0468898	0.000358	S04_2567035	2481461	2577928	50.0338	15.8406	PF00067	PTHR24298,PTHR24298:SF111	KOG0156	0	0	GO:0055114,GO:0020037,GO:0016705,GO:0005506	AT4G31940.1	CYP82C4	cytochrome P450, family 82, subfamily C, polypeptide 4
SW_irrigated_Gene_JOINT	Phvul.004G022800	4	2612197	2614898	4	S04_2567035	3368756_F_0_11_A_C	0.000786751	1	0.0258105	0.000358	S04_2567035	2567035	2616823	25.5099	15.8049	PF14570	PTHR12603,PTHR12603:SF5	KOG2068	0	0	0	AT5G62910.1	0	RING/U-box superfamily protein
SW_irrigated_Gene_JOINT	Phvul.011G017700	11	1404011	1407792	6	3367438_F_0_31_C_T	8212518	9.67829e-05	0.983605	0.00647551	0.000463	8212518_F_0_5_G_C	1379088	1439066	48.2219	15.7617	PF08880,PF08879	PTHR31602,PTHR31602:SF8	0	0	0	GO:0006355,GO:0005634,GO:0005524,GO:0032502,GO:0006351	AT3G13960.1	AtGRF5,GRF5	growth-regulating factor 5
SW_irrigated_Gene_JOINT	Phvul.011G017900	11	1422789	1433340	6	3367438_F_0_31_C_T	8212518	9.67829e-05	0.983605	0.00647551	0.000463	8212518_F_0_5_G_C	1379088	1439066	48.2219	15.7617	0	PTHR33304,PTHR33304:SF1	0	2.3.1.48	0	0	AT3G02890.1	0	RING/FYVE/PHD zinc finger superfamily protein
SW_irrigated_Gene_JOINT	Phvul.007G021600	7	1515229	1516176	5	8178895	3373888	1.13323e-05	0.11517	0.00141039	1.07e-15	3384387_F_0_36_T_G	1476630	1561421	66.5403	15.3867	PF05758	PTHR33163,PTHR33163:SF3	0	0	0	0	ATCG01130.1	0	Ycf1 protein
SW_irrigated_Gene_JOINT	Phvul.011G195000	11	50825721	50829750	16	8215655	3373199	0.00163381	1	0.04138	8.8e-05	S11_50860864	50782280	50871867	64.8175	15.0286	PF00931	PTHR23155,PTHR23155:SF414	KOG4658	0	0	GO:0043531	AT3G14460.1	0	LRR and NB-ARC domains-containing disease resistance protein
SW_irrigated_Gene_JOINT	Phvul.011G015100	11	1198222	1201346	8	3373850	3371693	0.00177062	1	0.0433017	0.000821	18323277	1154735	1248778	47.63	14.8488	PF00295	PTHR31375,PTHR31375:SF28	0	3.2.1.15	0	GO:0005975,GO:0004650	AT3G07970.1	QRT2	Pectin lyase-like superfamily protein
SW_irrigated_Gene_JOINT	Phvul.011G015200	11	1202132	1204327	8	3373850	3371693	0.00177062	1	0.0433017	0.000821	18323277	1154735	1248778	47.63	14.8488	PF00230	PTHR19139,PTHR19139:SF54	KOG0223	0	K09873	GO:0016020,GO:0006810,GO:0005215	AT3G47440.1	TIP5;1	tonoplast intrinsic protein 5;1
SW_irrigated_Gene_JOINT	Phvul.011G015300	11	1205296	1211056	7	3377061_F_0_37_T_C	3371693	0.00168362	1	0.0422485	0.000821	18323277	1159720	1248778	40.463	14.8452	PF01926	PTHR11089,PTHR11089:SF43	KOG1249	1.14.13.39	K13427	GO:0005525	AT3G47450.2	ATNOA1,ATNOS1,NOA1,NOS1,RIF1	P-loop containing nucleoside triphosphate hydrolases superfamily protein
SW_irrigated_Gene_JOINT	Phvul.002G030100	2	3082710	3083288	3	3365450_F_0_14_A_T	3383825_F_0_62_C_G	2.26702e-05	0.230397	0.00230397	7.7e-06	3372859	3064588	3130468	46.0932	14.7752	0	0	0	0	0	0	0	0	0
SW_irrigated_Gene_JOINT	Phvul.002G030201	2	3083987	3087599	3	3365450_F_0_14_A_T	3383825_F_0_62_C_G	2.26702e-05	0.230397	0.00230397	7.7e-06	3372859	3064588	3130468	46.0932	14.7752	0	PTHR12377,PTHR12377:SF3	0	0	0	0	AT3G50845.1	0	Protein of unknown function (DUF59)
SW_irrigated_Gene_JOINT	Phvul.002G030300	2	3090765	3098113	3	3365450_F_0_14_A_T	3383825_F_0_62_C_G	2.26702e-05	0.230397	0.00230397	7.7e-06	3372859	3064588	3130468	46.0932	14.7752	PF00637,PF00780,PF10366,PF10367	PTHR12894,PTHR12894:SF10	0	0	0	GO:0016192,GO:0006886	AT4G36630.1	EMB2754	Vacuolar sorting protein 39
SW_irrigated_Gene_JOINT	Phvul.002G030400	2	3101745	3103438	3	3365450_F_0_14_A_T	3383825_F_0_62_C_G	2.26702e-05	0.230397	0.00230397	7.7e-06	3372859	3064588	3130468	46.0932	14.7752	0	PTHR24078,PTHR24078:SF177	0	0	0	0	AT4G39250.1	ATRL1,RL1,RSM2	RAD-like 1
SW_irrigated_Gene_JOINT	Phvul.002G030500	2	3103794	3104937	3	3365450_F_0_14_A_T	3383825_F_0_62_C_G	2.26702e-05	0.230397	0.00230397	7.7e-06	3372859	3064588	3130468	46.0932	14.7752	0	PTHR33622,PTHR33622:SF3	0	0	0	0	AT2G21640.1	0	0
SW_irrigated_Gene_JOINT	Phvul.002G030600	2	3108232	3110457	3	3365450_F_0_14_A_T	3383825_F_0_62_C_G	2.26702e-05	0.230397	0.00230397	7.7e-06	3372859	3064588	3130468	46.0932	14.7752	PF00071	PTHR11711	KOG0073	0	K07943	GO:0007264,GO:0005525	AT2G18390.1	ARL2,ATARLC1,HAL,TTN5	ADP-ribosylation factor family protein
SW_irrigated_Gene_JOINT	Phvul.008G012500	8	1033164	1034976	13	8201682	S08_1084352	0.000111882	1	0.00724609	9.74e-06	3384367_F_0_18_T_C	991574	1084352	94.7782	14.7706	PF02701	PTHR31992,PTHR31992:SF26	0	0	0	GO:0006355,GO:0003677	AT3G55370.2	OBP3	OBF-binding protein 3
SW_irrigated_Gene_JOINT	Phvul.011G017000	11	1330526	1333591	7	S11_1287698	3378763_F_0_49_A_G	0.00103833	1	0.0313922	0.00057	3378092_F_0_34_C_T	1287698	1379165	42.2537	14.7181	0	PTHR34462,PTHR34462:SF1	0	0	0	0	AT4G27610.2	0	0
SW_irrigated_Gene_JOINT	Phvul.011G015900	11	1247888	1250560	8	S11_1199346	S11_1299563	0.000506681	1	0.0184566	0.000572	S11_1274504	1199346	1299563	61.8622	14.6253	PF03194	PTHR12375,PTHR12375:SF18	KOG0796	0	0	GO:0006376,GO:0005685,GO:0003729	AT5G51410.3	0	LUC7 N_terminus domain-containing protein
SW_irrigated_Gene_JOINT	Phvul.011G015700	11	1231010	1241793	7	S11_1199346	S11_1287698	0.000329549	1	0.0150644	0.000572	S11_1274504	1199346	1287698	57.5607	14.5983	PF01336,PF00152	PTHR22594,PTHR22594:SF20	KOG1885	6.1.1.6	K04567	GO:0003676,GO:0006418,GO:0005524,GO:0004812,GO:0000166	AT3G13490.1	ATKRS-2,OVA5	Lysyl-tRNA synthetase, class II
SW_irrigated_Gene_JOINT	Phvul.011G015800	11	1246042	1246719	7	S11_1199346	S11_1287698	0.000329549	1	0.0150644	0.000572	S11_1274504	1199346	1287698	57.5607	14.5983	PF05648	PTHR12652,PTHR12652:SF17	KOG4186	0	0	GO:0016559,GO:0005779	AT3G47430.1	PEX11B	peroxin 11B
SW_irrigated_Gene_JOINT	Phvul.008G012200	8	1009781	1011481	11	3380418_F_0_33_C_T	S08_1060137	0.00023221	1	0.0117936	9.74e-06	3384367_F_0_18_T_C	971140	1060137	74.876	14.3801	PF04535	PTHR33573,PTHR33573:SF5	0	0	0	0	AT2G39518.1	0	Uncharacterised protein family (UPF0497)
SW_irrigated_Gene_JOINT	Phvul.008G012300	8	1017687	1021947	11	3380418_F_0_33_C_T	S08_1060137	0.00023221	1	0.0117936	9.74e-06	3384367_F_0_18_T_C	971140	1060137	74.876	14.3801	PF04535	PTHR33573,PTHR33573:SF5	0	0	0	0	AT2G39518.1	0	Uncharacterised protein family (UPF0497)
SW_irrigated_Gene_JOINT	Phvul.008G012100	8	1000003	1008768	10	3380418_F_0_33_C_T	3384367_F_0_18_T_C	0.000431128	1	0.0168521	9.74e-06	3384367_F_0_18_T_C	971140	1055792	61.4183	14.2757	PF02969,PF07571	PTHR10221,PTHR10221:SF11	KOG2549	0	K03131	GO:0006352,GO:0005634,GO:0051090	AT1G04950.2	ATTAF6,TAF6,TAFII59	TATA BOX ASSOCIATED FACTOR II 59
SW_irrigated_Gene_JOINT	Phvul.004G020000	4	2354606	2357838	8	3377630_F_0_63_T_A	3377694_F_0_22_C_T	1.39136e-05	0.141404	0.00157115	2.35e-06	S04_2390659	2327026	2395217	86.3682	14.2551	PF01764	PTHR21493,PTHR21493:SF148	0	3.1.1.1	0	GO:0006629	AT5G14930.2	SAG101	senescence-associated gene 101
SW_irrigated_Gene_JOINT	Phvul.004G022100	4	2534447	2535767	8	S04_2515942	3369473_F_0_58_C_T	0.0017529	1	0.0433017	0.000358	S04_2567035	2515942	2577928	44.5248	14.134	0	PTHR33181,PTHR33181:SF6	0	0	0	0	AT5G43150.1	0	0
SW_irrigated_Gene_JOINT	Phvul.004G022200	4	2544238	2547109	8	S04_2515942	3369473_F_0_58_C_T	0.0017529	1	0.0433017	0.000358	S04_2567035	2515942	2577928	44.5248	14.134	PF00657	PTHR22835,PTHR22835:SF239	0	3.2.1.51	0	GO:0016788	AT5G14450.1	0	GDSL-like Lipase/Acylhydrolase superfamily protein
SW_irrigated_Gene_JOINT	Phvul.004G022300	4	2549489	2554195	8	S04_2515942	3369473_F_0_58_C_T	0.0017529	1	0.0433017	0.000358	S04_2567035	2515942	2577928	44.5248	14.134	PF00854	PTHR11654,PTHR11654:SF82	KOG1237	0	0	GO:0016020,GO:0006810,GO:0005215	AT5G14940.1	0	Major facilitator superfamily protein
SW_irrigated_Gene_JOINT	Phvul.011G015400	11	1211914	1212129	6	3384332_F_0_21_A_G	3371693	0.00182785	1	0.0433017	0.000821	18323277	1167754	1248778	36.8518	13.9383	0	0	0	0	0	0	0	0	0
SW_irrigated_Gene_JOINT	Phvul.011G015500	11	1214539	1214742	6	3384332_F_0_21_A_G	3371693	0.00182785	1	0.0433017	0.000821	18323277	1167754	1248778	36.8518	13.9383	0	0	0	0	0	0	0	0	0
SW_irrigated_Gene_JOINT	Phvul.011G015600	11	1216341	1221252	6	3384332_F_0_21_A_G	3371693	0.00182785	1	0.0433017	0.000821	18323277	1167754	1248778	36.8518	13.9383	PF04749	PTHR15907,PTHR15907:SF35	0	0	0	0	AT2G45010.1	0	PLAC8 family protein
SW_irrigated_Gene_JOINT	Phvul.003G009000	3	1020586	1024638	7	3378336_F_0_42_A_T	3375785	0.00121051	1	0.034284	0.00037	S03_1020642	996638	1055352	31.9978	13.8517	PF08311	PTHR14030	0	0	K02178	GO:0007094	AT2G33560.1	BUBR1	BUB1-related (BUB1: budding uninhibited by benzymidazol 1)
SW_irrigated_Gene_JOINT	Phvul.003G009200	3	1032893	1034863	7	3378336_F_0_42_A_T	3375785	0.00121051	1	0.034284	0.00037	S03_1020642	996638	1055352	31.9978	13.8517	PF00067	PTHR24298,PTHR24298:SF164	0	0	0	GO:0055114,GO:0020037,GO:0016705,GO:0005506	AT3G26310.1	CYP71B35	cytochrome P450, family 71, subfamily B, polypeptide 35
SW_irrigated_Gene_JOINT	Phvul.003G009400	3	1040286	1042372	7	3378336_F_0_42_A_T	3375785	0.00121051	1	0.034284	0.00037	S03_1020642	996638	1055352	31.9978	13.8517	PF00067	PTHR24298,PTHR24298:SF164	KOG0156	0	0	GO:0055114,GO:0020037,GO:0016705,GO:0005506	AT3G26300.1	CYP71B34	cytochrome P450, family 71, subfamily B, polypeptide 34
SW_irrigated_Gene_JOINT	Phvul.004G019800	4	2331722	2334844	6	3378553_F_0_46_G_A	3372264_F_0_14_T_C	0.00187288	1	0.0441626	5.82e-05	3372264_F_0_14_T_C	2303486	2357042	34.0086	13.7293	0	PTHR35756,PTHR35756:SF1	0	0	0	0	AT5G14910.1	0	Heavy metal transport/detoxification superfamily protein
SW_irrigated_Gene_JOINT	Phvul.008G012600	8	1044247	1047176	12	8216048_F_0_53_G_T	S08_1084352	0.00012144	1	0.00750336	9.74e-06	3384367_F_0_18_T_C	996020	1084352	87.9795	13.6397	PF00012	PTHR19375,PTHR19375:SF232	0	0	K03283	0	AT5G02500.1	AT-HSC70-1,HSC70,HSC70-1,HSP70-1	heat shock cognate protein 70-1
SW_irrigated_Gene_JOINT	Phvul.008G012700	8	1049566	1053757	11	S08_1000138	S08_1084352	0.000230367	1	0.0117936	9.74e-06	3384367_F_0_18_T_C	1000138	1084352	73.5692	13.5709	0	PTHR37375,PTHR37375:SF1	0	0	0	0	AT3G04020.1	0	0
SW_irrigated_Gene_JOINT	Phvul.009G256000	9	37657043	37657989	4	8209088_F_0_53_T_G	3370797_F_0_27_C_G	0.00145625	1	0.0384412	0.000927	3375423	37622843	37668032	28.9294	13.5684	0	0	0	0	0	0	0	0	0
SW_irrigated_Gene_JOINT	Phvul.011G017300	11	1361570	1362778	6	3379092_F_0_53_A_G	8180713	0.00128492	1	0.0357771	0.00057	3378092_F_0_34_C_T	1316895	1410128	36.7674	13.348	0	PTHR35105,PTHR35105:SF2	0	0	0	0	AT1G64980.1	0	Nucleotide-diphospho-sugar transferases superfamily protein
SW_irrigated_Gene_JOINT	Phvul.011G017400	11	1364125	1366778	6	3379092_F_0_53_A_G	8180713	0.00128492	1	0.0357771	0.00057	3378092_F_0_34_C_T	1316895	1410128	36.7674	13.348	0	PTHR37394,PTHR37394:SF1	0	0	0	0	AT1G12790.1	0	0
SW_irrigated_Gene_JOINT	Phvul.004G020700	4	2400895	2401663	5	S04_2356123	3377694_F_0_22_C_T	7.18024e-06	0.0729728	0.00110565	2.35e-06	S04_2390659	2356123	2395217	71.9021	13.1084	0	0	0	0	0	0	0	0	0
SW_irrigated_Gene_JOINT	Phvul.011G019500	11	1546842	1548335	9	8213784_F_0_17_T_C	8200663	0.002206	1	0.0485272	0.000329	3381765_F_0_66_T_C	1502469	1594335	46.4235	13.0138	0	0	0	0	0	0	0	0	0
SW_irrigated_Gene_JOINT	Phvul.011G019600	11	1551210	1554168	9	8213784_F_0_17_T_C	8200663	0.002206	1	0.0485272	0.000329	3381765_F_0_66_T_C	1502469	1594335	46.4235	13.0138	PF00076	0	0	0	0	GO:0003676	AT4G17720.1	0	RNA-binding (RRM/RBD/RNP motifs) family protein
SW_irrigated_Gene_JOINT	Phvul.011G017500	11	1370208	1379927	5	3378092_F_0_34_C_T	8180713	0.000570146	1	0.0200498	0.00057	3378092_F_0_34_C_T	1324048	1410128	36.7552	12.9562	PF07034	PTHR12748,PTHR12748:SF0	KOG2538	0	K02605	GO:0006260,GO:0005664,GO:0003677	AT5G16690.1	ATORC3,ORC3	origin recognition complex subunit 3
SW_irrigated_Gene_JOINT	Phvul.008G029700	8	2416210	2417313	8	S08_2387573	8208010_F_0_53_G_A	0.00179755	1	0.0433017	8.6e-05	8208010_F_0_53_G_A	2387573	2466312	44.6338	12.8492	PF07714	PTHR27003,PTHR27003:SF41	KOG1187	2.7.11.1	0	GO:0006468,GO:0004672	AT3G51550.1	FER	Malectin/receptor-like protein kinase family protein
SW_irrigated_Gene_JOINT	Phvul.008G030200	8	2420399	2422993	8	S08_2387573	8208010_F_0_53_G_A	0.00179755	1	0.0433017	8.6e-05	8208010_F_0_53_G_A	2387573	2466312	44.6338	12.8492	PF11721,PF07714	PTHR27003,PTHR27003:SF104	KOG1187	2.7.11.1	0	GO:0006468,GO:0004672	AT3G51550.1	FER	Malectin/receptor-like protein kinase family protein
SW_irrigated_Gene_JOINT	Phvul.008G030300	8	2423590	2424244	8	S08_2387573	8208010_F_0_53_G_A	0.00179755	1	0.0433017	8.6e-05	8208010_F_0_53_G_A	2387573	2466312	44.6338	12.8492	0	0	0	0	0	0	0	0	0
SW_irrigated_Gene_JOINT	Phvul.008G030400	8	2427449	2429965	8	S08_2387573	8208010_F_0_53_G_A	0.00179755	1	0.0433017	8.6e-05	8208010_F_0_53_G_A	2387573	2466312	44.6338	12.8492	PF12819,PF07714	PTHR27003,PTHR27003:SF104	KOG1187	2.7.11.1	0	GO:0006468,GO:0004672	AT3G51550.1	FER	Malectin/receptor-like protein kinase family protein
SW_irrigated_Gene_JOINT	Phvul.008G030500	8	2435236	2437937	8	S08_2387573	8208010_F_0_53_G_A	0.00179755	1	0.0433017	8.6e-05	8208010_F_0_53_G_A	2387573	2466312	44.6338	12.8492	0	0	KOG2662	0	0	0	AT5G09690.2	ATMGT7,MGT7,MRS2-7	magnesium transporter 7
SW_irrigated_Gene_JOINT	Phvul.011G019300	11	1538006	1539273	9	8207515_F_0_37_T_G	S11_1580837	0.000435081	1	0.0169415	4.46e-05	8207515_F_0_37_T_G	1495234	1580837	55.2547	12.5497	PF00407	PTHR31213,PTHR31213:SF19	0	4.2.1.78	0	GO:0009607,GO:0006952	AT5G28010.1	0	Polyketide cyclase/dehydrase and lipid transport superfamily protein
SW_irrigated_Gene_JOINT	Phvul.008G030800	8	2465979	2468966	8	3375271	8197471_F_0_15_A_G	0.00199548	1	0.0463366	8.6e-05	8208010_F_0_53_G_A	2423433	2506298	42.0837	12.5249	PF12819,PF07714	PTHR27003,PTHR27003:SF104	KOG1187	2.7.11.1	0	GO:0006468,GO:0004672	AT3G51550.1	FER	Malectin/receptor-like protein kinase family protein
SW_irrigated_Gene_JOINT	Phvul.011G013800	11	1062927	1068070	13	3372284_F_0_66_C_A	S11_1106847	0.000583408	1	0.0203752	0.000496	S11_1063390	1018734	1106847	71.3223	12.4909	PF00642,PF00076	PTHR24009,PTHR24009:SF3	0	0	0	GO:0046872,GO:0003676	AT3G51950.2	0	Zinc finger (CCCH-type) family protein / RNA recognition motif (RRM)-containing protein
SW_irrigated_Gene_JOINT	Phvul.002G029700	2	3053374	3057847	2	3365450_F_0_14_A_T	3372859	3.39219e-06	0.0344748	0.000931752	7.7e-06	3372859	3064588	3103640	38.0188	12.0481	PF00067	PTHR24286,PTHR24286:SF37	KOG0157	0	K09587	GO:0055114,GO:0020037,GO:0016705,GO:0005506	AT3G50660.1	CLM,CYP90B1,DWF4,PSC1,SAV1,SNP2	Cytochrome P450 superfamily protein
SW_irrigated_Gene_JOINT	Phvul.002G029800	2	3061972	3068544	2	3365450_F_0_14_A_T	3372859	3.39219e-06	0.0344748	0.000931752	7.7e-06	3372859	3064588	3103640	38.0188	12.0481	PF02910,PF00890	PTHR11632,PTHR11632:SF54	0	1.3.5.1	K00234	GO:0055114,GO:0016491	AT5G66760.1	SDH1-1	succinate dehydrogenase 1-1
SW_irrigated_Gene_JOINT	Phvul.002G029900	2	3069903	3070900	2	3365450_F_0_14_A_T	3372859	3.39219e-06	0.0344748	0.000931752	7.7e-06	3372859	3064588	3103640	38.0188	12.0481	0	PTHR36410,PTHR36410:SF1	0	0	0	0	AT5G66780.1	0	0
SW_irrigated_Gene_JOINT	Phvul.002G030000	2	3076693	3076842	2	3365450_F_0_14_A_T	3372859	3.39219e-06	0.0344748	0.000931752	7.7e-06	3372859	3064588	3103640	38.0188	12.0481	0	0	0	0	0	0	0	0	0
SW_irrigated_Gene_JOINT	Phvul.003G248500	3	48591523	48592224	2	3384300_F_0_42_A_C	3382753_F_0_51_T_C	6.45088e-06	0.0655603	0.00110565	1.52e-06	3382753_F_0_51_T_C	48568168	48626279	24.1137	11.9406	PF02701	PTHR31992,PTHR31992:SF12	0	0	0	GO:0006355,GO:0003677	AT3G50410.1	OBP1	OBF binding protein 1
SW_irrigated_Gene_JOINT	Phvul.003G248700	3	48615911	48620478	2	3384300_F_0_42_A_C	3382753_F_0_51_T_C	6.45088e-06	0.0655603	0.00110565	1.52e-06	3382753_F_0_51_T_C	48568168	48626279	24.1137	11.9406	0	PTHR14237,PTHR14237:SF31	0	2.8.1.9	0	0	AT2G23520.1	0	Pyridoxal phosphate (PLP)-dependent transferases superfamily protein
SW_irrigated_Gene_JOINT	Phvul.011G019200	11	1524185	1525700	8	8207515_F_0_37_T_G	3368464	0.000290338	1	0.0135977	4.46e-05	8207515_F_0_37_T_G	1495234	1568213	55.0681	11.8675	PF00249	PTHR10641,PTHR10641:SF671	KOG0048	0	K09422	0	AT5G16770.1	AtMYB9,MYB9	myb domain protein 9
SW_irrigated_Gene_JOINT	Phvul.011G019000	11	1506480	1510467	7	8207515_F_0_37_T_G	3377359_F_0_50_G_A	0.000341839	1	0.0150644	4.46e-05	8207515_F_0_37_T_G	1495234	1552168	46.803	11.8046	0	PTHR35106	0	0	0	0	AT1G65000.1	0	0
SW_irrigated_Gene_JOINT	Phvul.008G050100	8	4352525	4353889	5	3372525	3367529	2.2361e-06	0.0227255	0.000710171	1.42e-07	3367529	4308591	4396716	85.3765	11.7766	PF03479	PTHR31100,PTHR31100:SF14	0	0	0	0	AT4G17800.1	0	Predicted AT-hook DNA-binding family protein
SW_irrigated_Gene_JOINT	Phvul.011G018800	11	1494883	1500587	6	8207515_F_0_37_T_G	3372384_F_0_30_A_G	0.0007477	1	0.0252454	4.46e-05	8207515_F_0_37_T_G	1495234	1548776	37.5877	11.7691	PF08045	PTHR34065,PTHR34065:SF1	0	0	0	0	AT4G27750.1	ISI1	binding
SW_irrigated_Gene_JOINT	Phvul.002G239600	2	41166374	41173478	5	S02_41147142	8180748	0.000554401	1	0.0197697	0.00103149	S02_41147216	41147142	41214133	35.9332	11.7132	PF07714	PTHR24057,PTHR24057:SF5	0	2.7.11.1,2.7.11.26	K14502	GO:0006468,GO:0004672	AT1G06390.1	ATGSK1,ATSK2-3,ATSK22,BIL2,GSK1,SK22	GSK3/SHAGGY-like protein kinase 1
SW_irrigated_Gene_JOINT	Phvul.002G239700	2	41182352	41186069	5	S02_41147142	8180748	0.000554401	1	0.0197697	0.00103149	S02_41147216	41147142	41214133	35.9332	11.7132	PF12906	PTHR23012,PTHR23012:SF76	0	0	0	GO:0008270	AT2G34200.1	0	RING/FYVE/PHD zinc finger superfamily protein
SW_irrigated_Gene_JOINT	Phvul.008G050000	8	4336519	4342454	4	3372525	3381402_F_0_53_T_A	1.29211e-05	0.131317	0.00153221	7.53e-07	3381402_F_0_44_A_T	4308591	4385202	57.6811	11.7084	PF02874,PF00306,PF00006	PTHR15184,PTHR15184:SF53	0	3.6.3.6	K02147	GO:0046034,GO:0015992,GO:0033178,GO:0016820,GO:0015991,GO:0005524	AT4G38510.5	0	ATPase, V1 complex, subunit B protein
SW_irrigated_Gene_JOINT	Phvul.008G030900	8	2474249	2474931	7	S08_2428037	8197471_F_0_15_A_G	0.00140185	1	0.0376905	8.6e-05	8208010_F_0_53_G_A	2428037	2506298	41.8646	11.6444	0	0	0	0	0	0	0	0	0
SW_irrigated_Gene_JOINT	Phvul.008G031000	8	2485492	2487900	6	S08_2436509	8197471_F_0_15_A_G	0.00185375	1	0.0438132	8.6e-05	8208010_F_0_53_G_A	2436509	2506298	34.4255	11.6406	0	PTHR13593,PTHR13593:SF46	0	0	0	0	AT1G13680.1	0	PLC-like phosphodiesterases superfamily protein
SW_irrigated_Gene_JOINT	Phvul.008G031100	8	2491002	2491937	5	3384524_F_0_42_T_A	8197471_F_0_15_A_G	0.00180216	1	0.0433017	8.6e-05	8208010_F_0_53_G_A	2442492	2506298	27.4659	11.637	PF00069	PTHR27003,PTHR27003:SF41	KOG1187	2.7.11.1	0	GO:0006468,GO:0005524,GO:0004672	AT3G51550.1	FER	Malectin/receptor-like protein kinase family protein
SW_irrigated_Gene_JOINT	Phvul.008G031200	8	2490856	2498389	5	3384524_F_0_42_T_A	8197471_F_0_15_A_G	0.00180216	1	0.0433017	8.6e-05	8208010_F_0_53_G_A	2442492	2506298	27.4659	11.637	PF00931	PTHR23155,PTHR23155:SF402	KOG4658	0	0	GO:0043531	AT1G50180.1	0	NB-ARC domain-containing disease resistance protein
SW_irrigated_Gene_JOINT	Phvul.010G127900	10	40853970	40856658	3	8212450	3365988	0.00214697	1	0.0476412	0.0002	8212450	40846175	40901993	20.0381	11.6257	PF01423	PTHR15588,PTHR15588:SF10	KOG1782	0	K12620	0	AT3G14080.2	0	Small nuclear ribonucleoprotein family protein
SW_irrigated_Gene_JOINT	Phvul.010G128000	10	40859474	40861537	3	8212450	3365988	0.00214697	1	0.0476412	0.0002	8212450	40846175	40901993	20.0381	11.6257	0	PTHR34045,PTHR34045:SF3	0	0	0	0	AT1G72490.1	0	0
SW_irrigated_Gene_JOINT	Phvul.011G016000	11	1254475	1260086	6	18323277	S11_1299563	0.00039397	1	0.0160157	0.000572	S11_1274504	1218325	1299563	53.2413	11.6027	PF10191	PTHR21443	0	0	0	GO:0017119,GO:0006886	AT5G51430.1	EYE	conserved oligomeric Golgi complex component-related / COG complex component-related
SW_irrigated_Gene_JOINT	Phvul.011G016100	11	1263419	1264452	6	18323277	S11_1299563	0.00039397	1	0.0160157	0.000572	S11_1274504	1218325	1299563	53.2413	11.6027	PF00011	PTHR11527,PTHR11527:SF95	KOG0710	0	K13993	0	AT4G25200.1	ATHSP23.6-MITO,HSP23.6-MITO	mitochondrion-localized small heat shock protein 23.6
SW_irrigated_Gene_JOINT	Phvul.011G016200	11	1265556	1266582	6	18323277	S11_1299563	0.00039397	1	0.0160157	0.000572	S11_1274504	1218325	1299563	53.2413	11.6027	PF00011	PTHR11527,PTHR11527:SF95	0	0	K13993	0	AT4G25200.1	ATHSP23.6-MITO,HSP23.6-MITO	mitochondrion-localized small heat shock protein 23.6
SW_irrigated_Gene_JOINT	Phvul.008G012400	8	1021883	1025917	10	8201682	S08_1060137	0.000253726	1	0.0126403	9.74e-06	3384367_F_0_18_T_C	991574	1060137	67.1045	11.5666	PF01985	PTHR31426,PTHR31426:SF3	0	0	0	GO:0003723	AT4G13070.1	0	RNA-binding CRS1 / YhbY (CRM) domain protein
SW_irrigated_Gene_JOINT	Phvul.003G009500	3	1051164	1052871	6	3379125_F_0_61_T_G	3375785	0.000683399	1	0.0232287	0.00037	S03_1020642	1005311	1055352	31.7177	11.5428	PF00067	PTHR24298,PTHR24298:SF164	KOG0156	0	0	GO:0055114,GO:0020037,GO:0016705,GO:0005506	AT3G26300.1	CYP71B34	cytochrome P450, family 71, subfamily B, polypeptide 34
SW_irrigated_Gene_JOINT	Phvul.008G030600	8	2439471	2440616	7	3375271	8208010_F_0_53_G_A	0.00207282	1	0.0465035	8.6e-05	8208010_F_0_53_G_A	2423433	2466312	37.3312	11.5317	PF02485	PTHR19297,PTHR19297:SF114	0	0	0	GO:0016020,GO:0008375	AT5G39990.1	0	Core-2/I-branching beta-1,6-N-acetylglucosaminyltransferase family protein
SW_irrigated_Gene_JOINT	Phvul.008G030700	8	2442265	2445024	7	3375271	8208010_F_0_53_G_A	0.00207282	1	0.0465035	8.6e-05	8208010_F_0_53_G_A	2423433	2466312	37.3312	11.5317	PF12819,PF07714	PTHR27003,PTHR27003:SF104	KOG1187	2.7.11.1	0	GO:0006468,GO:0004672	AT3G51550.1	FER	Malectin/receptor-like protein kinase family protein
SW_irrigated_Gene_JOINT	Phvul.008G030750	8	2446206	2446688	7	3375271	8208010_F_0_53_G_A	0.00207282	1	0.0465035	8.6e-05	8208010_F_0_53_G_A	2423433	2466312	37.3312	11.5317	0	0	0	0	0	0	0	0	0
SW_irrigated_Gene_JOINT	Phvul.006G072600	6	18540898	18542970	3	3383159_F_0_44_C_G	3368758	0.000279932	1	0.0134144	9.99e-05	3368758	18498400	18585940	34.0705	11.4102	PF03227	PTHR13234,PTHR13234:SF8	KOG3160	0	K08059	0	AT1G07080.1	0	Thioredoxin superfamily protein
SW_irrigated_Gene_JOINT	Phvul.006G072700	6	18547370	18551334	3	3383159_F_0_44_C_G	3368758	0.000279932	1	0.0134144	9.99e-05	3368758	18498400	18585940	34.0705	11.4102	PF01569	PTHR10165,PTHR10165:SF91	KOG3030	3.1.3.4	K18693	0	AT1G15080.1	ATLPP2,ATPAP2,LPP2	lipid phosphate phosphatase 2
SW_irrigated_Gene_JOINT	Phvul.006G072800	6	18553192	18557184	2	3378505_F_0_19_C_T	3368758	5.4559e-05	0.554483	0.0042327	9.99e-05	3368758	18555094	18585940	27.9582	11.3536	PF07983,PF00332	PTHR32227,PTHR32227:SF128	0	3.2.1.39	0	GO:0005975,GO:0004553	AT5G58480.1	0	O-Glycosyl hydrolases family 17 protein
SW_irrigated_Gene_JOINT	Phvul.006G072900	6	18558053	18562410	2	3378505_F_0_19_C_T	3368758	5.4559e-05	0.554483	0.0042327	9.99e-05	3368758	18555094	18585940	27.9582	11.3536	PF14259	PTHR12999,PTHR12999:SF16	0	0	K13098	0	AT5G58470.1	TAF15b	TBP-associated factor 15B
SW_irrigated_Gene_JOINT	Phvul.006G073000	6	18564133	18568348	2	3378505_F_0_19_C_T	3368758	5.4559e-05	0.554483	0.0042327	9.99e-05	3368758	18555094	18585940	27.9582	11.3536	0	PTHR37176,PTHR37176:SF1	0	0	0	0	AT1G07060.1	0	0
SW_irrigated_Gene_JOINT	Phvul.006G073100	6	18574322	18575338	2	3378505_F_0_19_C_T	3368758	5.4559e-05	0.554483	0.0042327	9.99e-05	3368758	18555094	18585940	27.9582	11.3536	PF03195	PTHR31301,PTHR31301:SF4	0	0	0	0	AT2G30130.1	ASL5,LBD12,PCK1	Lateral organ boundaries (LOB) domain family protein
SW_irrigated_Gene_JOINT	Phvul.006G073200	6	18582359	18586650	2	3378505_F_0_19_C_T	3368758	5.4559e-05	0.554483	0.0042327	9.99e-05	3368758	18555094	18585940	27.9582	11.3536	0	0	0	0	0	0	AT1G53645.1	0	hydroxyproline-rich glycoprotein family protein
SW_irrigated_Gene_JOINT	Phvul.006G073300	6	18590920	18594786	2	3378505_F_0_19_C_T	3368758	5.4559e-05	0.554483	0.0042327	9.99e-05	3368758	18555094	18585940	27.9582	11.3536	PF00698	PTHR10982	KOG2926	2.3.1.39	K00645	0	AT2G30200.1	0	catalytics;transferases;[acyl-carrier-protein] S-malonyltransferases;binding
SW_irrigated_Gene_JOINT	Phvul.006G073400	6	18594930	18595693	2	3378505_F_0_19_C_T	3368758	5.4559e-05	0.554483	0.0042327	9.99e-05	3368758	18555094	18585940	27.9582	11.3536	0	PTHR37175,PTHR37175:SF1	0	0	0	0	AT1G07020.1	0	0
SW_irrigated_Gene_JOINT	Phvul.006G073500	6	18595928	18599293	2	3378505_F_0_19_C_T	3368758	5.4559e-05	0.554483	0.0042327	9.99e-05	3368758	18555094	18585940	27.9582	11.3536	PF07228	PTHR12320,PTHR12320:SF7	KOG1379	3.1.3.16	0	GO:0003824	AT2G30170.1	0	Protein phosphatase 2C family protein
SW_irrigated_Gene_JOINT	Phvul.003G055000	3	7208624	7216120	2	8176115	8667715	8.93544e-05	0.908109	0.00617761	4.9e-05	8176115	7218384	7246969	19.7391	11.2011	PF01693,PF13456	PTHR33033,PTHR33033:SF11	0	3.1.26.4	0	0	AT1G24090.1	0	RNase H family protein
SW_irrigated_Gene_JOINT	Phvul.003G055100	3	7217143	7219582	2	8176115	8667715	8.93544e-05	0.908109	0.00617761	4.9e-05	8176115	7218384	7246969	19.7391	11.2011	0	PTHR35987,PTHR35987:SF2	0	0	0	0	AT1G10522.1	0	0
SW_irrigated_Gene_JOINT	Phvul.003G055200	3	7226235	7228378	2	8176115	8667715	8.93544e-05	0.908109	0.00617761	4.9e-05	8176115	7218384	7246969	19.7391	11.2011	PF07189	PTHR20978,PTHR20978:SF0	KOG3485	0	K12832	0	AT4G14342.1	0	Splicing factor 3B subunit 5/RDS3 complex subunit 10
SW_irrigated_Gene_JOINT	Phvul.003G055300	3	7230577	7239158	2	8176115	8667715	8.93544e-05	0.908109	0.00617761	4.9e-05	8176115	7218384	7246969	19.7391	11.2011	PF16656,PF14008,PF00149	PTHR22953,PTHR22953:SF20	KOG1378	3.1.4.1	0	GO:0016787	AT1G13750.1	0	Purple acid phosphatases superfamily protein
SW_irrigated_Gene_JOINT	Phvul.003G055400	3	7248231	7254187	2	8176115	8667715	8.93544e-05	0.908109	0.00617761	4.9e-05	8176115	7218384	7246969	19.7391	11.2011	PF00271,PF00270	PTHR24031,PTHR24031:SF210	KOG0333	3.6.4.13	0	GO:0005524,GO:0003676	AT1G59990.1	0	DEA(D/H)-box RNA helicase family protein
SW_irrigated_Gene_JOINT	Phvul.003G055500	3	7262449	7263366	2	8176115	8667715	8.93544e-05	0.908109	0.00617761	4.9e-05	8176115	7218384	7246969	19.7391	11.2011	PF02704	PTHR23201,PTHR23201:SF18	0	0	0	0	AT1G75750.1	GASA1	GAST1 protein homolog 1
SW_irrigated_Gene_JOINT	Phvul.008G012800	8	1055008	1060276	10	S08_1023332	S08_1084352	0.000162957	1	0.0090499	9.74e-06	3384367_F_0_18_T_C	1023332	1084352	72.8872	11.0663	PF00432	PTHR11774	KOG0367	2.5.1.59	K11713	GO:0003824	AT2G39550.1	ATGGT-IB,GGB,PGGT-I	Prenyltransferase family protein
SW_irrigated_Gene_JOINT	Phvul.008G012900	8	1062025	1064039	10	S08_1023332	S08_1084352	0.000162957	1	0.0090499	9.74e-06	3384367_F_0_18_T_C	1023332	1084352	72.8872	11.0663	0	PTHR34054,PTHR34054:SF3	0	0	0	0	AT5G59350.1	0	0
SW_irrigated_Gene_JOINT	Phvul.008G013000	8	1067635	1070630	10	S08_1023332	S08_1084352	0.000162957	1	0.0090499	9.74e-06	3384367_F_0_18_T_C	1023332	1084352	72.8872	11.0663	PF00012	PTHR19375,PTHR19375:SF232	0	0	K03283	0	AT5G02500.1	AT-HSC70-1,HSC70,HSC70-1,HSP70-1	heat shock cognate protein 70-1
SW_irrigated_Gene_JOINT	Phvul.006G072500	6	18528287	18529258	2	3383159_F_0_44_C_G	3378505_F_0_19_C_T	0.00104095	1	0.0313922	0.000343	3378505_F_0_19_C_T	18498400	18555094	18.9319	10.8394	PF04852	PTHR31165,PTHR31165:SF6	0	0	0	0	AT1G07090.1	LSH6	Protein of unknown function (DUF640)
SW_irrigated_Gene_JOINT	Phvul.003G068100	3	10251365	10253369	2	3381912_F_0_68_A_G	8206333_F_0_36_G_A	0.000807268	1	0.0258105	8.67e-05	3381912_F_0_68_A_G	10227479	10290791	18.8596	10.8196	PF08387	PTHR32212	0	0	0	0	AT1G61320.1	0	FBD / Leucine Rich Repeat domains containing protein
SW_irrigated_Gene_JOINT	Phvul.003G068200	3	10274628	10278334	2	3381912_F_0_68_A_G	8206333_F_0_36_G_A	0.000807268	1	0.0258105	8.67e-05	3381912_F_0_68_A_G	10227479	10290791	18.8596	10.8196	0	PTHR31312,PTHR31312:SF2	0	0	0	0	AT4G18020.3	APRR2,PRR2	CheY-like two-component responsive regulator family protein
SW_irrigated_Gene_JOINT	Phvul.011G018400	11	1467834	1470060	7	3377308_F_0_20_G_A	3381765_F_0_66_T_C	2.15689e-05	0.219205	0.00230397	4.46e-05	8207515_F_0_37_T_G	1439015	1518615	67.3475	10.7675	0	PTHR12181,PTHR12181:SF35	0	0	0	0	AT3G23255.2	0	0
SW_irrigated_Gene_JOINT	Phvul.011G018600	11	1485083	1489721	7	3377308_F_0_20_G_A	3381765_F_0_66_T_C	2.15689e-05	0.219205	0.00230397	4.46e-05	8207515_F_0_37_T_G	1439015	1518615	67.3475	10.7675	PF00642	PTHR11224,PTHR11224:SF36	0	0	K14321	GO:0046872	AT1G75340.2	0	Zinc finger C-x8-C-x5-C-x3-H type family protein
SW_irrigated_Gene_JOINT	Phvul.006G163800	6	26684719	26686970	3	3380150_F_0_68_T_A	S06_26718157	0.00206491	1	0.0465035	1.7e-05	S06_26718157	26692062	26718157	20.6971	10.7377	PF00067	PTHR24286,PTHR24286:SF0	KOG0157	0	K09832	GO:0055114,GO:0020037,GO:0016705,GO:0005506	AT2G34500.1	CYP710A1	cytochrome P450, family 710, subfamily A, polypeptide 1
SW_irrigated_Gene_JOINT	Phvul.006G163900	6	26692683	26701920	3	3380150_F_0_68_T_A	S06_26718157	0.00206491	1	0.0465035	1.7e-05	S06_26718157	26692062	26718157	20.6971	10.7377	PF00953	PTHR22926,PTHR22926:SF3	0	2.7.8.13	K01000	GO:0016021,GO:0008963	AT4G18270.1	ATTRANS11,TRANS11	translocase 11
SW_irrigated_Gene_JOINT	Phvul.006G164000	6	26704001	26708769	3	3380150_F_0_68_T_A	S06_26718157	0.00206491	1	0.0465035	1.7e-05	S06_26718157	26692062	26718157	20.6971	10.7377	PF00076,PF05383	PTHR22792,PTHR22792:SF58	KOG1855	0	K15191	GO:0003676	AT5G46250.1	0	RNA-binding protein
SW_irrigated_Gene_JOINT	Phvul.006G164100	6	26710278	26715042	3	3380150_F_0_68_T_A	S06_26718157	0.00206491	1	0.0465035	1.7e-05	S06_26718157	26692062	26718157	20.6971	10.7377	PF04862	PTHR31265,PTHR31265:SF1	0	0	0	0	AT1G29980.1	0	Protein of unknown function, DUF642
SW_irrigated_Gene_JOINT	Phvul.006G164200	6	26717778	26719484	3	3380150_F_0_68_T_A	S06_26718157	0.00206491	1	0.0465035	1.7e-05	S06_26718157	26692062	26718157	20.6971	10.7377	PF07690	PTHR23500,PTHR23500:SF144	KOG0254	0	0	GO:0055085,GO:0016021	AT1G11260.1	ATSTP1,STP1	sugar transporter 1
SW_irrigated_Gene_JOINT	Phvul.006G164300	6	26739466	26743148	3	3380150_F_0_68_T_A	S06_26718157	0.00206491	1	0.0465035	1.7e-05	S06_26718157	26692062	26718157	20.6971	10.7377	PF00027,PF07885,PF11834	PTHR10217,PTHR10217:SF520	KOG0500	0	0	0	AT5G46240.1	KAT1	potassium channel in Arabidopsis thaliana 1
SW_irrigated_Gene_JOINT	Phvul.008G110600	8	12538618	12540288	2	S08_12505741	3375008	0.00172953	1	0.0432789	0.00765125	3375008	12505741	12581866	12.773	10.7187	PF05056	PTHR33103,PTHR33103:SF4	0	0	0	0	AT5G01120.1	0	Protein of unknown function (DUF674)
SW_irrigated_Gene_JOINT	Phvul.006G121800	6	23070521	23073989	4	13121316_F_0_28_G_A	3381118_F_0_48_G_C	0.00109186	1	0.0323515	0.000336	3379201_F_0_42_T_C	23053028	23116097	25.1328	10.5609	PF02375,PF02373	PTHR10694,PTHR10694:SF33	0	1.14.11.27	K11446	0	AT5G46910.1	0	Transcription factor jumonji (jmj) family protein / zinc finger (C5HC2 type) family protein
SW_irrigated_Gene_JOINT	Phvul.006G122000	6	23076970	23077768	4	13121316_F_0_28_G_A	3381118_F_0_48_G_C	0.00109186	1	0.0323515	0.000336	3379201_F_0_42_T_C	23053028	23116097	25.1328	10.5609	PF00085	PTHR12052,PTHR12052:SF6	KOG3414	0	K12859	GO:0045454,GO:0005681,GO:0000398	AT5G08290.1	YLS8	mRNA splicing factor, thioredoxin-like U5 snRNP
SW_irrigated_Gene_JOINT	Phvul.006G122200	6	23084486	23087084	4	13121316_F_0_28_G_A	3381118_F_0_48_G_C	0.00109186	1	0.0323515	0.000336	3379201_F_0_42_T_C	23053028	23116097	25.1328	10.5609	PF09439	PTHR11711,PTHR11711:SF181	KOG0070	0	K07937	0	AT2G47170.1	ARF1A1C	Ras-related small GTP-binding family protein
SW_irrigated_Gene_JOINT	Phvul.008G036800	8	3023628	3031278	5	3370331	3378799_F_0_6_A_G	0.00218997	1	0.0483841	0.00149551	3378799_F_0_6_A_G	2978459	3053299	32.4838	10.5578	PF03556	PTHR12281	0	0	K17822	0	AT3G28970.1	AAR3	Domain of unknown function (DUF298)
SW_irrigated_Gene_JOINT	Phvul.006G121400	6	23024289	23026453	4	3369425	3381348_F_0_51_T_C	0.00144519	1	0.0384412	0.000336	3379201_F_0_42_T_C	22992558	23075700	24.9237	10.5458	PF13232	PTHR13166,PTHR13166:SF13	0	0	0	0	AT3G17300.1	0	0
SW_irrigated_Gene_JOINT	Phvul.006G121500	6	23027475	23042340	4	3369425	3381348_F_0_51_T_C	0.00144519	1	0.0384412	0.000336	3379201_F_0_42_T_C	22992558	23075700	24.9237	10.5458	PF00955	PTHR11453,PTHR11453:SF44	0	0	0	GO:0016021,GO:0006820,GO:0016020,GO:0005452	AT2G47160.1	BOR1	HCO3- transporter family
SW_irrigated_Gene_JOINT	Phvul.011G016500	11	1296967	1301088	8	13121386_F_0_12_G_A	3384426_F_0_63_C_T	0.000406424	1	0.0164561	0.00057	3378092_F_0_34_C_T	1248735	1341682	62.0986	10.5069	0	PTHR34809	0	0	0	0	AT5G17520.1	MEX1,RCP1	root cap 1 (RCP1)
SW_irrigated_Gene_JOINT	Phvul.006G073600	6	18630394	18633885	3	3368758	8214865_F_0_35_C_G	0.000567842	1	0.0200498	9.99e-05	3368758	18585940	18669022	28.5229	10.3392	PF00999	PTHR32468,PTHR32468:SF29	KOG1650	0	0	GO:0055085,GO:0016021,GO:0015299,GO:0006812	AT5G37060.1	ATCHX24,CHX24	cation/H+ exchanger 24
SW_irrigated_Gene_JOINT	Phvul.006G121600	6	23050108	23055375	3	13121316_F_0_28_G_A	3381348_F_0_51_T_C	0.000872679	1	0.0268759	0.000336	3379201_F_0_42_T_C	23053028	23075700	24.1967	10.3126	PF04146	PTHR12357,PTHR12357:SF22	KOG1901	0	0	0	AT1G48110.2	ECT7	evolutionarily conserved C-terminal region 7
SW_irrigated_Gene_JOINT	Phvul.004G020900	4	2420276	2428813	3	S04_2390659	3377694_F_0_22_C_T	6.24551e-06	0.0634731	0.00110565	2.35e-06	S04_2390659	2390659	2395217	55.4298	10.2744	PF01985	PTHR31846,PTHR31846:SF12	KOG1990	0	0	GO:0003723	AT3G01370.1	ATCFM2,CFM2	CRM family member 2
SW_irrigated_Gene_JOINT	Phvul.011G018200	11	1456692	1457868	7	8180713	3365978_F_0_48_A_G	1.13797e-05	0.115652	0.00141039	4.46e-05	8207515_F_0_37_T_G	1410128	1502531	62.2629	10.1313	PF06094	PTHR12510	KOG4450	2.3.2.4	0	0	AT3G02910.1	0	AIG2-like (avirulence induced gene) family protein
SW_irrigated_Gene_JOINT	Phvul.008G013400	8	1096710	1104972	8	3371039	3381234_F_0_53_G_A	2.91538e-05	0.29629	0.0029048	9.74e-06	3384367_F_0_18_T_C	1050429	1150143	75.2267	10.0244	PF00614,PF00168,PF12357	PTHR18896,PTHR18896:SF65	0	3.1.4.4	K01115	GO:0003824,GO:0005515	AT2G42010.1	PLDBETA,PLDBETA1	phospholipase D beta 1
SW_irrigated_Gene_JOINT	Phvul.003G009600	3	1067928	1073653	5	S03_1020642	3375785	0.000340092	1	0.0150644	0.00037	S03_1020642	1020642	1055352	31.6867	10.023	PF00365	PTHR13697,PTHR13697:SF1	0	2.7.1.90	K00895	GO:0006096,GO:0003872	AT1G76550.1	0	Phosphofructokinase family protein
SW_irrigated_Gene_JOINT	Phvul.006G162200	6	26551147	26562387	3	8208199	S06_26605246	0.000428096	1	0.0167982	0.00103326	3369744	26549485	26605246	21.4801	10.0107	PF13892,PF09110,PF04851,PF00271,PF09111	PTHR10799,PTHR10799:SF691	0	2.7.11.17	K11654	GO:0016817,GO:0043044,GO:0031491,GO:0016787,GO:0005524,GO:0003677,GO:0016818,GO:0006338,GO:0005634,GO:0003676	AT5G18620.2	CHR17	chromatin remodeling factor17
SW_irrigated_Gene_JOINT	Phvul.006G162400	6	26563378	26570068	3	8208199	S06_26605246	0.000428096	1	0.0167982	0.00103326	3369744	26549485	26605246	21.4801	10.0107	PF00069	PTHR27001,PTHR27001:SF100	KOG1187	2.7.11.1	0	GO:0006468,GO:0005524,GO:0004672	AT5G18610.1	0	Protein kinase superfamily protein
SW_irrigated_Gene_JOINT	Phvul.006G162500	6	26578675	26585314	3	8208199	S06_26605246	0.000428096	1	0.0167982	0.00103326	3369744	26549485	26605246	21.4801	10.0107	PF13812,PF01535,PF13041	PTHR24015,PTHR24015:SF856	0	0	0	0	AT3G47840.1	0	Tetratricopeptide repeat (TPR)-like superfamily protein
SW_irrigated_Gene_JOINT	Phvul.006G162600	6	26589405	26589983	3	8208199	S06_26605246	0.000428096	1	0.0167982	0.00103326	3369744	26549485	26605246	21.4801	10.0107	PF00462	PTHR10168,PTHR10168:SF105	KOG1752	1.8.1.9	K03676	GO:0045454,GO:0015035,GO:0009055	AT3G21460.1	0	Glutaredoxin family protein
SW_irrigated_Gene_JOINT	Phvul.006G162700	6	26599217	26599885	3	8208199	S06_26605246	0.000428096	1	0.0167982	0.00103326	3369744	26549485	26605246	21.4801	10.0107	PF00462	PTHR10168,PTHR10168:SF115	KOG1752	1.8.1.9	K03676	GO:0045454,GO:0015035,GO:0009055	AT5G18600.1	0	Thioredoxin superfamily protein
SW_irrigated_Gene_JOINT	Phvul.011G016300	11	1274431	1277475	7	13121386_F_0_12_G_A	3378092_F_0_34_C_T	0.00047007	1	0.0177596	0.00057	3378092_F_0_34_C_T	1248735	1324048	53.9319	9.90011	PF00083	PTHR11662,PTHR11662:SF302	KOG2533	3.6.3.20	K13783	GO:0055085,GO:0022857,GO:0016021	AT3G47420.1	ATPS3,PS3	phosphate starvation-induced gene 3
SW_irrigated_Gene_JOINT	Phvul.011G016400	11	1284806	1289452	7	13121386_F_0_12_G_A	3378092_F_0_34_C_T	0.00047007	1	0.0177596	0.00057	3378092_F_0_34_C_T	1248735	1324048	53.9319	9.90011	PF04545,PF04542,PF04539	PTHR30603,PTHR30603:SF14	0	0	K03086	GO:0016987,GO:0006355,GO:0006352,GO:0003700,GO:0003677	AT1G64860.1	RPOD1,SIG1,SIG2,SIGA,SIGB	sigma factor A
SW_irrigated_Gene_JOINT	Phvul.008G049100	8	4287455	4293277	3	8215957_F_0_11_T_C	3384309_F_0_37_G_A	0.000362586	1	0.0151023	7.36e-05	3384309_F_0_37_G_A	4275355	4340561	31.9259	9.71951	PF00076	PTHR24012,PTHR24012:SF493	KOG0117	0	0	GO:0003676	AT2G44710.1	0	RNA-binding (RRM/RBD/RNP motifs) family protein
SW_irrigated_Gene_JOINT	Phvul.008G049200	8	4295444	4300018	3	8215957_F_0_11_T_C	3384309_F_0_37_G_A	0.000362586	1	0.0151023	7.36e-05	3384309_F_0_37_G_A	4275355	4340561	31.9259	9.71951	PF00160	PTHR33344,PTHR33344:SF2	KOG0884	5.2.1.8	0	GO:0006457,GO:0003755,GO:0000413	AT4G17070.1	0	peptidyl-prolyl cis-trans isomerases
SW_irrigated_Gene_JOINT	Phvul.008G049300	8	4300945	4302616	3	8215957_F_0_11_T_C	3384309_F_0_37_G_A	0.000362586	1	0.0151023	7.36e-05	3384309_F_0_37_G_A	4275355	4340561	31.9259	9.71951	PF13837	PTHR31307,PTHR31307:SF3	KOG4282	0	0	0	AT2G44730.1	0	Alcohol dehydrogenase transcription factor Myb/SANT-like family protein
SW_irrigated_Gene_JOINT	Phvul.008G049400	8	4305508	4307212	3	8215957_F_0_11_T_C	3384309_F_0_37_G_A	0.000362586	1	0.0151023	7.36e-05	3384309_F_0_37_G_A	4275355	4340561	31.9259	9.71951	0	0	0	0	0	0	0	0	0
SW_irrigated_Gene_JOINT	Phvul.008G049500	8	4307337	4309575	3	8215957_F_0_11_T_C	3384309_F_0_37_G_A	0.000362586	1	0.0151023	7.36e-05	3384309_F_0_37_G_A	4275355	4340561	31.9259	9.71951	0	0	0	0	0	0	0	0	0
SW_irrigated_Gene_JOINT	Phvul.008G049600	8	4314808	4316683	3	8215957_F_0_11_T_C	3384309_F_0_37_G_A	0.000362586	1	0.0151023	7.36e-05	3384309_F_0_37_G_A	4275355	4340561	31.9259	9.71951	PF00134	PTHR15615,PTHR15615:SF28	KOG1674	0	0	0	AT2G44740.1	CYCP4;1	cyclin p4;1
SW_irrigated_Gene_JOINT	Phvul.008G049700	8	4322436	4323111	3	8215957_F_0_11_T_C	3384309_F_0_37_G_A	0.000362586	1	0.0151023	7.36e-05	3384309_F_0_37_G_A	4275355	4340561	31.9259	9.71951	PF13962	PTHR24177,PTHR24177:SF14	0	0	0	0	AT5G51160.1	0	Ankyrin repeat family protein
SW_irrigated_Gene_JOINT	Phvul.011G018000	11	1438870	1441943	4	8180713	8212518	0.000191907	1	0.0100534	0.000463	8212518_F_0_5_G_C	1410128	1439066	39.3178	9.65749	PF00107,PF08240	PTHR11695,PTHR11695:SF538	KOG0022	1.1.1.1	K00121	GO:0055114,GO:0016491,GO:0008270	AT1G22430.1	0	GroES-like zinc-binding dehydrogenase family protein
SW_irrigated_Gene_JOINT	Phvul.008G050200	8	4365876	4369035	4	3384309_F_0_37_G_A	3367529	1.55957e-06	0.0158499	0.000511287	1.42e-07	3367529	4340561	4396716	71.2399	9.5407	0	PTHR12655,PTHR12655:SF3	KOG2763	3.1.2.2,3.1.2.20	K17361	0	AT5G48370.1	0	Thioesterase/thiol ester dehydrase-isomerase superfamily protein
SW_irrigated_Gene_JOINT	Phvul.008G050300	8	4369724	4373937	4	3384309_F_0_37_G_A	3367529	1.55957e-06	0.0158499	0.000511287	1.42e-07	3367529	4340561	4396716	71.2399	9.5407	PF02181	PTHR23213,PTHR23213:SF220	0	0	0	0	AT3G25500.1	AFH1,AHF1,ATFH1,FH1	formin homology 1
SW_irrigated_Gene_JOINT	Phvul.008G050400	8	4378532	4381759	4	3384309_F_0_37_G_A	3367529	1.55957e-06	0.0158499	0.000511287	1.42e-07	3367529	4340561	4396716	71.2399	9.5407	0	PTHR11177,PTHR11177:SF167	0	0	0	0	AT3G25480.1	0	Rhodanese/Cell cycle control phosphatase superfamily protein
SW_irrigated_Gene_JOINT	Phvul.008G050500	8	4382984	4387333	4	3384309_F_0_37_G_A	3367529	1.55957e-06	0.0158499	0.000511287	1.42e-07	3367529	4340561	4396716	71.2399	9.5407	PF08631	PTHR31791,PTHR31791:SF8	0	0	0	GO:0051321	AT5G48390.1	ATZIP4	Tetratricopeptide repeat (TPR)-like superfamily protein
SW_irrigated_Gene_JOINT	Phvul.009G250200	9	37096687	37104325	2	8215492_F_0_33_C_T	3374349	0.00034097	1	0.0150644	0.00246588	8215492_F_0_33_C_T	37065994	37141038	16.5705	9.33922	PF00630	PTHR38537	0	0	0	0	AT5G49150.1	ATGEX2,GEX2	gamete expressed 2
SW_irrigated_Gene_JOINT	Phvul.009G250300	9	37106722	37107828	2	8215492_F_0_33_C_T	3374349	0.00034097	1	0.0150644	0.00246588	8215492_F_0_33_C_T	37065994	37141038	16.5705	9.33922	0	PTHR35488,PTHR35488:SF2	0	0	0	0	AT3G06840.1	0	0
SW_irrigated_Gene_JOINT	Phvul.009G250400	9	37110435	37111764	2	8215492_F_0_33_C_T	3374349	0.00034097	1	0.0150644	0.00246588	8215492_F_0_33_C_T	37065994	37141038	16.5705	9.33922	PF13639	PTHR14155,PTHR14155:SF99	0	0	K19041	GO:0008270,GO:0005515	AT3G16720.1	ATL2,TL2	TOXICOS EN LEVADURA 2
SW_irrigated_Gene_JOINT	Phvul.009G250500	9	37113420	37117969	2	8215492_F_0_33_C_T	3374349	0.00034097	1	0.0150644	0.00246588	8215492_F_0_33_C_T	37065994	37141038	16.5705	9.33922	PF16869,PF06278,PF16858	PTHR14324,PTHR14324:SF3	KOG2359	0	K11490	0	AT3G16730.1	0	0
SW_irrigated_Gene_JOINT	Phvul.011G016600	11	1305049	1313482	6	S11_1274504	3384426_F_0_63_C_T	0.000495737	1	0.0182806	0.00057	3378092_F_0_34_C_T	1274504	1341682	45.2146	9.29018	PF14370,PF01028,PF02919	PTHR10290,PTHR10290:SF3	0	5.99.1.2	K03163	GO:0006265,GO:0003918,GO:0003677,GO:0005694,GO:0003917	AT5G55310.1	TOP1,TOP1BETA	DNA topoisomerase 1 beta
SW_irrigated_Gene_JOINT	Phvul.011G016700	11	1315324	1317026	6	S11_1274504	3384426_F_0_63_C_T	0.000495737	1	0.0182806	0.00057	3378092_F_0_34_C_T	1274504	1341682	45.2146	9.29018	PF00067	PTHR24298,PTHR24298:SF45	KOG0156	0	0	GO:0055114,GO:0020037,GO:0016705,GO:0005506	AT1G64940.1	CYP89A6	cytochrome P450, family 87, subfamily A, polypeptide 6
SW_irrigated_Gene_JOINT	Phvul.011G016800	11	1317312	1320809	6	S11_1274504	3384426_F_0_63_C_T	0.000495737	1	0.0182806	0.00057	3378092_F_0_34_C_T	1274504	1341682	45.2146	9.29018	PF00561	PTHR10794	KOG1838	2.3.1.84	0	0	AT3G50790.1	0	esterase/lipase/thioesterase family protein
SW_irrigated_Gene_JOINT	Phvul.011G016900	11	1322365	1327478	6	S11_1274504	3384426_F_0_63_C_T	0.000495737	1	0.0182806	0.00057	3378092_F_0_34_C_T	1274504	1341682	45.2146	9.29018	PF15249	PTHR15572	0	0	0	0	AT5G17510.1	0	0
SW_irrigated_Gene_JOINT	Phvul.008G048700	8	4260165	4260982	2	8215957_F_0_11_T_C	3372525	0.00200611	1	0.0463366	0.00017	3372525	4275355	4308591	16.21	9.27976	PF03208	PTHR19317,PTHR19317:SF15	0	0	0	0	AT1G55190.1	PRA1.F2,PRA7	PRA1 (Prenylated rab acceptor) family protein
SW_irrigated_Gene_JOINT	Phvul.008G048800	8	4261582	4266344	2	8215957_F_0_11_T_C	3372525	0.00200611	1	0.0463366	0.00017	3372525	4275355	4308591	16.21	9.27976	PF01713,PF08590	PTHR13308	KOG2401	0	0	0	AT5G23520.1	0	smr (Small MutS Related) domain-containing protein
SW_irrigated_Gene_JOINT	Phvul.008G048900	8	4270236	4275646	2	8215957_F_0_11_T_C	3372525	0.00200611	1	0.0463366	0.00017	3372525	4275355	4308591	16.21	9.27976	PF03416	PTHR22624,PTHR22624:SF34	KOG2674	0	K08342	0	AT2G44140.1	0	Peptidase family C54 protein
SW_irrigated_Gene_JOINT	Phvul.008G049000	8	4277832	4285212	2	8215957_F_0_11_T_C	3372525	0.00200611	1	0.0463366	0.00017	3372525	4275355	4308591	16.21	9.27976	PF00793	PTHR21057,PTHR21057:SF2	0	2.5.1.55	K01627	GO:0009058,GO:0008676,GO:0008152,GO:0005737	AT1G79500.4	AtkdsA1	Aldolase-type TIM barrel family protein
SW_irrigated_Gene_JOINT	Phvul.006G162800	6	26604084	26611606	2	3369744	S06_26605246	0.00122455	1	0.034284	0.00103326	3369744	26589485	26605246	16.7584	9.23636	PF01344,PF13418	PTHR23244,PTHR23244:SF308	KOG0379	0	0	GO:0005515	AT5G18590.1	0	Galactose oxidase/kelch repeat superfamily protein
SW_irrigated_Gene_JOINT	Phvul.006G162900	6	26612474	26619834	2	3369744	S06_26605246	0.00122455	1	0.034284	0.00103326	3369744	26589485	26605246	16.7584	9.23636	PF13176,PF13181,PF07719	PTHR12558,PTHR12558:SF8	KOG1174	0	K03354	GO:0005515	AT2G39090.1	0	tetratricopeptide repeat (TPR)-containing protein
SW_irrigated_Gene_JOINT	Phvul.006G163000	6	26621058	26625429	2	3369744	S06_26605246	0.00122455	1	0.034284	0.00103326	3369744	26589485	26605246	16.7584	9.23636	PF09269,PF01926,PF01018	PTHR11702,PTHR11702:SF20	KOG1489	0	0	GO:0000166,GO:0005525	AT5G18570.1	ATOBGC,CPSAR1,EMB269	GTP1/OBG family protein
SW_irrigated_Gene_JOINT	Phvul.006G163100	6	26630637	26631587	2	3369744	S06_26605246	0.00122455	1	0.034284	0.00103326	3369744	26589485	26605246	16.7584	9.23636	PF00847	PTHR31677,PTHR31677:SF22	0	0	0	GO:0006355,GO:0003700	AT5G18560.1	PUCHI	Integrase-type DNA-binding superfamily protein
SW_irrigated_Gene_JOINT	Phvul.006G163200	6	26633749	26634755	2	3369744	S06_26605246	0.00122455	1	0.034284	0.00103326	3369744	26589485	26605246	16.7584	9.23636	0	0	0	0	0	0	0	0	0
SW_irrigated_Gene_JOINT	Phvul.010G127200	10	40797513	40799512	3	3382802_F_0_10_A_T	8212450	0.00178774	1	0.0433017	0.0002	8212450	40761971	40846175	19.8527	9.14904	PF05158	PTHR12780,PTHR12780:SF1	KOG3233	0	K03025	GO:0006351,GO:0003899,GO:0003677	AT5G23710.1	0	DNA binding;DNA-directed RNA polymerases
SW_irrigated_Gene_JOINT	Phvul.010G127300	10	40800656	40807928	3	3382802_F_0_10_A_T	8212450	0.00178774	1	0.0433017	0.0002	8212450	40761971	40846175	19.8527	9.14904	PF00076	PTHR24012,PTHR24012:SF379	KOG0148	0	K13201	GO:0003676	AT1G17370.1	UBP1B	oligouridylate binding protein 1B
SW_irrigated_Gene_JOINT	Phvul.008G049800	8	4326991	4329189	2	3372525	3384309_F_0_37_G_A	4.56371e-05	0.46381	0.00417847	7.36e-05	3384309_F_0_37_G_A	4308591	4340561	29.8526	9.05245	PF06916	PTHR21377,PTHR21377:SF2	KOG4526	0	0	0	AT2G20940.1	0	Protein of unknown function (DUF1279)
SW_irrigated_Gene_JOINT	Phvul.008G049900	8	4330922	4333660	2	3372525	3384309_F_0_37_G_A	4.56371e-05	0.46381	0.00417847	7.36e-05	3384309_F_0_37_G_A	4308591	4340561	29.8526	9.05245	PF04099	PTHR12403	KOG3444	0	0	GO:0006888,GO:0005801,GO:0005622	AT2G20930.1	0	SNARE-like superfamily protein
SW_irrigated_Gene_JOINT	Phvul.006G164400	6	26743188	26747561	2	3375746	S06_26718157	0.000904958	1	0.0277858	1.7e-05	S06_26718157	26693496	26718157	18.5474	8.95861	PF01532	PTHR11742,PTHR11742:SF7	0	3.2.1.113	K01230	GO:0016020,GO:0005509,GO:0004571	AT1G30000.1	MNS3	alpha-mannosidase 3
SW_irrigated_Gene_JOINT	Phvul.008G011900	8	994447	997151	8	3380418_F_0_33_C_T	8206561_F_0_44_T_A	0.00203346	1	0.0465035	0.000147	8216048_F_0_53_G_T	971140	1046075	40.9553	8.95598	PF00012	PTHR19375,PTHR19375:SF227	0	0	K03283	0	AT3G12580.1	ATHSP70,HSP70	heat shock protein 70
SW_irrigated_Gene_JOINT	Phvul.008G050800	8	4410316	4412629	3	3381402_F_0_44_A_T	3367529	7.15246e-07	0.00726905	0.000346145	1.42e-07	3367529	4385193	4396716	55.5239	8.75954	PF00034	PTHR11961,PTHR11961:SF8	KOG3453	0	K08738	GO:0020037,GO:0009055	AT1G22840.1	ATCYTC-A,CYTC-1	CYTOCHROME C-1
SW_irrigated_Gene_JOINT	Phvul.008G013100	8	1079744	1083901	8	3382455_F_0_6_C_T	S08_1084352	0.000113365	1	0.00724609	9.74e-06	3384367_F_0_18_T_C	1045601	1084352	70.4645	8.68281	0	PTHR31096,PTHR31096:SF4	0	2.7.7.59	0	0	AT2G39570.1	0	ACT domain-containing protein
SW_irrigated_Gene_JOINT	Phvul.008G013200	8	1084327	1085244	8	3382455_F_0_6_C_T	S08_1084352	0.000113365	1	0.00724609	9.74e-06	3384367_F_0_18_T_C	1045601	1084352	70.4645	8.68281	PF00378	PTHR11941,PTHR11941:SF84	0	0	0	GO:0008152,GO:0003824	AT1G65520.1	ATECI1,ECHIC,ECI1,PEC11	delta(3), delta(2)-enoyl CoA isomerase 1
SW_irrigated_Gene_JOINT	Phvul.008G013300	8	1090400	1093853	8	3382455_F_0_6_C_T	S08_1084352	0.000113365	1	0.00724609	9.74e-06	3384367_F_0_18_T_C	1045601	1084352	70.4645	8.68281	PF05922,PF02225,PF00082	PTHR10795,PTHR10795:SF387	0	3.4.21.25	0	GO:0006508,GO:0004252	AT1G01900.1	ATSBT1.1,SBTI1.1	subtilase family protein
SW_irrigated_Gene_JOINT	Phvul.002G239200	2	41098105	41102067	4	3369200	S02_41147216	0.00144169	1	0.0384412	0.00103149	S02_41147216	41060437	41147216	24.6505	8.59604	PF05097	PTHR33671,PTHR33671:SF3	0	0	0	0	AT2G30990.2	0	Protein of unknown function (DUF688)
SW_irrigated_Gene_JOINT	Phvul.002G239300	2	41104915	41106840	4	3369200	S02_41147216	0.00144169	1	0.0384412	0.00103149	S02_41147216	41060437	41147216	24.6505	8.59604	PF08246,PF00112	PTHR12411,PTHR12411:SF371	KOG1542	3.4.22.14	0	GO:0008234,GO:0006508	AT5G43060.1	0	Granulin repeat cysteine protease family protein
SW_irrigated_Gene_JOINT	Phvul.011G209400	11	52788550	52791464	3	3383169_F_0_51_A_G	8199379_F_0_62_T_G	5.7639e-06	0.0585785	0.00110526	2.18e-08	3383169_F_0_51_A_G	52773784	52829975	33.2777	8.32825	PF00191	PTHR10502,PTHR10502:SF104	KOG0819	0	K17099	GO:0005544,GO:0005509	AT2G38750.1	ANNAT4	annexin 4
SW_irrigated_Gene_JOINT	Phvul.008G013500	8	1108673	1127251	6	S08_1060137	3381234_F_0_53_G_A	0.000136773	1	0.0077932	0.00011	3366878	1060137	1150143	54.7637	8.13899	0	PTHR34958,PTHR34958:SF1	0	0	0	0	AT3G12590.1	0	0
SW_irrigated_Gene_JOINT	Phvul.011G209700	11	52766583	52767630	2	3383169_F_0_51_A_G	3367385_F_0_59_C_T	6.78726e-07	0.00689789	0.000346145	2.18e-08	3383169_F_0_51_A_G	52773784	52815574	31.6171	8.0814	0	0	0	0	0	0	0	0	0
SW_irrigated_Gene_JOINT	Phvul.008G010900	8	948522	951406	5	3383034_F_0_53_G_T	S08_1000138	0.000791518	1	0.0258105	0.000147	8216048_F_0_53_G_T	927259	1000138	30.5232	7.86106	PF01417	PTHR12276,PTHR12276:SF10	0	0	0	0	AT3G46540.1	0	ENTH/VHS family protein
SW_irrigated_Gene_JOINT	Phvul.008G011000	8	952993	956614	5	3383034_F_0_53_G_T	S08_1000138	0.000791518	1	0.0258105	0.000147	8216048_F_0_53_G_T	927259	1000138	30.5232	7.86106	PF00022	PTHR11937,PTHR11937:SF255	0	0	K10355	0	AT3G12110.1	ACT11	actin-11
SW_irrigated_Gene_JOINT	Phvul.008G011100	8	961203	962043	5	3383034_F_0_53_G_T	S08_1000138	0.000791518	1	0.0258105	0.000147	8216048_F_0_53_G_T	927259	1000138	30.5232	7.86106	PF03140	PTHR31549,PTHR31549:SF23	0	0	0	0	AT3G02645.1	0	Plant protein of unknown function (DUF247)
SW_irrigated_Gene_JOINT	Phvul.008G011200	8	962117	965115	5	3383034_F_0_53_G_T	S08_1000138	0.000791518	1	0.0258105	0.000147	8216048_F_0_53_G_T	927259	1000138	30.5232	7.86106	PF14990	PTHR28492,PTHR28492:SF1	0	0	0	0	AT4G26055.1	0	0
SW_irrigated_Gene_JOINT	Phvul.008G011300	8	968455	970364	5	3383034_F_0_53_G_T	S08_1000138	0.000791518	1	0.0258105	0.000147	8216048_F_0_53_G_T	927259	1000138	30.5232	7.86106	PF00012	PTHR19375,PTHR19375:SF227	0	0	K03283	0	AT3G12580.1	ATHSP70,HSP70	heat shock protein 70
SW_irrigated_Gene_JOINT	Phvul.011G176500	11	48728040	48733070	3	3374411	3373763	0.00161176	1	0.0413644	0.000215	3374411	48746361	48779423	20.9648	7.85052	PF00400	PTHR19861,PTHR19861:SF3	KOG1446	0	K14962	GO:0005515	AT5G66240.2	0	Transducin/WD40 repeat-like superfamily protein
SW_irrigated_Gene_JOINT	Phvul.008G011600	8	978659	981364	6	3380418_F_0_33_C_T	S08_1023430	0.00226745	1	0.0492395	0.000147	8216048_F_0_53_G_T	971140	1023430	32.0852	7.81274	PF00012	PTHR19375,PTHR19375:SF227	0	0	K03283	0	AT3G12580.1	ATHSP70,HSP70	heat shock protein 70
SW_irrigated_Gene_JOINT	Phvul.008G011700	8	989350	990146	6	3380418_F_0_33_C_T	S08_1023430	0.00226745	1	0.0492395	0.000147	8216048_F_0_53_G_T	971140	1023430	32.0852	7.81274	PF00083	PTHR23500,PTHR23500:SF149	0	0	0	GO:0055085,GO:0022857,GO:0016021	AT2G35740.1	ATINT3,INT3	nositol transporter 3
SW_irrigated_Gene_JOINT	Phvul.008G011800	8	991152	992738	6	3380418_F_0_33_C_T	S08_1023430	0.00226745	1	0.0492395	0.000147	8216048_F_0_53_G_T	971140	1023430	32.0852	7.81274	PF03107	PTHR13871,PTHR13871:SF40	0	0	0	0	AT2G16050.1	0	Cysteine/Histidine-rich C1 domain family protein
SW_irrigated_Gene_JOINT	Phvul.010G127400	10	40814638	40817051	2	3368993	8212450	0.000809086	1	0.0258105	0.0002	8212450	40803827	40846175	14.5034	7.64376	PF09425,PF06200	PTHR33077,PTHR33077:SF13	0	0	K13464	0	AT1G72450.1	JAZ6,TIFY11B	jasmonate-zim-domain protein 6
SW_irrigated_Gene_JOINT	Phvul.010G127500	10	40831320	40834127	2	3368993	8212450	0.000809086	1	0.0258105	0.0002	8212450	40803827	40846175	14.5034	7.64376	PF08263,PF00560,PF13855,PF07714	PTHR27008,PTHR27008:SF16	KOG1187	2.7.11.1	0	GO:0005515,GO:0006468,GO:0004672	AT3G42880.1	0	Leucine-rich repeat protein kinase family protein
SW_irrigated_Gene_JOINT	Phvul.010G127600	10	40839695	40842231	2	3368993	8212450	0.000809086	1	0.0258105	0.0002	8212450	40803827	40846175	14.5034	7.64376	PF03081	PTHR12542,PTHR12542:SF27	0	0	K07195	GO:0006887,GO:0000145	AT1G72470.1	ATEXO70D1,EXO70D1	exocyst subunit exo70 family protein D1
SW_irrigated_Gene_JOINT	Phvul.010G127700	10	40843901	40847497	2	3368993	8212450	0.000809086	1	0.0258105	0.0002	8212450	40803827	40846175	14.5034	7.64376	PF06814	PTHR21229,PTHR21229:SF15	0	0	0	GO:0016021	AT1G72480.1	0	Lung seven transmembrane receptor family protein
SW_irrigated_Gene_JOINT	Phvul.002G239400	2	41114369	41117582	3	3376856_F_0_9_G_C	S02_41147216	0.00209018	1	0.0466868	0.00103149	S02_41147216	41105020	41147216	18.4129	7.47875	PF13855,PF07714	PTHR27000,PTHR27000:SF154	KOG1187	2.7.11.1	0	GO:0005515,GO:0006468,GO:0004672	AT5G45800.1	MEE62	Leucine-rich repeat protein kinase family protein
SW_irrigated_Gene_JOINT	Phvul.002G239500	2	41146070	41149960	3	3376856_F_0_9_G_C	S02_41147216	0.00209018	1	0.0466868	0.00103149	S02_41147216	41105020	41147216	18.4129	7.47875	PF00860	PTHR11119,PTHR11119:SF47	0	0	K14611	GO:0055085,GO:0016020,GO:0006810,GO:0005215	AT2G34190.1	0	Xanthine/uracil permease family protein
SW_irrigated_Gene_JOINT	Phvul.008G010800	8	942129	947319	4	3383034_F_0_53_G_T	8216048_F_0_53_G_T	0.000657351	1	0.0225698	0.000147	8216048_F_0_53_G_T	927259	996020	29.8412	7.21162	PF00535	PTHR10859,PTHR10859:SF91	KOG2977	2.4.1.117	K00729	0	AT2G39630.1	0	Nucleotide-diphospho-sugar transferases superfamily protein
SW_irrigated_Gene_JOINT	Phvul.002G205600	2	37214317	37217807	4	S02_37216371	8208234	0.000864984	1	0.0267199	7.25e-05	S02_37216372	37216371	37264336	36.474	6.98488	PF01170	PTHR13370,PTHR13370:SF3	0	2.1.1.214	K15430	0	AT3G26410.1	0	methyltransferases;nucleic acid binding
SW_irrigated_Gene_JOINT	Phvul.002G205800	2	37242819	37247840	4	S02_37216371	8208234	0.000864984	1	0.0267199	7.25e-05	S02_37216372	37216371	37264336	36.474	6.98488	PF03730,PF03731,PF08785,PF02735	PTHR12604,PTHR12604:SF4	KOG2326	3.6.4.12	K10885	GO:0006303,GO:0004003,GO:0003677,GO:0016817	AT1G48050.1	ATKU80,KU80	Ku80 family protein
SW_irrigated_Gene_JOINT	Phvul.002G205900	2	37251779	37252184	4	S02_37216371	8208234	0.000864984	1	0.0267199	7.25e-05	S02_37216372	37216371	37264336	36.474	6.98488	0	0	0	0	0	0	AT4G14276.1	0	Defensin-like (DEFL) family protein
SW_irrigated_Gene_JOINT	Phvul.002G206100	2	37260034	37261026	4	S02_37216371	8208234	0.000864984	1	0.0267199	7.25e-05	S02_37216372	37216371	37264336	36.474	6.98488	PF00935	PTHR10369,PTHR10369:SF3	KOG3464	0	K02929	GO:0006412,GO:0005840,GO:0005622,GO:0003735	AT4G14320.1	0	Zinc-binding ribosomal protein family protein
SW_irrigated_Gene_JOINT	Phvul.002G206200	2	37261478	37265193	4	S02_37216371	8208234	0.000864984	1	0.0267199	7.25e-05	S02_37216372	37216371	37264336	36.474	6.98488	PF00153	PTHR24089,PTHR24089:SF35	KOG0758	0	0	0	AT4G15010.1	0	Mitochondrial substrate carrier family protein
SW_irrigated_Gene_JOINT	Phvul.011G176400	11	48719433	48722696	2	3374411	3372995	0.000832668	1	0.0263626	0.000215	3374411	48746361	48756593	20.596	6.57614	PF07714	PTHR27002,PTHR27002:SF116	KOG1187	2.7.11.1	0	GO:0006468,GO:0004672	AT3G16030.1	CES101	lectin protein kinase family protein
SW_irrigated_Gene_JOINT	Phvul.001G040700	1	4336106	4338606	2	S01_4370407	S01_4370440	0.000412802	1	0.016517	6.66e-05	S01_4370407	4370407	4370440	16.0927	6.52651	PF00069,PF00139	PTHR27007,PTHR27007:SF24	KOG1187	2.7.11.1	0	GO:0006468,GO:0005524,GO:0004672,GO:0030246	AT5G10530.1	0	Concanavalin A-like lectin protein kinase family protein
SW_irrigated_Gene_JOINT	Phvul.001G040800	1	4327634	4329496	2	S01_4370407	S01_4370440	0.000412802	1	0.016517	6.66e-05	S01_4370407	4370407	4370440	16.0927	6.52651	PF00069,PF00139	PTHR27007,PTHR27007:SF24	KOG1187	2.7.11.1	0	GO:0006468,GO:0005524,GO:0004672,GO:0030246	AT5G10530.1	0	Concanavalin A-like lectin protein kinase family protein
SW_irrigated_Gene_JOINT	Phvul.006G131200	6	23967509	23971272	5	8216263_F_0_57_A_C	3370835_F_0_11_C_T	0.00119709	1	0.034284	0.000334	S06_23998762	23928852	24001164	35.7925	6.50402	0	PTHR31755,PTHR31755:SF1	0	0	0	0	AT1G36320.1	0	0
SW_irrigated_Gene_JOINT	Phvul.006G131400	6	23977467	23982238	5	8216263_F_0_57_A_C	3370835_F_0_11_C_T	0.00119709	1	0.034284	0.000334	S06_23998762	23928852	24001164	35.7925	6.50402	PF11900,PF00651,PF12313	PTHR24413,PTHR24413:SF124	0	0	K14508	GO:0005515	AT5G45110.1	ATNPR3,NPR3	NPR1-like protein 3
SW_irrigated_Gene_JOINT	Phvul.008G020301	8	1688528	1689180	2	S08_1679636	8178940	0.0013246	1	0.0365813	0.000248	S08_1679636	1679636	1738280	13.9933	6.20846	PF08137	PTHR33102,PTHR33102:SF6	0	0	0	0	AT1G67265.1	DVL3,RTFL21	ROTUNDIFOLIA like 21
SW_irrigated_Gene_JOINT	Phvul.006G077500	6	18932759	18944893	2	3380824_F_0_8_T_A	S06_18929309	0.00182523	1	0.0433017	0.00110732	S06_18929309	18919916	18929309	18.6016	5.83919	PF05193,PF00675,PF16187	PTHR11851,PTHR11851:SF123	0	3.4.24.56	K01411	0	AT1G06900.1	0	Insulinase (Peptidase family M16) family protein
SW_irrigated_Gene_JOINT	Phvul.006G077600	6	18938783	18939396	2	3380824_F_0_8_T_A	S06_18929309	0.00182523	1	0.0433017	0.00110732	S06_18929309	18919916	18929309	18.6016	5.83919	0	PTHR34222,PTHR34222:SF2	0	0	0	0	0	0	0
SW_irrigated_Gene_JOINT	Phvul.006G077700	6	18950426	18951426	2	3380824_F_0_8_T_A	S06_18929309	0.00182523	1	0.0433017	0.00110732	S06_18929309	18919916	18929309	18.6016	5.83919	PF00319	PTHR11945,PTHR11945:SF183	KOG0014	0	0	GO:0046983,GO:0003677	AT5G48670.1	AGL80,FEM111	AGAMOUS-like 80
SW_irrigated_Gene_JOINT	Phvul.006G077800	6	18958456	18959303	2	3380824_F_0_8_T_A	S06_18929309	0.00182523	1	0.0433017	0.00110732	S06_18929309	18919916	18929309	18.6016	5.83919	PF00319	PTHR11945,PTHR11945:SF153	0	0	0	GO:0046983,GO:0003677	AT1G65300.1	AGL38,PHE2	AGAMOUS-like 38
SW_irrigated_Gene_JOINT	Phvul.009G242700	9	36364660	36371118	2	8176472	S09_36414538	0.000183564	1	0.00966612	8.05e-05	8176472	36375757	36414538	23.9173	5.76664	PF13632,PF14569	PTHR13301,PTHR13301:SF59	0	2.4.1.12	K10999	0	AT5G44030.1	CESA4,IRX5,NWS2	cellulose synthase A4
SW_irrigated_Gene_JOINT	Phvul.009G242800	9	36373944	36376606	2	8176472	S09_36414538	0.000183564	1	0.00966612	8.05e-05	8176472	36375757	36414538	23.9173	5.76664	PF12708	PTHR33928,PTHR33928:SF2	0	3.2.1.15	0	0	AT4G20050.1	QRT3	Pectin lyase-like superfamily protein
SW_irrigated_Gene_JOINT	Phvul.009G242900	9	36397049	36401655	2	8176472	S09_36414538	0.000183564	1	0.00966612	8.05e-05	8176472	36375757	36414538	23.9173	5.76664	PF07687,PF01546	PTHR32494,PTHR32494:SF7	0	3.5.3.9	K02083	GO:0016787,GO:0008152	AT4G20070.1	AAH,ATAAH	allantoate amidohydrolase
SW_irrigated_Gene_JOINT	Phvul.009G243000	9	36410742	36414587	2	8176472	S09_36414538	0.000183564	1	0.00966612	8.05e-05	8176472	36375757	36414538	23.9173	5.76664	PF13419	PTHR12725,PTHR12725:SF61	KOG3085	0	0	0	AT5G44730.2	0	Haloacid dehalogenase-like hydrolase (HAD) superfamily protein
SW_irrigated_Gene_JOINT	Phvul.009G243100	9	36417162	36418937	2	8176472	S09_36414538	0.000183564	1	0.00966612	8.05e-05	8176472	36375757	36414538	23.9173	5.76664	PF13906,PF00324	PTHR11785,PTHR11785:SF267	KOG1286	0	0	GO:0055085,GO:0016020,GO:0006810,GO:0015171,GO:0003333	AT2G34960.1	CAT5	cationic amino acid transporter 5
SW_irrigated_Gene_JOINT	Phvul.009G243200	9	36420275	36423390	2	8176472	S09_36414538	0.000183564	1	0.00966612	8.05e-05	8176472	36375757	36414538	23.9173	5.76664	PF03473,PF03476	PTHR14237,PTHR14237:SF30	KOG2362	2.8.1.9	0	GO:0030170,GO:0030151,GO:0003824	AT1G30910.1	0	Molybdenum cofactor sulfurase family protein
SW_irrigated_Gene_JOINT	Phvul.008G034000	8	2775270	2777247	5	S08_2729368	3372452_F_0_11_A_C	0.000731748	1	0.0247892	0.000475	S08_2729368	2729368	2819724	34.0101	5.67468	PF00201	PTHR11926,PTHR11926:SF265	0	2.4.1.85	0	GO:0016758,GO:0008152	AT3G02100.1	0	UDP-Glycosyltransferase superfamily protein
SW_irrigated_Gene_JOINT	Phvul.008G013600	8	1128102	1130707	5	3366878	3381234_F_0_53_G_A	0.00020664	1	0.0106864	0.00011	3366878	1080414	1150143	41.3059	5.53859	PF00076	PTHR19965,PTHR19965:SF33	KOG0533	0	K12881	GO:0003676	AT5G02530.1	0	RNA-binding (RRM/RBD/RNP motifs) family protein
SW_irrigated_Gene_JOINT	Phvul.006G131800	6	24008927	24011801	6	8212321	18322599_F_0_53_A_G	0.00130453	1	0.0361252	0.000334	S06_23998762	23985335	24050322	38.0421	5.49114	PF10250	PTHR37220,PTHR37220:SF1	0	2.4.1.221	0	0	AT3G05320.1	0	O-fucosyltransferase family protein
SW_irrigated_Gene_JOINT	Phvul.008G021100	8	1769720	1771906	8	8178940	3374483	0.000568519	1	0.0200498	6.72e-05	3374483	1738280	1818045	59.9696	5.48723	PF14416,PF13839	PTHR32285,PTHR32285:SF13	0	0	0	0	AT5G15900.1	TBL19	TRICHOME BIREFRINGENCE-LIKE 19
SW_irrigated_Gene_JOINT	Phvul.008G021200	8	1777460	1782534	8	8178940	3374483	0.000568519	1	0.0200498	6.72e-05	3374483	1738280	1818045	59.9696	5.48723	PF14416,PF13839	PTHR32285,PTHR32285:SF48	0	0	0	0	AT5G15900.1	TBL19	TRICHOME BIREFRINGENCE-LIKE 19
SW_irrigated_Gene_JOINT	Phvul.008G021300	8	1790014	1790672	7	3372681	3374483	0.000496584	1	0.0182806	6.72e-05	3374483	1746035	1818045	59.4036	5.37735	0	PTHR34563,PTHR34563:SF1	0	0	0	0	AT3G19660.1	0	0
SW_irrigated_Gene_JOINT	Phvul.008G021400	8	1797269	1803893	6	3373735	3374483	0.000344413	1	0.0150644	6.72e-05	3374483	1756528	1818045	57.6429	4.43522	0	PTHR33405,PTHR33405:SF5	0	0	0	0	AT1G67170.1	0	0
SW_irrigated_Gene_JOINT	Phvul.008G021500	8	1804913	1814885	6	3373735	3374483	0.000344413	1	0.0150644	6.72e-05	3374483	1756528	1818045	57.6429	4.43522	PF13371,PF14559,PF12895,PF07719	PTHR12558,PTHR12558:SF13	0	0	K03350	0	AT2G20000.1	CDC27b,HBT	CDC27 family protein
SW_irrigated_Gene_JOINT	Phvul.008G021600	8	1816790	1821446	5	3374387	3374483	0.000349817	1	0.0150644	6.72e-05	3374483	1795777	1818045	53.9357	4.28781	PF01676,PF10143	PTHR31209,PTHR31209:SF0	0	5.4.2.12	0	GO:0046872,GO:0003824,GO:0046537	AT3G30841.1	0	Cofactor-independent phosphoglycerate mutase
SW_irrigated_Gene_JOINT	Phvul.008G021700	8	1822247	1824819	5	3374387	3374483	0.000349817	1	0.0150644	6.72e-05	3374483	1795777	1818045	53.9357	4.28781	PF05158	PTHR12780,PTHR12780:SF1	KOG3233	0	K03025	GO:0006351,GO:0003899,GO:0003677	AT5G23710.1	0	DNA binding;DNA-directed RNA polymerases
SW_irrigated_Gene_JOINT	Phvul.008G021800	8	1825994	1826797	5	3374387	3374483	0.000349817	1	0.0150644	6.72e-05	3374483	1795777	1818045	53.9357	4.28781	0	PTHR34191,PTHR34191:SF2	0	0	0	0	AT5G38760.1	0	Late embryogenesis abundant protein (LEA) family protein
SW_irrigated_Gene_JOINT	Phvul.008G021900	8	1828675	1831950	5	3374387	3374483	0.000349817	1	0.0150644	6.72e-05	3374483	1795777	1818045	53.9357	4.28781	PF03878	PTHR14083,PTHR14083:SF5	KOG3094	0	0	0	AT1G30890.2	0	Integral membrane HRF1 family protein
SW_irrigated_Gene_JOINT	Phvul.008G022000	8	1835499	1838504	5	3374387	3374483	0.000349817	1	0.0150644	6.72e-05	3374483	1795777	1818045	53.9357	4.28781	PF01619	PTHR13914,PTHR13914:SF0	KOG0186	1.5.5.2	K00318	GO:0006562,GO:0004657	AT5G38710.1	0	Methylenetetrahydrofolate reductase family protein
SW_irrigated_Gene_JOINT	Phvul.008G022100	8	1843295	1845851	5	3374387	3374483	0.000349817	1	0.0150644	6.72e-05	3374483	1795777	1818045	53.9357	4.28781	PF01536	PTHR11570,PTHR11570:SF4	KOG0788	4.1.1.50	K01611	GO:0008295,GO:0006597,GO:0004014	AT3G02470.4	SAMDC	S-adenosylmethionine decarboxylase
SW_irrigated_Gene_JOINT	Phvul.008G022200	8	1844179	1844412	5	3374387	3374483	0.000349817	1	0.0150644	6.72e-05	3374483	1795777	1818045	53.9357	4.28781	PF08132	PTHR35727,PTHR35727:SF1	0	0	0	0	AT5G15948.1	CPuORF10	conserved peptide upstream open reading frame 10
SW_irrigated_Gene_JOINT	Phvul.008G022300	8	1847041	1848202	3	3381855_F_0_34_C_T	3374483	0.000541695	1	0.0195221	6.72e-05	3374483	1803125	1818045	30.9049	4.28039	0	PTHR34191,PTHR34191:SF2	0	0	0	0	AT5G38760.1	0	Late embryogenesis abundant protein (LEA) family protein
SW_irrigated_Gene_JOINT	Phvul.008G022400	8	1851015	1852080	3	3381855_F_0_34_C_T	3374483	0.000541695	1	0.0195221	6.72e-05	3374483	1803125	1818045	30.9049	4.28039	0	PTHR34191,PTHR34191:SF2	0	0	0	0	AT5G38760.1	0	Late embryogenesis abundant protein (LEA) family protein
SW_irrigated_Gene_JOINT	Phvul.008G022500	8	1852539	1853747	3	3381855_F_0_34_C_T	3374483	0.000541695	1	0.0195221	6.72e-05	3374483	1803125	1818045	30.9049	4.28039	PF08659	PTHR24322,PTHR24322:SF441	KOG0725	1.1.1.331	0	0	AT3G42960.1	ASD,ATA1,TA1	TAPETUM 1
SW_irrigated_Gene_JOINT	Phvul.010G032800	10	4770940	4771323	4	3378312_F_0_26_T_G	3374861	3.09091e-06	0.0314129	0.000931752	5.26e-09	3378312_F_0_26_T_G	4753221	4816881	48.8852	4.06935	0	PTHR34964,PTHR34964:SF1	0	0	0	0	AT5G17590.1	0	Putative membrane lipoprotein
SW_irrigated_Gene_JOINT	Phvul.008G022600	8	1854380	1856627	2	3375551	3374483	0.00018218	1	0.00966612	6.72e-05	3374483	1817992	1818045	26.4635	3.69677	PF01535	PTHR24015,PTHR24015:SF350	0	0	0	0	AT3G02490.1	0	Pentatricopeptide repeat (PPR) superfamily protein
SW_irrigated_Gene_JOINT	Phvul.008G016300	8	1328759	1329162	4	3374115	S08_1375832	0.00173746	1	0.0432789	5.08e-05	S08_1323687	1292161	1375832	23.8026	3.31967	0	0	0	0	0	0	0	0	0
SW_irrigated_Gene_JOINT	Phvul.008G016400	8	1331043	1331444	4	3374115	S08_1375832	0.00173746	1	0.0432789	5.08e-05	S08_1323687	1292161	1375832	23.8026	3.31967	PF00462	PTHR10168,PTHR10168:SF62	KOG1752	1.8.1.9	K03676	GO:0045454,GO:0015035,GO:0009055	AT5G14070.1	ROXY2	Thioredoxin superfamily protein
SW_irrigated_Gene_JOINT	Phvul.008G015700	8	1294505	1296926	3	3374115	S08_1323687	0.00164494	1	0.04138	5.08e-05	S08_1323687	1292161	1323687	16.8005	3.10945	PF00628	PTHR10615,PTHR10615:SF112	KOG1085	2.1.1.43	0	GO:0005515	AT5G24330.1	ATXR6,SDG34	ARABIDOPSIS TRITHORAX-RELATED PROTEIN 6
SW_irrigated_Gene_JOINT	Phvul.008G015800	8	1299787	1301970	3	3374115	S08_1323687	0.00164494	1	0.04138	5.08e-05	S08_1323687	1292161	1323687	16.8005	3.10945	PF00248	PTHR11732,PTHR11732:SF220	KOG1577	2.3.1.170	0	0	AT1G59960.1	0	NAD(P)-linked oxidoreductase superfamily protein
SW_irrigated_Gene_JOINT	Phvul.008G015900	8	1306625	1308335	3	3374115	S08_1323687	0.00164494	1	0.04138	5.08e-05	S08_1323687	1292161	1323687	16.8005	3.10945	PF09713	PTHR31871,PTHR31871:SF10	0	3.4.17.23	0	0	AT3G55240.1	0	Plant protein 1589 of unknown function
SW_irrigated_Gene_JOINT	Phvul.008G016000	8	1313459	1318021	3	3374115	S08_1323687	0.00164494	1	0.04138	5.08e-05	S08_1323687	1292161	1323687	16.8005	3.10945	PF14309	PTHR21726,PTHR21726:SF49	0	0	0	0	AT2G39435.1	0	Phosphatidylinositol N-acetyglucosaminlytransferase subunit P-related
SW_irrigated_Gene_JOINT	Phvul.008G016100	8	1322012	1324508	3	3374115	S08_1323687	0.00164494	1	0.04138	5.08e-05	S08_1323687	1292161	1323687	16.8005	3.10945	PF01423	PTHR23338	KOG3428	0	K11087	GO:0006396	AT4G02840.1	0	Small nuclear ribonucleoprotein family protein
SW_irrigated_Gene_JOINT	Phvul.008G016200	8	1324940	1325694	3	3374115	S08_1323687	0.00164494	1	0.04138	5.08e-05	S08_1323687	1292161	1323687	16.8005	3.10945	PF01928	PTHR34948,PTHR34948:SF2	0	3.6.1.3,3.6.1.25	0	0	AT2G11890.1	0	adenylate cyclases
SW_irrigated_Gene_JOINT	Phvul.002G002000	2	174266	175734	2	3368345	3378605_F_0_35_C_G	1.32672e-05	0.134835	0.00153221	4.62e-06	3368345	139713	196850	26.895	2.96531	PF06200,PF09425	PTHR33077,PTHR33077:SF13	0	0	K13464	0	AT1G74950.1	JAZ2,TIFY10B	TIFY domain/Divergent CCT motif family protein
SW_irrigated_Gene_JOINT	Phvul.002G002100	2	175881	180504	2	3368345	3378605_F_0_35_C_G	1.32672e-05	0.134835	0.00153221	4.62e-06	3368345	139713	196850	26.895	2.96531	PF00160	PTHR33344	KOG0884	5.2.1.8	0	GO:0006457,GO:0003755,GO:0000413	AT4G17070.1	0	peptidyl-prolyl cis-trans isomerases
SW_irrigated_Gene_JOINT	Phvul.002G002200	2	184415	187603	2	3368345	3378605_F_0_35_C_G	1.32672e-05	0.134835	0.00153221	4.62e-06	3368345	139713	196850	26.895	2.96531	PF00069	PTHR24343,PTHR24343:SF168	KOG0583	2.7.11.1	K14498	GO:0006468,GO:0005524,GO:0004672	AT4G33950.1	ATOST1,OST1,P44,SNRK2-6,SNRK2.6,SRK2E	Protein kinase superfamily protein
SW_irrigated_Gene_JOINT	Phvul.008G016900	8	1372056	1376747	3	S08_1323687	3384045_F_0_29_C_T	0.00216645	1	0.0479687	5.08e-05	S08_1323687	1323687	1395868	25.9442	2.88059	PF00479,PF02781	PTHR23429,PTHR23429:SF3	0	1.1.1.49	K00036	GO:0055114,GO:0050661,GO:0006006,GO:0004345	AT5G13110.1	G6PD2	glucose-6-phosphate dehydrogenase 2
SW_irrigated_Gene_JOINT	Phvul.010G032700	10	4751610	4764524	2	3378312_F_0_26_T_G	3378161_F_0_28_G_T	1.00796e-05	0.102439	0.00141039	5.26e-09	3378312_F_0_26_T_G	4753221	4813079	34.8875	2.66456	PF00626,PF04810,PF04815,PF08033,PF04811	PTHR11141,PTHR11141:SF2	0	0	K14006	GO:0030127,GO:0008270,GO:0006888,GO:0006886	AT2G21630.1	0	Sec23/Sec24 protein transport family protein
SW_irrigated_Gene_JOINT	Phvul.002G205200	2	37188537	37189462	2	S02_37216371	S02_37216372	0.0002744	1	0.0133232	7.25e-05	S02_37216372	37216371	37216372	23.4761	2.56035	PF01988	PTHR31851,PTHR31851:SF6	KOG4473	0	0	0	AT3G43660.1	0	Vacuolar iron transporter (VIT) family protein
SW_irrigated_Gene_JOINT	Phvul.002G205300	2	37195863	37196667	2	S02_37216371	S02_37216372	0.0002744	1	0.0133232	7.25e-05	S02_37216372	37216371	37216372	23.4761	2.56035	PF01988	PTHR31851,PTHR31851:SF6	KOG4473	0	0	0	AT3G43660.1	0	Vacuolar iron transporter (VIT) family protein
SW_irrigated_Gene_JOINT	Phvul.002G205400	2	37201914	37204960	2	S02_37216371	S02_37216372	0.0002744	1	0.0133232	7.25e-05	S02_37216372	37216371	37216372	23.4761	2.56035	PF00098,PF00076	PTHR24012	KOG0107	0	K12885	GO:0008270,GO:0003676	AT3G26420.1	ATRZ-1A	RNA-binding (RRM/RBD/RNP motifs) family protein with retrovirus zinc finger-like domain
SW_irrigated_Gene_JOINT	Phvul.009G263000	9	38191855	38201265	2	S09_38189357	3365445	0.00154504	1	0.0399548	0.00185876	S09_38189357	38189357	38235548	14.7261	2.46228	PF08389	PTHR15952	0	0	K14288	0	AT1G72560.3	PSD	ARM repeat superfamily protein
SW_irrigated_Gene_JOINT	Phvul.009G263100	9	38203158	38215438	2	S09_38189357	3365445	0.00154504	1	0.0399548	0.00185876	S09_38189357	38189357	38235548	14.7261	2.46228	PF06241	PTHR31563,PTHR31563:SF5	0	0	0	0	AT5G49960.1	0	0
SW_irrigated_Gene_JOINT	Phvul.009G263300	9	38224543	38235130	2	S09_38189357	3365445	0.00154504	1	0.0399548	0.00185876	S09_38189357	38189357	38235548	14.7261	2.46228	PF05383	PTHR22792,PTHR22792:SF52	KOG1855	0	K15191	0	AT2G43970.1	0	RNA-binding protein
SW_irrigated_Gene_JOINT	Phvul.003G009700	3	1074365	1077458	3	3374572	3375785	0.000653679	1	0.0225198	0.00179313	3374572	1033959	1055352	18.8029	1.93411	PF01535,PF13041	PTHR24015,PTHR24015:SF269	0	0	0	0	AT3G48810.1	0	Pentatricopeptide repeat (PPR) superfamily protein
SW_irrigated_Gene_JOINT	Phvul.003G009800	3	1078832	1082374	3	3374572	3375785	0.000653679	1	0.0225198	0.00179313	3374572	1033959	1055352	18.8029	1.93411	0	0	0	0	0	0	0	0	0
SW_irrigated_Gene_JOINT	Phvul.010G003400	10	561269	563741	2	3369182_F_0_28_T_A	3382844_F_0_43_T_G	0.0013478	1	0.036723	0.00071	3382844_F_0_43_T_G	574808	612515	15.1565	1.89597	0	0	0	0	0	0	0	0	0
SW_irrigated_Gene_JOINT	Phvul.010G003500	10	595961	596167	2	3369182_F_0_28_T_A	3382844_F_0_43_T_G	0.0013478	1	0.036723	0.00071	3382844_F_0_43_T_G	574808	612515	15.1565	1.89597	0	0	0	0	0	0	0	0	0
SW_irrigated_Gene_JOINT	Phvul.010G003600	10	612420	619025	2	3369182_F_0_28_T_A	3382844_F_0_43_T_G	0.0013478	1	0.036723	0.00071	3382844_F_0_43_T_G	574808	612515	15.1565	1.89597	PF01490	PTHR22950,PTHR22950:SF256	KOG1303	0	K13946	0	AT2G38120.1	AUX1,MAP1,PIR1,WAV5	Transmembrane amino acid transporter family protein
SW_irrigated_Gene_JOINT	Phvul.010G003666	10	619787	622588	2	3369182_F_0_28_T_A	3382844_F_0_43_T_G	0.0013478	1	0.036723	0.00071	3382844_F_0_43_T_G	574808	612515	15.1565	1.89597	PF00854	PTHR11654,PTHR11654:SF130	0	0	0	GO:0016020,GO:0006810,GO:0005215	AT2G37900.1	0	Major facilitator superfamily protein
SW_irrigated_Gene_JOINT	Phvul.010G003732	10	622893	624267	2	3369182_F_0_28_T_A	3382844_F_0_43_T_G	0.0013478	1	0.036723	0.00071	3382844_F_0_43_T_G	574808	612515	15.1565	1.89597	0	0	0	0	0	0	0	0	0
SW_irrigated_Gene_JOINT	Phvul.008G033800	8	2743953	2755250	4	S08_2729368	S08_2793533	0.000602977	1	0.0209149	0.000475	S08_2729368	2729368	2793533	30.6238	1.8065	PF07821,PF00128	PTHR10357,PTHR10357:SF157	KOG0471	3.2.1.1	K01176	GO:0005975,GO:0005509,GO:0004556,GO:0043169,GO:0003824	AT1G69830.1	AMY3,ATAMY3	alpha-amylase-like 3
SW_irrigated_Gene_JOINT	Phvul.002G321100	2	48651906	48659959	3	3379444_F_0_58_C_T	3376145	0.000553953	1	0.0197697	3.49e-05	3371175	48696411	48703516	23.4006	0.87551	PF02985,PF11916	PTHR16023,PTHR16023:SF0	0	0	K15305	GO:0005515,GO:0070772,GO:0043550	AT2G01690.1	0	ARM repeat superfamily protein
SW_irrigated_Gene_JOINT	Phvul.008G031300	8	2499545	2502698	2	8208010_F_0_53_G_A	8197471_F_0_15_A_G	0.000679784	1	0.0231834	8.6e-05	8208010_F_0_53_G_A	2466312	2506298	20.1741	0.247882	PF07714	PTHR27003,PTHR27003:SF41	KOG1187	2.7.11.1	0	GO:0006468,GO:0004672	AT5G28680.1	ANX2	Malectin/receptor-like protein kinase family protein
SW_irrigated_Gene_JOINT	Phvul.008G031400	8	2503995	2509765	2	8208010_F_0_53_G_A	8197471_F_0_15_A_G	0.000679784	1	0.0231834	8.6e-05	8208010_F_0_53_G_A	2466312	2506298	20.1741	0.247882	PF00561	PTHR10992,PTHR10992:SF872	KOG1454	0	0	0	AT3G29770.1	ATMES11,MES11	methyl esterase 11
1R2 (%): Phenotypic variance explained.
